# Supplementary material for: Canonical Wnt Pathway Controls mESC Self-Renewal Through Inhibition of Spontaneous Differentiation via β-Catenin/TCF/LEF Functions
Source: PubMed Central journal article supplement — Stem Cell Reports. 2020 Aug 20;15(3):646–61. doi: 10.1016/j.stemcr.2020.07.019 (PMC7486219; doi:10.1016/j.stemcr.2020.07.019), 2020-08-20
Supplement: mmc1.pdf [file mmc1.pdf]

**Stem Cell Reports, Volume 15**

**Supplemental Information**

**Canonical Wnt Pathway Controls mESC Self-Renewal Through Inhibition of Spontaneous Differentiation via  $\beta$ -Catenin/TCF/LEF Functions**

**Francesco Aulicino, Elisa Pedone, Francesco Sottile, Frederic Lluís, Lucia Marucci, and Maria Pia Cosma**

## Supplemental information

### Contents

|                                                                                                                                                                  |    |
|------------------------------------------------------------------------------------------------------------------------------------------------------------------|----|
| Supplemental figures .....                                                                                                                                       | 2  |
| Figure S1 – Knock-out models producing N-terminally truncated isoforms display normal clonogenicity and pluripotency marker expression. Related to Figure 1..... | 3  |
| Figure S2 – Characterization of $\beta$ -catenin knock-out clones. Related to Figure 2.....                                                                      | 5  |
| Figure S3 – RNA-seq analysis of $\beta$ -catenin depletion and Gsk3 inhibition in mESCs. Related to Figure 3.....                                                | 7  |
| Figure S4 – Canonical $\beta$ -catenin functions are required for inhibition of differentiation. Related to Figure 5.....                                        | 9  |
| Supplemental Tables.....                                                                                                                                         | 10 |
| Table S1 - Differentially expressed genes across pairwise comparisons .....                                                                                      | 10 |
| Table S2 - WTV_KOV Gene ontology summary .....                                                                                                                   | 10 |
| Table S3 - KOV_KOC Gene ontology summary .....                                                                                                                   | 10 |
| Table S4 - WTV_WTC Gene ontology summary .....                                                                                                                   | 10 |
| Table S5 - KOC_WTC Gene ontology summary.....                                                                                                                    | 10 |
| Table S6 – List of oligonucleotides, antibodies and PCR genotyping assays .....                                                                                  | 10 |
| Supplemental experimental procedures .....                                                                                                                       | 10 |
| qRT-PCR.....                                                                                                                                                     | 10 |
| Western blot, immunofluorescence, flow-cytometry and alkaline phosphatase staining .....                                                                         | 10 |
| Constructs.....                                                                                                                                                  | 11 |
| Supplemental DNA sequences .....                                                                                                                                 | 12 |
| Sanger sequencing – related to Figure S2B .....                                                                                                                  | 12 |
| Plasmid maps and sequences .....                                                                                                                                 | 13 |
| Generation of Ctnnb1 KO cells .....                                                                                                                              | 25 |
| Cell cycle and proliferation analysis .....                                                                                                                      | 25 |
| Lentivirus production .....                                                                                                                                      | 25 |
| Supplemental references .....                                                                                                                                    | 25 |

Supplemental figures

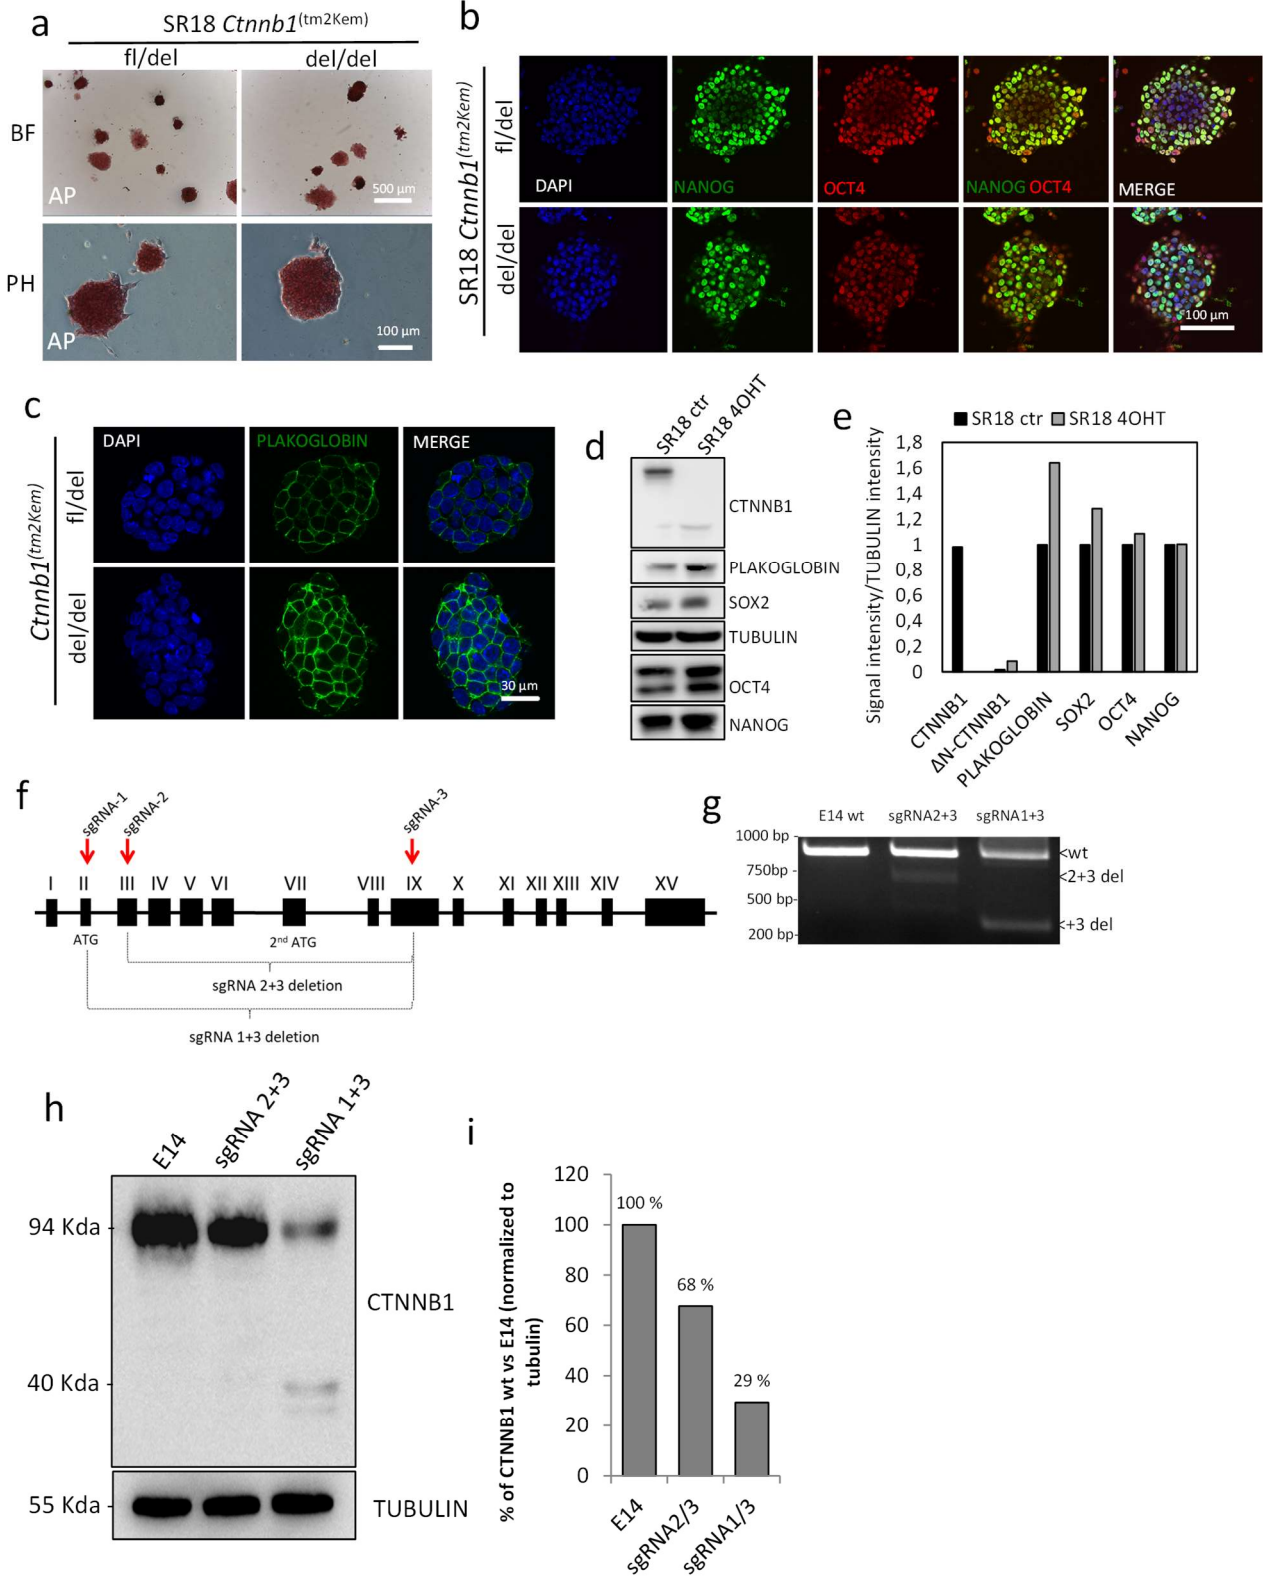

Figure S1

**Figure S1 – Knock-out models producing N-terminally truncated isoforms display normal clonogenicity and pluripotency marker expression. Related to Figure 1.**

**a)** SR18 *Ctnnb1<sup>fl/del</sup>* or *Ctnnb1<sup>del/del</sup>* display overall similar AP staining expression and morphology. BF=brightfield (scalebar=500  $\mu$ m), PH=phase contrast (scalebar=100  $\mu$ m). **b)** Immunofluorescence of Nanog and Oct4 on fixed SR18 *Ctnnb1<sup>fl/del</sup>* or *Ctnnb1<sup>del/del</sup>* cells. Scalebar=100  $\mu$ m. DAPI was used to counterstain nuclei. **c)** Immunofluorescence of Plakoglobin on fixed SR18 *Ctnnb1<sup>fl/del</sup>* or *Ctnnb1<sup>del/del</sup>* cells. Scalebar=30  $\mu$ m. DAPI was used to counterstain nuclei. **d, e)** Western blot (d) and quantification (e) of total protein extracts of SR18 *Ctnnb1<sup>fl/del</sup>* (SR18 ctr) or *Ctnnb1<sup>del/del</sup>* (SR18 4OHT) cells. Protein extracts were probed for  $\beta$ -catenin (CTNNB1), PLAKOGLOBIN, SOX2, OCT4 and NANOG. TUBULIN was used as loading control. **f)** Schematic representation of sgRNAs target positions along the  *$\beta$ -catenin* locus. sgRNAs were used in pairwise combinations to excise different gene regions. sgRNAs are represented as red arrows, indicating the position and orientation of oligonucleotides used for PCR genotyping (3 oligos PCR). **g)** PCR-genotyping of E14 mESCs transiently transfected with Cas9 and pairwise combinations of sgRNAs as depicted in f). Untransfected cells were used as parental control. Expected amplicon size is 824 bp for wild-type, 595 bp for sgRNA2+sgRNA3, 278 bp for sgRNA1+sgRNA3. **h)** Western blot for  $\beta$ -catenin on total protein extract of E14 mESCs parental cell line, or upon transient transfection of Cas9 and pairwise combination of sgRNAs as in f). TUBULIN was used as a loading control. **i)** Quantification of full-length  $\beta$ -catenin deletion in g).  $\beta$ -catenin band intensity was normalized on Tubulin intensity for each sample and then rescaled as a percentage of the untransfected parental cell line.

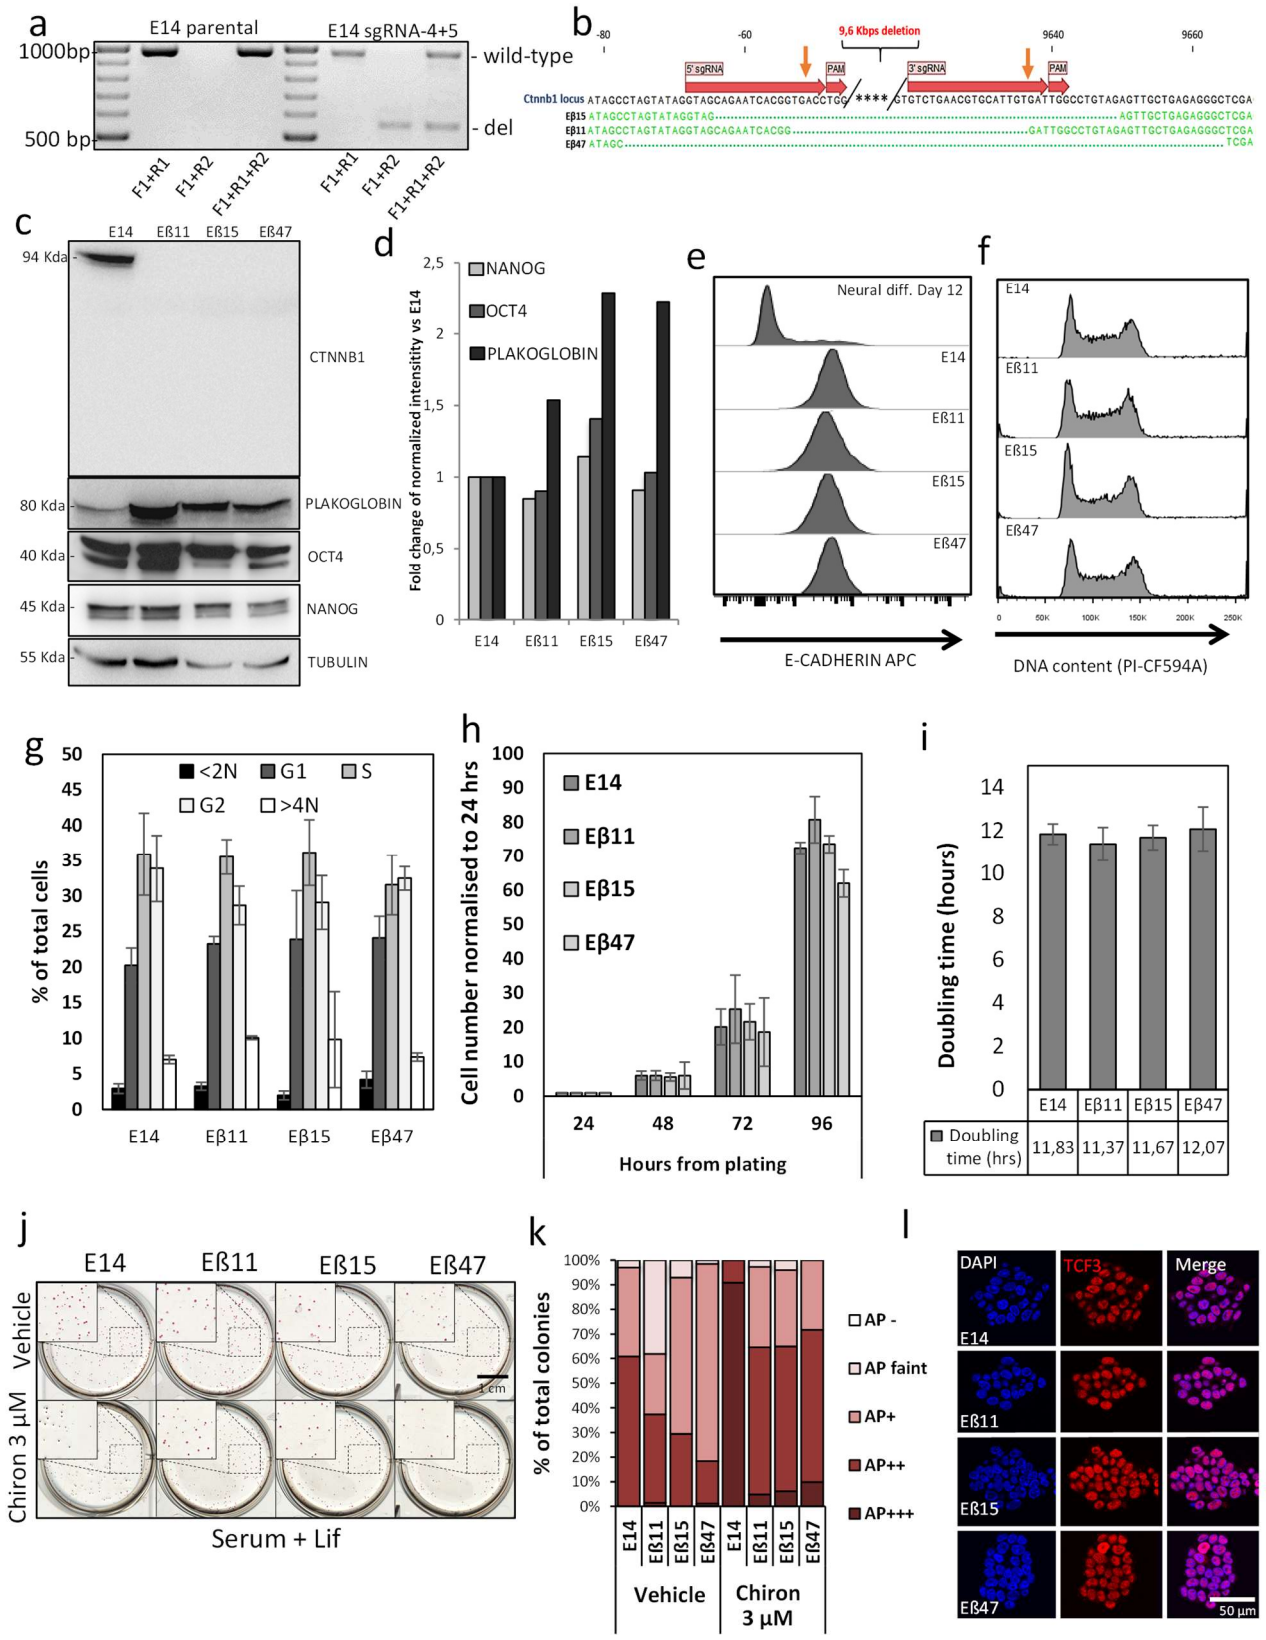

Figure S2

**Figure S2 – Characterization of  $\beta$ -catenin knock-out clones. Related to Figure 2.**

**a)** PCR genotyping of E14 transiently transfected with Cas9, sgRNA4 and sgRNA5 (right) and parental cell line (left). Three different oligos combinations were used to detect wild-type allele (F1+F2), deleted alleles (F1+R2) or both (F1+R1+R2). **b)** Sanger sequencing of E $\beta$ 11, E $\beta$ 15 and E $\beta$ 47 *Ctnnb1* edited locus. Matching bases are represented as green letters, green dots are deleted bases. Orange arrows indicate expected Cas9 editing sites, sgRNAs sequences and PAM are shown as red arrows. **c)** Western blot of total protein extracts from E14, E $\beta$ 11, E $\beta$ 15 and E $\beta$ 47 mESCs. Protein extracts were probed for  $\beta$ -catenin, PLAKOGLOBIN, NANOG and OCT4 expression. TUBULIN was used as loading control. **d)** Band intensity quantification relative to western blot in figure (c). Band intensities were normalized on TUBULIN intensity for each sample and then rescaled as fold-change with respect to the parental cell line. **e)** Flow cytometry analysis of E-CADHERIN expression in E $\beta$ 11, E $\beta$ 15, E $\beta$ 47 and parental E14 cells. E14 cells undergoing neuroectodermal differentiation were used as negative control for E-Cadherin expression (top). **f)** Representative flow-cytometry DNA content histograms in fixed E14, E $\beta$ 11, E $\beta$ 15 and E $\beta$ 47 cells. PI was used to measure DNA content. **g)** Histogram of cell-cycle analysis on flow-cytometry data in (f). Error bars represent standard error of four independent biological replicates. No statistically significant differences were observed using Student's T-test **h)** Growth curve of E14, E $\beta$ 11, E $\beta$ 15 and E $\beta$ 47 cells. Data are cell counts derived from flow-cytometry on living cells. Error bars represent standard deviation of three independent biological replicates. No statistically significant differences were observed using Student's T-test and doubling time analysis; **i)** Average population doubling times of E14, E $\beta$ 11, E $\beta$ 15 and E $\beta$ 47 cells, inferred from growth curve data in (h). Error bars represent standard deviation of three independent biological replicates. No statistically significant differences were observed using Student's T-test. **j)** AP staining of E14, E $\beta$ 11, E $\beta$ 15 and E $\beta$ 47 cells cultured in Serum/LIF in presence of Vehicle (0.3 % DMSO) or 3  $\mu$ M Chiron for 5 days. Whole plate scanning and magnification inset (dashed boxes). Scalebar= 1 cm. **k)** AP staining intensity quantification relative to Figure 2i. **l)** Immunofluorescence of parental E14 cells, E $\beta$ 11, E $\beta$ 15 and E $\beta$ 47 for Tcf3 expression. DAPI was used to counterstain nuclei. Scalebar= 50  $\mu$ m.

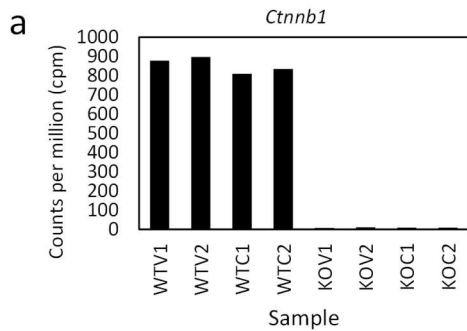

**b**

|         | noFC  | logFC >0.5 | logFC >1 | logFC >2 |    |
|---------|-------|------------|----------|----------|----|
| WTV/WTC | Total | 3134       | 1157     | 316      | 45 |
|         | UP    | 1454       | 476      | 111      | 14 |
| WTC/KOC | Total | 3690       | 1259     | 318      | 47 |
|         | UP    | 1716       | 437      | 98       | 21 |
| WTV/KOV | Total | 1318       | 286      | 51       | 11 |
|         | UP    | 658        | 192      | 30       | 2  |
| KOV/KOC | Total | 1423       | 254      | 44       | 6  |
|         | UP    | 697        | 124      | 19       | 3  |
|         | DOWN  | 726        | 130      | 25       | 3  |

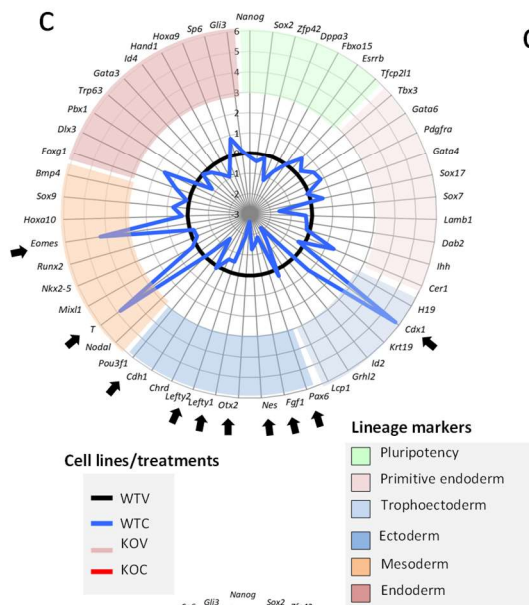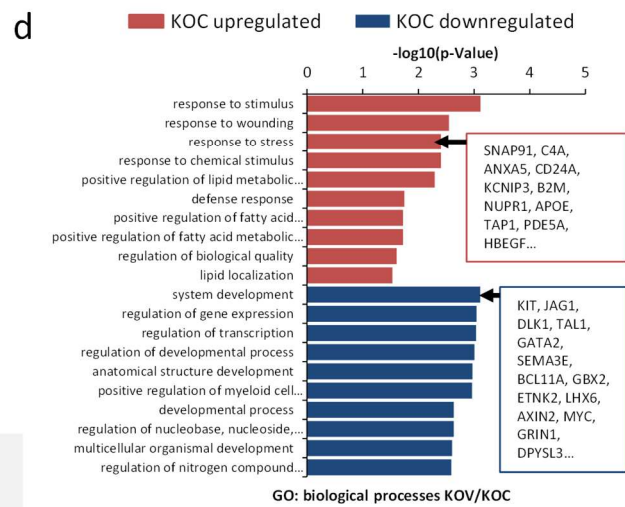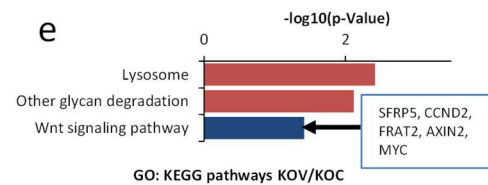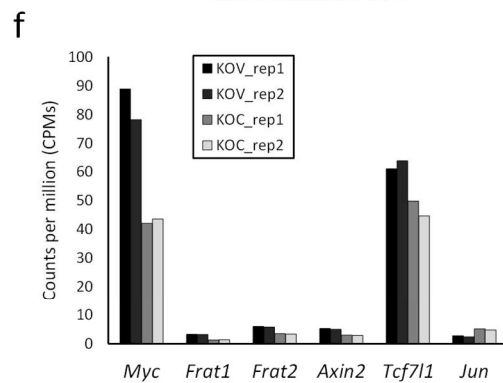

Figure S3

**Figure S3 – RNA-seq analysis of  $\beta$ -catenin depletion and Gsk3 inhibition in mESCs. Related to Figure 3.**

**a)** Histogram of *Ctnnb1* mRNA expression levels (raw counts) across WTV, WTC, KOV and KOC samples, individual replicates are shown. **b)** Number of differentially expressed genes in various comparison relative to Figure 3d. **c)** Radar plot showing the fold-change of pluripotency and lineage marker genes in WTC (top panel, blue line) or KOV, KOC samples (light and dark red lines respectively, bottom panel), versus WTV sample (black line, top and bottom panel). **d,** **e)** Gene ontology analysis of biological processes (d) and KEGG pathways (e) enriched in differentially expressed genes in the KOV/KOC comparison (adjusted -p-value <0.05, absolute logFC >0.5) **f)** Histogram of counts per million (CPMs) of canonical Wnt target genes with minor expression level changes in KOV/KOC comparison. Individual biological replicates are shown.



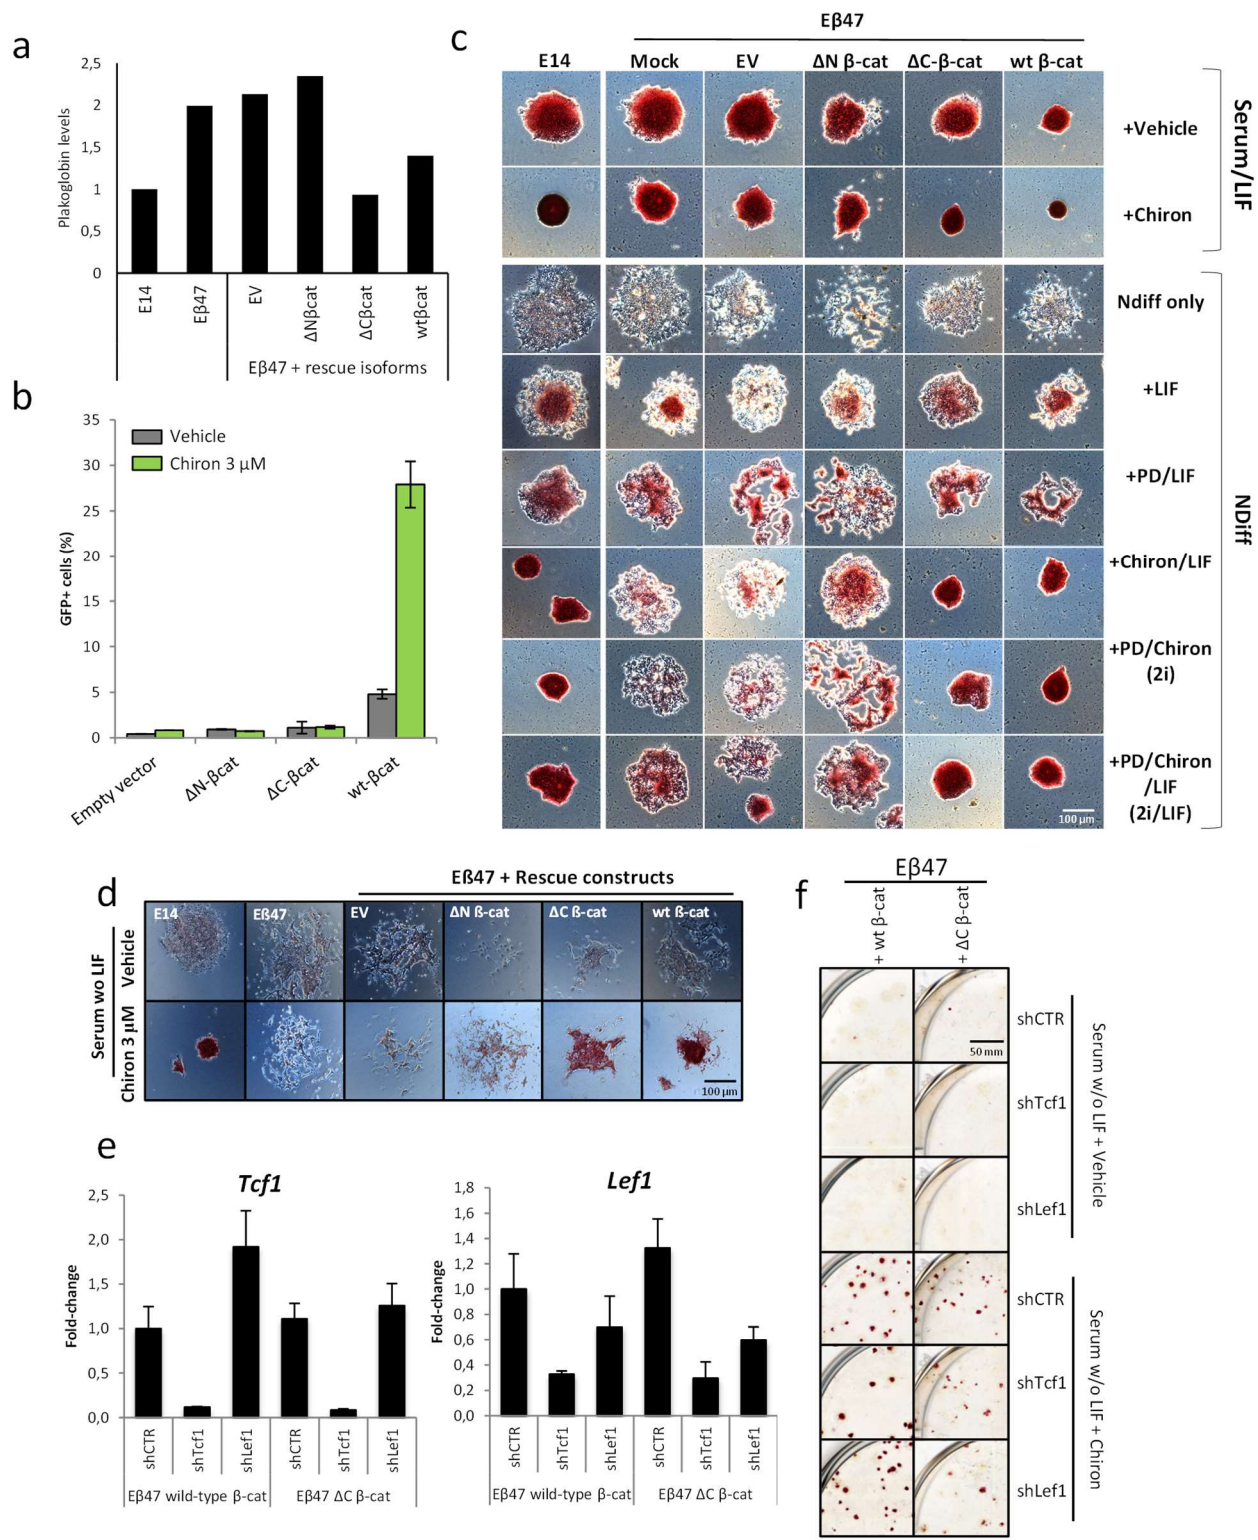

Figure S4

**Figure S4 – Canonical  $\beta$ -catenin functions are required for inhibition of differentiation. Related to Figure 5.**

a) Western blot quantification of PLAKOGLOBIN levels relative to Figure 5c. PLAKOGLOBIN/TUBULIN ratios are represented as fold change with respect to the E14 sample. b) E $\beta$ 47 cells were transduced with either EV,  $\Delta$ N  $\beta$ -cat,  $\Delta$ C  $\beta$ -cat or wt  $\beta$ -cat encoding lentiviruses. Cells were further transduced with the 7TGP Wnt reporter lentivirus and cultured for 48 hours in presence of 3  $\mu$ M Chiron (green bars) or Vehicle (0.3 % DMSO, grey bars). The percentage of eGFP positive cells is represented for each sample. Error bars represents standard error of two technical replicates. c) AP staining of E14 and E $\beta$ 47 cells, and E $\beta$ 47 cells, transduced with rescue  $\beta$ -catenin isoforms encoding lentiviruses and cultured for 1 week in the indicated media. Scalebar= 100  $\mu$ m. d) Exemplificative phase contrast pictures relative to Figure 5f. Scalebar = 100  $\mu$ m. e) qRT-PCR of *Tcf1* and *Lef1* levels in E $\beta$ 47 cells rescued with either wt  $\beta$ cat or  $\Delta$ C  $\beta$ -cat plasmids and transduced with lentivirus encoding short hairpin against *Tcf1* or *Lef1*. Error bars represents standard errors of technical triplicates. f) AP staining exemplificative pictures relative to Figure 5g. Scalebar= 50  $\mu$ m.

## Supplemental Tables

**Table S1 - Differentially expressed genes across pairwise comparisons**

**Table S2 - WTV\_KOV Gene ontology summary**

**Table S3 - KOV\_KOC Gene ontology summary**

**Table S4 - WTV\_WTC Gene ontology summary**

**Table S5 - KOC\_WTC Gene ontology summary**

**Table S6 – List of oligonucleotides, antibodies and PCR genotyping assays**

## Supplemental experimental procedures

### qRT-PCR

RNA was extracted and purified using with Maxwell LEV semi-automated RNA extraction kit (Promega) following manufacturer instructions. The cDNA was produced with iScript cDNA synthesis kit (BioRad). Real-time quantitative PCR reactions from 8,3 ng of cDNA were set up in triplicate using a LightCycler DNA SYBR Green I Master PCR machine (Roche). The oligonucleotides used in qRT-PCR experiments are provided in **Table S6**.

### Western blot, immunofluorescence, flow-cytometry and alkaline phosphatase staining

For western blot experiments cells were harvested and washed twice with PBS. Cell lysis was performed on ice for 25 min, in RIPA buffer (150 mM NaCl, 1% Nonidet P40, 0.5% sodium deoxycholate, 0.1% sodium dodecyl sulphate, 50 mM Tris-HCl, pH 8.0) containing a protease inhibitory cocktail (Roche). Insoluble material was pelleted by centrifugation at 16,000×g for 3 min at 4°C. Protein concentrations were determined using the Bradford assay (Bio-Rad). Thirty micrograms extract was mixed with 4× sample buffer (40% glycerol, 240 mM Tris/HCl, pH 6.8, 8% SDS, 0.04% bromophenol blue, 5% β-mercaptoethanol), denatured at 96°C for 5 minutes, separated by SDS-PAGE, and transferred to nitrocellulose membranes (PROTRAN-Whatman, Schleicher&Schuell). The membranes were blocked with 5% non-fat dry milk in TBS-T for 60 min, incubated with primary antibodies overnight at 4°C, washed three times with TBS-T for 10 min, incubated with the peroxidase-conjugated secondary antibody (1:2000; Amersham Biosciences) in TBST with 5% non-fat dry milk for 60 min, and washed three times with TBST for 10 min. Immunoreactive proteins were detected using Supersignal West Dura HRP Detection kits (Pierce). A list of the primary antibodies is provided in **Table S6**.

For flow-cytometry analysis, cells were trypsinised, washed once in PBS, resuspended in PBS with 5% FBS + 4',6-diamidino-2-phenylindole (DAPI) and analysed on BD Fortessa cytometer. For E-cadherin staining, incubation with the PE conjugated antibody was performed after the first wash. Neuronally differentiated mESCs were used as negative staining control.

For immunofluorescence, mESCs were fixed with 4% paraformaldehyde for 20 min at room temperature, and then washed twice with PBS following incubation in blocking solution containing 10% goat serum or 3% Bovine Serum Albumin (Sigma) and 0.1% Triton X-100 (Sigma) for 1 h at room temperature. The cells were then left overnight at 4 °C in blocking solution containing the primary antibody. The next day, the cells were washed three times with PBS and then incubated with the secondary antibody for 1 h at room temperature in PBS. The primary antibodies used are provided in **Table S6**. Goat anti-mouse IgG, goat anti-rabbit IgG, (1:1000, Life Technologies) conjugated to Alexa Fluor-488 or Alexa Fluor-594 were used as secondary antibodies. Nuclear staining was performed with DAPI (Life Technologies). For multichannel fluorescence intensity plots in **Figure 1E**, the BAR plugin from FIJI on multi-channel composite images was used. Fluorescence intensities were measured across a section line of equal length as in (Lyashenko et al., 2011).

For AP staining, 600 cells per well were seeded on gelatin coated 6-well plates; fresh medium was added every two days. When distinguishable colonies were formed (usually 5 to 7 days after seeding) cells were washed twice with PBS fixed in 10% Neutral Formalin Buffer for 15 min at 4°C, and washed three times with distilled water. Fixed cells were then incubated for 45 min at room temperature in 2ml/well of the staining solution prepared as follows: 0,005g Naphthol AS MX-PO4 (Sigma, N5000), 0,03g Red Violet LB salt (Sigma, F1625), 200 µl N,N-Dimethylformamide (DMF, Fischer Scientific, D1191), 25 ml of Tris-HCl (MW=157.6, pH 8.3, 0.2M), and 25 ml of distilled water. Finally, the staining

solution was removed, and cells were overlaid with 2 ml PBS and imaged using phase contrast and widefield microscopy. Whole plate scanning images were acquired through a high-resolution scanner. AP staining intensity was manually scored as previously described (Wray et al., 2011) using phase contrast microscopy.

### **Constructs**

sgRNAs were cloned by annealed oligos cloning into px459-SpCas9-Puro (Addgene # 48138) as previously described (De Jaime-Soguero et al., 2017), oligonucleotides used for generating Ctnnb1 targeting vectors are listed in **Table S6**. pSpCas9(BB)-2A-Puro (PX459) was a gift from Dr Feng Zhang (Ran et al., 2013). Lentiviral vectors expressing wt or truncated  $\beta$ -catenin isoforms (pL-EF1a-Puro) were generated by Gibson assembly. pL-EF1a-Puro backbone was amplified by PCR from 7TGP vector (Addgene#24305) while hEF1a promoter was amplified from p1494 EF1a Ires Hygro vector (Aulicino et al., 2014). Wt  $\beta$ -cat CDS was amplified from mESCs cDNA using Superscript III first-strand cDNA synthesis kit. Mutant  $\beta$ -catenin CDSs were generated by PCR on the wild-type product. Sequences for pL-EF1a Puro based vectors expressing wt and mutant  $\beta$ -catenin isoforms are provided in **Supplemental DNA sequences**. 7TGP was a gift from Dr Roel Nusse (Fuerer and Nusse, 2010). Short-hairpins RNAs were cloned in pLKO Hygro as previously described (Aulicino et al., 2014). Oligonucleotides sequences for short-hairpin cloning are provided in **Table S6**. pLKO.1 hygro was a gift from Bob Weinberg (Addgene plasmid # 24150). The maps and the full-length sequences of all the constructs generated in this study are provided in **Supplemental DNA sequences**.

List of top oligonucleotides used for cloning sgRNAs into px459-spCas9-Puro digested with BbsI.

## Supplemental DNA sequences

### Sanger sequencing – related to Figure S2B

Forward sequencing oligo (5'-3'): CACCGTATGCCTACAATCTGTTTCTA

Reverse sequencing oligo (5'-3'): CTACACAATGTTACACGTCTCCAGAT

#### >Eβ11-Forward

NNNNNNNNCTTCTGACCCGTGGCTGCTGTGTATTTTTAGTGTATGCCATGGTGAAC TGGCTTTTGGTGTG  
GGGGCACATAGCCTAGTATAGGTAGAGTTGCTGAGAGGGCTCGAGGGGTGGGCTGGTATCTCAGAAAAGT  
GCCTGACACACTAACCAAGCTGAGTTTCTATGGGAACAGTCGAAGTACGCTTTTTGTTCTGGTCCTTTTT  
GGTTCGAGGAGTAACAATACAAATGGATTTGGGGAGTGACTCACGCAGTGAAGAATGCACACGAATGGAT  
CACAAGATGGCGTTATCAAACCCTAGCCTTGCTTGTCTTTGTTTTAATATCTGTAGTGGTGTGACTTTGC  
TTGCTTTTATTTTTGCAGTAACTGTTAGTTTTTAAGTAGTGTATGTTCTAGTGAACCTGCTACAGCAATT  
TCTGATTTCTAAGAACCGAGTAATGGTGTAGAACACTAATTCATAATCACGCTAATTGTAATCTGGAGAC  
GTGTACAATTGTGTAGANNNA

#### >Eβ11-Reverse

TATAGCGTGATTTGATTCGTGTTCTACACCATTTACTCCGGTTTCTTAGAAAATCAGAAAATTTGCTGTAGCA  
GGTTCACTAGAACATAACACTACTTAAAACTAACAGTTACTGCAAAAAATAAAAAGCAAGCAAAGTCAG  
CACCCTACAGATATTA AAAACAAGAACAAGCAAGGCTAGGGTTTGATAACGCCATCTTGTGATCCATTC  
GTGTGCATTCTTCACTGCGTGAGTCACTCCCCAAATCCATTTGTATTGTTACTCCTCGACCAAAAAGGACC  
AGAACAAAAAGCGTACTTCGACTGTTCCCATAGGAACTCAGCTTGGTTAGTGTGTCAGGCACTTTCTGA  
GATACCAGCCCACCCCTCGAGCCCTCTCAGCAACTCTACCTATACTAGGCTATGTGCCCGACACCAAAA  
GCCAGTTCACCATGGCATACTA AAAATAACACAGCAGCCACGGTGTGAGGAAGCTCTTCTCAGTAGAAA  
CAGATTGTAGGCATAACGGTGA

#### >Eβ15 Forward

CCCGNNANNNNNNNNGNCNNGTGGCTTGCNGTGTATTTNAGTTGTATGCCATGGTGAAC TGGCTTTTGG  
TGTCGGGGCACATAGCCTAGTATAGGTAGCAGAATCACGGGATTGGCCTGTAGAGTTGCTGAGAGGGCTC  
GAGGGGTGGGCTGGTATCTCAGAAAAGTGCCTGACACACTAACCAAGCTGAGTTTCTATGGGAACAGTCG  
AAGTACGCTTTTTGTTCTGGTCCTTTTTGGTCGAGGAGTAACAATACAAATGGATTTGGGGAGTGACTCAC  
GCAGTGAAGAATGCACACGAATGGATCACAAGATGGCGTTATCAAACCCTAGCCTTGCTTGTCTTTGTTT  
TAATATCTGTAGTGGTGTGACTTTGCTTGTCTTTATTTTTGCAGTAACTGTTAGTTTTTAAGTAGTGTTA  
TGTTCTAGTGAACCTGCTACAGCAATTTCTGATTTCTAAGAACCGAGTAATGGTGTAGAACACTAATTCAT  
AATCACGCTAATTGTAATCTGGAGACGTGTACAATTTGTGTAGANNNA

#### >Eβ15-Reverse

NNNNNNNNNGTGNNTGANNNGTNGTNCTACACCATTTACTCCGGTTNCTTAGAAAATCAGAAAATNGCTG  
TAGCAGGTTCACTAGAACATAACACTACTTAAAACTAACAGTTACTGCAAAAAATAAAAAGCAAGCAAA  
GTCAGCACCCTACAGATATTA AAAACAAGAACAAGCAAGGCTAGGGTTTGATAACGCCATCTTGTGATC  
CATTCTGTGCATTCTTCACTGCGTGAGTCACTCCCCAAATCCATTTGTATTGTTACTCCTCGACCAAAA  
GGACCAGAACAAAAAGCGTACTTCGACTGTTCCCATAGGAACTCAGCTTGGTTAGTGTGTCAGGCACTT  
TCTGAGATACCAGCCCACCCCTCGAGCCCTCTCAGCAACTCTACAGGCCAATCCCGTGATTCTGCTACCTA  
TACTAGGCTATGTGCCCGACACCAAAAAGCCAGTTCACCATGGCATACTA AAAATAACACAGCAGCCAC  
GGTGTGAGGAAGCTCTTCTCAGTAGAAAACAGATTGTAGCCNTTACGGGTGANNA

#### >Eβ47-Forward

NNNGNNNNNCTNCTGACCNGTGGCTGCTGTGTATTTTTAGTGTATGCCATGGTGAAC TGGCTTTTGGTGT  
CGGGGCACATAGCTCGAGGGGTGGGCTGGTATCTCAGAAAAGTGCCTGACACACTAACCAAGCTGAGTTT  
CTATGGGAACAGTCGAAGTACGCTTTTTGTTCTGGTCCTTTTTGGTTCGAGGAGTAACAATACAAATGGATT  
TGGGGAGTGACTCACGCAGTGAAGAATGCACACGAATGGATCACAAGATGGCGTTATCAAACCCTAGCC  
TTGCTTGTCTTTGTTTTAATATCTGTAGTGGTGTGACTTTGCTTGTCTTTATTTTTGCAGTAACTGTTAG  
TTTTTAAGTAGTGTATGTTCTAGTGAACCTGCTACAGCAATTTCTGATTTCTAAGAACCGAGTAATGGT  
TAGAACACTAATTCATAATCACGCTAATTGTAATCTGGAGACGTGTACATTNGTGTAGANNNA

#### >Eβ47-Reverse

NNTNNNNCGTGATTATGATTAGTGTCTACACCATTACTCGGTTCTTAGAAATCAGAAATTGCTGTAGCAG  
 GTTCACTAGAACATAACACTACTTAAAAACTAACAGTTACTGCAAAAAATAAAAGCAAGCAAAGTCAGC  
 ACCACTACAGATATTAACAACAAGAACAAGCAAGGCTAGGGTTTGATAACGCCATCTTGTGATCCATTCCG  
 TGTGCATTCTTCACTGCGTGAGTCACTCCCAAATCCATTTGTATTGTTACTCCTCGACCAAAAAGGACCA  
 GAACAAAAAGCGTACTTCGACTGTTCCCATAGGAACTCAGCTTGGTTAGTGTGTCAGGCACTTTCTGAG  
 ATACCAGCCCACCCCTCGAGCTATGTGCCCCGACACCAAAAAGCCAGTTCACCATGGCATACTAAAAAT  
 ACACAGCAGCCACGGTGTGAGGAAGCTCTTCTCAGTAGAAACAGATTGTAGCCNTNACCGGTGANNA

**Plasmid maps and sequences**

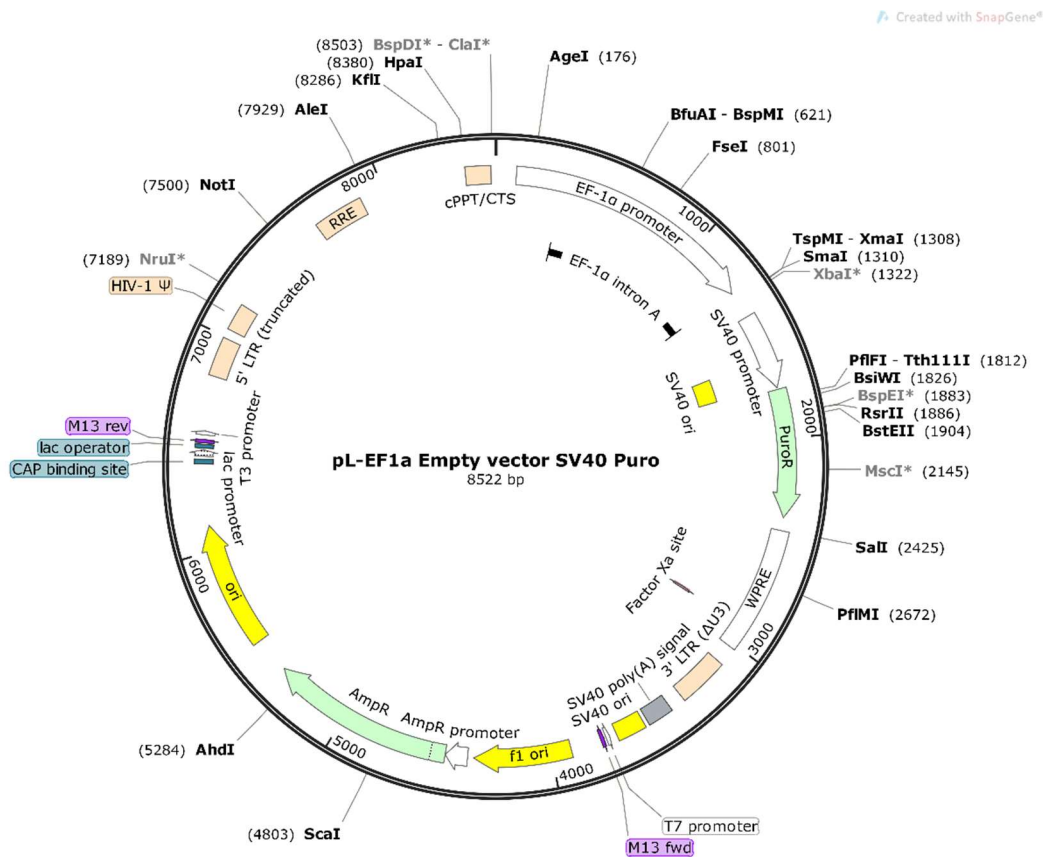

**>pL-EF1a empty vector SV40 Puro**

CTAGCCCCGATAAGCTTTGCAAAGATGGATAAAAGTTTTAAACAGAGAGGAATCTTTGCAGCTAATGGACC  
 TTCTAGGTCTTGAAAGGAGTGGAATTGGCTCCGGTGCCGTCAGTGGGCAGAGCGCACATCGCCACAG  
 TCCCCGAGAAGTTGGGGGAGGGTTCGGCAATTGAACCGGTGCCTAGAGAAGGTGGCGCGGGGTAAACT  
 GGGAAAGTGATGTCGTGACTGGCTCCGCCTTTTCCCGAGGGTGGGGGAGAACCCTATATAAGTGCAGT  
 AGTCGCCGTGAACGTTCTTTTTCGCAACGGGTTTGCCGCCAGAACACAGGTAAGTGCCGTGTGTGGTTCCC  
 GCGGGCCTGGCCTCTTACGGGTTATGGCCCTGCGTGCCTTGAATTACTTCCACTGGCTGCAGTACGTGA  
 TTCTTGATCCCGAGCTTCGGGTTGGAAGTGGGTGGGAGAGTTCGAGGCCTTGCCTTAAGGAGCCCCTTC  
 GCCTCGTGCTTGAGTTGAGGCCTGGCCTGGGCGCTGGGGCCCGCGTGCGAATCTGGTGGCACCTTCGC  
 GCCTGTCTCGCTGCTTCGATAAGTCTCTAGCCATTTAAAATTTTTGATGACCTGCTGCGACGCTTTTTTTC  
 TGGCAAGATAGTCTTGTAATGCGGGCCAAGATCTGCACACTGGTATTTTCGGTTTTTGGGGCCGCGGGCG  
 GCGACGGGGCCCGTGCGTCCCAGCGCACATGTTTCGGCGAGGCGGGGCCTGCGAGCGCGGCCACCGAGAA  
 TCGGACGGGGGTAGTCTCAAGCTGGCCGGCCTGCTCTGGTGCCTGGCCTCGCGCCCGCTGTATCGCCCC  
 GCCCTGGGCGGCAAGGCTGGCCCCGTCGGCACCAAGTTGCGTGAGCGGAAAGATGGCCGCTTCCCGGCCCT  
 GCTGCAGGGAGCTCAAAATGGAGGACGCGGCGCTCGGGAGAGCGGGCGGGTGAGTCACCACACAAAG  
 GAAAAGGGCCTTCCGTCCTCAGCCGTCGCTTCATGTGACTCCACGGAGTACCGGGCGCCGTCCAGGCAC  
 CTCGATTAGTTCTCGAGCTTTTGGAGTACGTCGTCTTAGGTTGGGGGAGGGGTTTTATGCGATGGAGTT  
 TCCCCACACTGAGTGGGTGGAGACTGAAGTTAGGCCAGCTTGGCACTTGATGTAATTCTCCTTGAATTTG

CCCTTTTTGAGTTTGGATCTTGGTTCATTCTCAAGCCTCAGACAGTGGTTCAAAGTTTTTTTTCTTCCATTTCC  
AGGTGTCGTGAGGAATTCTGCAGTCGATCGACGGTACCGCGGGCCCCGGGGCTCGAGATCTAGAGTCGAG  
AAGCTTGATGATCTGCGCAGCACCATGGCCTGAAATAACCTCTGAAAGAGGAACTTGGTTAGGTACCTTC  
TGAGGCGGAAAGAACCAGCTGTGGAATGTGTGTCAGTTAGGGTGTGGAAAGTCCCCAGGCTCCCCAGCA  
GGCAGAAGTATGCAAAGCATGCATCTCAATTAGTCAGCAACCAGGTGTGGAAAGTCCCCAGGCTCCCCAG  
CAGGCAGAAGTATGCAAAGCATGCATCTCAATTAGTCAGCAACCATAGTCCCGCCCCTAACTCCGCCCAT  
CCCGCCCCTAACTCCGCCAGTTCGCCCATTTCTCCGCCCATGGCTGACTAATTTTTTTTTATTTATGCAGA  
GGCCGAGGCCGCTCGGCCTCTGAGCTATTCCAGAAGTAGTGAGGAGGCTTTTTTGGAGGCCCTAGGCTTT  
TGCAAAAAGCTTACCATGACCGAGTACAAGCCACGGTGCCTCGCCACCCGCGACGACGTCCCCAGGG  
CCGTACGCACCCTCGCCGCCGCTTCGCCGACTACCCCGCCACGCGCCACACCGTCGATCCGGACCGCCA  
CATCGAGCGGGTCACCGAGCTGCAAGAACTCTTCCCTACGCGCGTTCGGGCTCGACATCGGCAAGGTGTGG  
GTCGCGGACGACGGCGCCGCGGTGGCGGTCTGGACCACGCCGGAGAGCGTCAAGCGGGGGCGGTGTTCC  
GCCGAGATCGGCCCGCGCATGGCCGAGTTGAGCGGTTCCCGGCTGGCCGCGCAGCAACAGATGGAAGGC  
CTCCTGGCGCCGCACCGGCCAAGGAGCCCGCGTGGTTTCTGGCCACCGTCGGCGTCTCGCCGACCACC  
AGGGCAAGGGTCTGGGCAGCGCCGTCGTGCTCCCGGAGTGGAGGCGGCCGAGCGCGCCGGGGTGCCTCG  
CCTTCTGGAGACCTCCGCGCCCCGCAACCTCCCCTTCTACGAGCGGCTCGGCTTACCGTCACCGCCGAC  
GTCGAGTCCCCGAAGGACCGCGCGACCTGGTGCATGACCCGCAAGCCCGGTGCCTGACGCCCGCCCCACG  
ACCCGACGCGCCCCACCGAAAGGAGCGCACGACCCCATGCCAGTCGACAATCAACCTCTGGATTACAAA  
ATTTGTGAAAGATTGACTGGTATTCTTAACATATGTTGCTCCTTTTACGCTATGTGGATACGCTGCTTTAATG  
CCTTTGTATCATGCTATTGCTTCCCGTATGGCTTTCATTTTCTCCTCCTTGTATAAATCCTGGTTGCTGTCTC  
TTTATGAGGAGTTGTGGCCCGTTGTTCAGGCAACGTGGCGTGGTGTGCACTGTGTTTGTGACGCAACCCCC  
ACTGGTTGGGGCATTGCCACCACCTGTCAGTCTCCTTTCCGGGACTTTTCGCTTTCCCCCTCCCTATTGCCACG  
GCGGAACTCATCGCCGCTGCCTTGCCCGCTGCTGGACAGGGGGCTCGGCTGTTGGGCACTGACAATTCCG  
TGGTGTGTCGGGGAAGCTGACGTCTTTCCATGGCTGCTCGCCTGTGTTGCCACCTGGATTCTGCGCGGG  
ACGTCTTCTGCTACGTCCCTTCGGCCCTCAATCCAGCGGACCTTCCCTTCCCGCGGCCCTGCTGCCGGCTCT  
GCGGCCCTTCCCGCTCTTCGCCTTCGCCCTCAGACGAGTCGGATCTCCCTTTGGGGCCGCTCCCCGCCTG  
GAATTCGAGCTCGGTACCTTTAAGACCAATGACTTACAAGGCAGCTGTAGATCTTAGCCACTTTTTAAAA  
GAAAAGGGGGGACTGGAAGGGCTAATCACTCCAACGAAGACAAGATCTGCTTTTTGCTTGTACTGGGT  
CTCTCTGGTTAGACCAGATCTGAGCCTGGGAGCTCTCTGGCTAACTAGGGAACCCACTGCTTAAGCCTCA  
ATAAAGCTTGCCTTGAGTGTTCAGTAGTGTGTGCCCGTCTGTTGTGTGACTCTGGTAACTAGAGATCCC  
TCAGACCCTTTTAGTCAGTGTGGAAAATCTCTAGCAGTAGTAGTTCATGTCATCTTATTATTAGTATTTAT  
AAGCAATAGCATCACAATTTTACAATAAAGCATTTTTTTTTACTGCATTCTAGTTGTGGTTTGTCCAAAC  
TCATCAATGTATCTTATCATGTCTGGCTCTAGCTATCCCGCCCCTAACTCCGCCAGTTCGCCCCATTCTCC  
GCCCCATGGCTGACTAATTTTTTTTTATTTATGCAGAGGCCGAGGCCGCCTCGGCCTCTGAGCTATTCCAGA  
AGTAGTGAGGAGGCTTTTTTGGAGGCCCTAGGCTTTTGCCTCGAGACGTACCCAATTCGCCCTATAGTGAGT  
CGTATTACGCGCGCTCACTGGCCGTCGTTTTACAACGTCGTGACTGGGAAAACCCTGGCGTTACCCAACCT  
AATCGCCTTGCAGCACATCCCCCTTTCGCCAGCTGGCGTAATAGCGAAGAGGCCCGCACCGATCGCCCTT  
CCCAACAGTTGCGCAGCCTGAATGGCGAATGGCGCGACGCGCCCTGTAGCGGCGCATTAAGCGCGGCGG  
GTGTGGTGGTTACGCGCAGCGTGACCGCTACACTTGCCAGCGCCCTAGCGCCCCTCCTTTTCGCTTTCTTC  
CCTTCTTTCTCGCCACGTTTCGCCGGCTTTCCCCGTCAGCTCTAAATCGGGGGCTCCCTTTAGGGTTCCGA  
TTTAGTGCTTTACGGCACCTCGACCCCAAAAAACTTGATTAGGGTGTATGGTTCACGTAGTGGGCCATCGCC  
CTGATAGACGGTTTTTTCGCCCTTTGACGTTGGAGTCCACGTTCTTTAATAGTGGACTCTTGTTCCAAACTG  
GAACAACACTCAACCCTATCTCGGTCTATTCTTTGATTTATAAGGGATTTTGGCGATTTCCGCCCTATTGGT  
TAAAAAATGAGCTGATTTAACAAAAATTTAACCGGAATTTAACAAAAATTTAACGTTTACAATTTCCCA  
GGTGGCACTTTTTCGGGGAATGTGCGCGGAACCCCTATTTGTTTATTTTTCTAAATACATTCAAATATGTA  
TCCGCTCATGAGACAATAACCCTGATAAATGCTTCAATAATATTGAAAAAGGAAGAGTATGAGTATTCAA  
CATTTCCGTGTCGCCCTTATTCCCTTTTTTTCGGCATTTCCTTCTGTTTTTGTCTACCCAGAAACGCTG  
GTGAAAGTAAAAGATGCTGAAGATCAGTTGGGTGCACGAGTGGGTTACATCGAACTGGATCTCAACAGC  
GGTAAGATCCTTGAGAGTTTTTCGCCCGAAGAACGTTTTCCAATGATGAGCACTTTTAAAGTTCTGCTATG  
TGGCGCGGTATTATCCCGTATTGACGCCGGGCAAGAGCAACTCGGTCGCCGCATACACTATTCTCAGAAT  
GACTTGGTTGAGTACTACCAGTCACAGAAAAGCATCTTACGGATGGCATGACAGTAAGAGAATTATGCA  
GTGCTGCCATAACCATGAGTGATAACACTGCGGCCAACTTACTTCTGACAACGATCGGAGGACCGAAGGA  
GCTAACCGCTTTTTTGCACAACATGGGGGATCATGTAACCTCGCCTTGATCGTTGGGAACCGGAGCTGAAT  
GAAGCCATACCAAACGACGAGCGTGACACCACGATGCCTGTAGCAATGGCAACAACGTTGCGCAAACCTA  
TTAACTGGCGAACTACTTACTCTAGCTTCCCGGCAACAATTAATAGACTGGATGGAGGCGGATAAAGTTG  
CAGGACCACTTCTGCGCTCGGCCCTTCCGGTGGCTGGTTTATTGCTGATAAATCTGGAGCCGGTGAGCGT

GGGTCTCGCGGTATCATTGCAGCACTGGGGCCAGATGGTAAGCCCTCCCGTATCGTAGTTATCTACACGA  
CGGGGAGTCAGGCAACTATGGATGAACGAAATAGACAGATCGCTGAGATAGGTGCCTCACTGATTAAGC  
ATTGGTAACTGTCAGACCAAGTTTACTCATATATACTTTAGATTGATTTAAAACCTCATTTTTTAATTTAAAA  
GGATCTAGGTGAAGATCCTTTTTGATAATCTCATGACCAAATCCCTTAACGTGAGTTTTTCGTTCCACTGA  
GCGTCAGACCCCGTAGAAAAGATCAAAGGATCTTCTTGAGATCCTTTTTTTCTGCGCGTAATCTGCTGCTT  
GCAAACAAAAAAACCACCGCTACCAGCGGTGGTTTTGTTTGGCCGATCAAGAGCTACCAACTCTTTTTCCG  
AAGGTAAGTGGCTTCAGCAGAGCGCAGATACCAAATACTGTCCTTCTAGTGTAGCCGTAGTTAGGCCACC  
ACTTCAAGAACTCTGTAGCACCGCCTACATACCTCGCTCTGCTAATCCTGTTACCAGTGGCTGCTGCCAGT  
GGCGATAAGTCGTGTCTTACCGGGTTGGACTCAAGACGATAGTTACCGGATAAAGGCGCAGCGGTGCGGGCT  
GAACGGGGGGTTCGTGCACACAGCCAGCTTGGAGCGAACGACCTACACCGAACTGAGATACCTACAGC  
GTGAGCTATGAGAAAGCGCCACGCTTCCCGAAGGGAGAAAGGCGGACAGGTATCCGGTAAGCGGCAGGG  
TCGGAACAGGAGAGCGCACGAGGGAGCTTCCAGGGGGAAACGCCTGGTATCTTTATAGTCTGTGCGGGT  
TCGCCACCTCTGACTTGAGCGTCGATTTTTGTGATGCTCGTCAGGGGGGGCGGAGCCTATGGAAAAACGCC  
AGCAACGCGGCCTTTTTACGGTTCCTGGCCTTTTGTGCTGCTGCTCACATGTTCTTTCTGCGTTATCC  
CCTGATTCTGTGGATAACCGTATTACCGCCTTTGAGTGAGCTGATACCGCTCGCCGACCCGAACGACCG  
AGCGCAGCGAGTCAGTGAGCGAGGAAGCGGAAGAGCGCCCAATACGCAAACCGCCTCTCCCCGCGCGTT  
GGCCGATTCATTAATGCAGCTGGCACGACAGGTTTCCCGACTGGAAAGCGGGCAGTGAGCGCAACGCAA  
TTAATGTGAGTTAGCTCACTCATTAGGCACCCCAGGCTTTACACTTTATGCTTCCGGCTCGTATGTTGTGTG  
GAATTGTGAGCGGATAACAATTTACACAGGAAACAGCTATGACCATGATTACGCCAAGCGCGCAATTA  
CCCTCACTAAAGGGAACAAAAGCTGGAGCTGCAAGCTTAATGTAGTCTTATGCAATACTCTTGTAGTCTT  
GCAACATGGTAACGATGAGTTAGCAACATGCCTTACAAGGAGAGAAAAAGCACCGTGCATGCCGATTGG  
TGGAAGTAAGGTGGTACGATCGTGCCTTATTAGGAAGGCAACAGACGGGTCTGACATGGATTGGACGAA  
CCACTGAATTGCCGATTGCAGAGATATTGTATTTAAGTGCCTAGCTCGATACAATAAACGGGTCTCTCTG  
GTTAGACCAGATCTGAGCCTGGGAGCTCTCTGGCTAACTAGGGAACCCACTGCTTAAGCCTCAATAAAGC  
TTGCCTTGAGTGCTTCAAGTAGTGTGTGCCCGTCTGTTGTGTGACTCTGGTAACTAGAGATCCCTCAGACC  
CTTTTAGTCAGTGTGGAAAATCTCTAGCAGTGGCGCCCGAACAGGGACCTGAAAGCGAAAGGGAAACCA  
GAGCTCTCTCGACGCAGGACTCGGCTTGCTGAAGCGCGCACGGCAAGAGGCGAGGGGCGGCGACTGGTG  
AGTACGCCAAAAATTTGACTAGCGGAGGCTAGAAGGAGAGAGATGGGTGCGAGAGCGTCAGTATTAAG  
CGGGGGAGAATTAGATCGCGATGGGAAAAAATTCGGTTAAGGCCAGGGGGAAAGAAAAAATATAAATTA  
AAACATATAGTATGGGCAAGCAGGGAGCTAGAACGATTTCGCAGTTAATCCTGGCCTGTTAGAAACATCAG  
AAGGCTGTAGACAAATACTGGGACAGCTACAACCATCCCTTCAGACAGGATCAGAAGAAGTTAGATCATT  
ATATAATACAGTAGCAACCCTCTATTGTGTGCATCAAAGGATAGAGATAAAAGACACCAAGGAAGCTTTA  
GACAAGATAGAGGAAGAGCAAAAACAAAAGTAAGACCACCGCACAGCAAGCGGCCGCTGATCTTCAGACC  
TGGAGGAGGAGATATGAGGGACAATTGGAGAAGTGAATTATATAAATATAAAGTAGTAAAAAATTGAACC  
ATTAGGAGTAGCACCCACCAAGGCAAAGAGAAGAGTGGTGCAGAGAGAAAAAAGAGCAGTGGGAATAG  
GAGCTTTGTTTCCTTGGGTTCTTGGGAGCAGCAGGAAGCACTATGGGCGCAGCCTCAATGACGCTGACGGT  
ACAGGCCAGACAATTATTGTCTGGTATAGTGCAGCAGCAGAACAATTTGCTGAGGGCTATTGAGGGCGCAA  
CAGCATCTGTTGCAACTCACAGTCTGGGGCATCAAGCAGCTCCAGGCAAGAATCCTGGCTGTGGAAAGAT  
ACCTAAAGGATCAACAGCTCCTGGGGATTTGGGGTTGCTCTGGAAAACCTATTTGCACCACTGCTGTGCCT  
TGGAATGCTAGTTGGAGTAATAAATCTCTGGAACAGATTTGGAATCACACGACCTGGATGGAGTGGGACA  
GAGAAATTAACAATTACACAAGCTTAATACTCCTTAATTGAAGAATCGCAAAAACCAGCAAGAAAAGA  
ATGAACAAGAATTATTGGAATTAGATAAATGGGCAAGTTTGTGGAATTGGTTTAAACATAACAAATTGGCT  
GTGGTATATAAAATTTATCATAATGATAGTAGGAGGCTTGGTAGGTTTAAAGAATAGTTTTTGTGCTACTTT  
CTATAGTGAATAGAGTTAGGCAGGGATATTCACCATTATCGTTTCAGACCCACCTCCCAACCCCGAGGGG  
ACCCGACAGGCCCGAAGGAATAGAAGAAGAAGGTGGAGAGAGAGACAGAGACAGATCCATTCGATTAG  
TGAACGGATCTCGACGGTATCGGTTAACTTTTTAAAGAAAAGGGGGGATTGGGGGTACAGTGCAGGGG  
AAAGAATAGTAGACATAATAGCAACAGACATACAACTAAAGAATTACAAAAACAATTACAAAAATTC  
AAAATTTTATCGATCACGAGACTAGCCTC



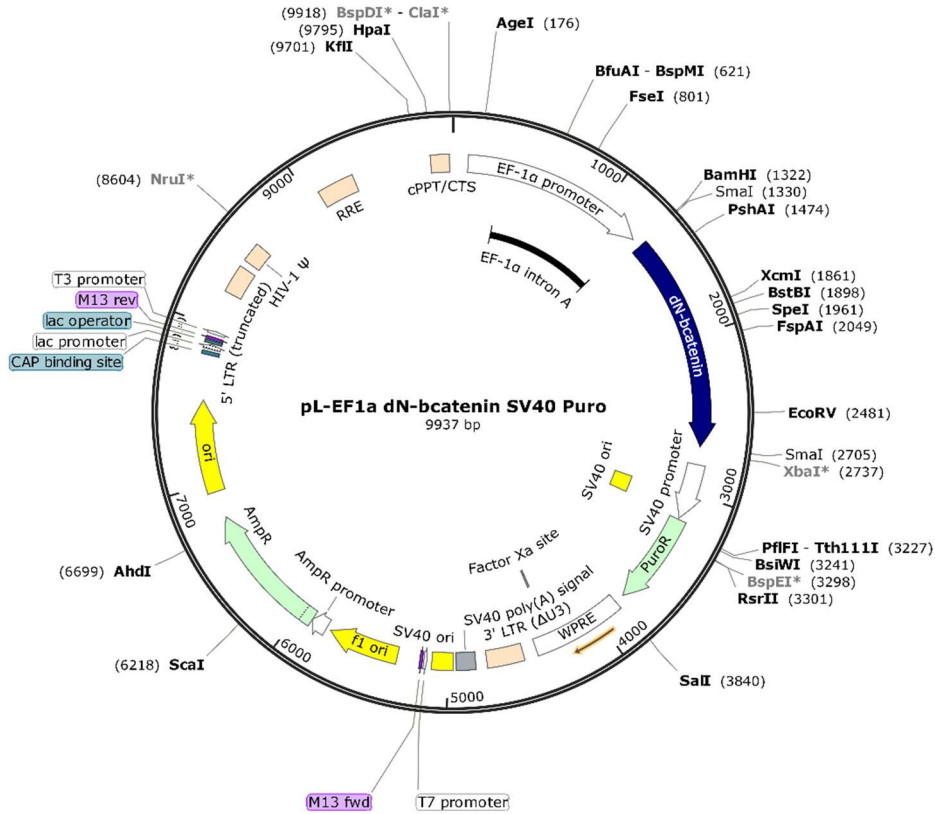

>pL-EF1a ΔN-βcatenin SV40 Puro

CTAGCCCCGATAAGCTTTGCAAAGATGGATAAAGTTTTAAACAGAGAGGAATCTTTGCAGCTAATGGACC  
 TTCTAGGTCTTGAAAGGAGTGGGAATTGGCTCCGGTGCCCGTCAGTGGGCAGAGCGCACATCGCCACAG  
 TCCCCGAGAAGTTGGGGGGAGGGGTTCGGCAATTGAACCGGTGCCTAGAGAAGGTGGCGCGGGGTAAACT  
 GGGAAAGTGATGTCGTGTACTGGCTCCGCCTTTTTCCCGAGGGTGGGGGAGAACCCTATATAAGTGCAGT  
 AGTCGCCGTGAACGTTCTTTTCGCAACGGGTTTGCCGCCAGAACACAGGTAAGTGCCGTGTGTGGTTCCC  
 GCGGGCCTGGCCTCTTTACGGGTTATGGCCCTTGCCTGCCTTGAATTACTTCCACTGGCTGCAGTACGTGA  
 TTCTTGATCCCGAGCTTCGGGTTGGAAGTGGGTGGGAGAGTTTCGAGGCCTTGCCTTAAGGAGCCCCTTC  
 GCCTCGTGCTTGAGTTGAGGCCTGGCCTGGGCGCTGGGGCCCGCGGTGCGAATCTGGTGGCACCTTCGC  
 GCCTGTCTCGCTGCTTTGATAAGTCTCTAGCCATTTAAAATTTTTGATGACCTGCTGCGACGCTTTTTTTC  
 TGGCAAGATAGTCTTGTAATGCGGGCCAAGATCTGCACACTGGTATTTTCGGTTTTTGGGGCCGCGGGCG  
 GCGACGGGGCCCGTGCGTCCCAGCGCACATGTTTCGGCGAGGCGGGGCCTGCGAGCGCGGCCACCGAGAA  
 TCGGACGGGGGTAGTCTCAAGCTGGCCGGCCTGCTCTGGTGCCTGGCCTCGCGCCCGCGTGTATCGCCCC  
 GCCCTGGGCGGCAAGGCTGGCCCGGTTCGGCACCAGTTGCGTGAGCGGAAAGATGGCCGCTTCCCGGCCCT  
 GCTCGAGGGAGCTCAAAATGGAGGACCGCGCGCTCGGGAGAGCGGGCGGGTGGAGTCAACCCACACAAAAG  
 GAAAAGGGCCTTCCGTCCTCAGCCGCTCATGTGACTCCACGGAGTACCGGCGCGCCGCTCCAGGCAC  
 CTCGATTAGTTCTCGAGCTTTTGGAGTACGTCGCTTTTAGGTTGGGGGAGGGTTTTATGCGTATGGAGTT  
 TCCCCACACTGACTGGGTGGAGACTGAAGTTAGCCAGCTTGGCACTTGATGTAATTCTCCTTGAATTTG  
 CCCTTTTTGAGTTTGATCTTGTTTCAATCTCAAGCCTCAGACAGTGGTTCAAAGTTTTTTTTCTTCCATTT  
 AGGTGTCGTGAGGAATTCTGCAGTCGATCGACGGTACCGCGGGCCCTCCGCGGCCGCGGATCCCCGGGC  
 CACATGAGGACCTACACTTATGAGAAGCTTCTGTGGACCACAAGCAGAGTGCTGAAGGTGCTGTCTGTCT  
 GCTCTAGCAACAAGCCGGCCATTGTAGAAGCTGGTGGGATGCAGGCACTGGGGCTTCATCTGACAGACCC  
 AAGTCAGCGACTTGTTCAAACTGTCTTTGGACTCTCAGAAACCTTTCAGATGCAGCGACTAAGCAGGAA  
 GGGATGGAAGGCCTCCTTGGGACTCTAGTGCAGCTTCTGGGTTCCGATGATATAAATGTGGTACCTGTG  
 CAGCTGGAATTCTCTAACCTCACTTGAATAATTACAAAACAAGATGATGGTGTGCCAAGTGGGTGG  
 CATAGAGGCTCTTGACGACCCGTCCTTCGTGCTGGTGACAGGGAAGACATCACTGAGCCTGCCATCTGT  
 GCTCTTCGTCATCTGACCAGCCGCATCAGGAAGCCGAGATGGCCCAGAATGCCGTTTCGCTTCAATTATG  
 GACTGCCTGTTGTGGTTAAACTCCTGCACCCACCATCCACTGGCCTCTGATAAAGGCAACTGTTGGATTG  
 ATTCGAAACCTTGCCCTTTGCCAGCAAATCATGCGCCTTTCGCGGAACAGGGTGCTATTCCACGACTAGT  
 TCAGCTGCTTGTACGAGCACATCAGGACACCAACGGCGCACCTCCATGGGTGGAACGCAGCAGCAGTTT  
 GTGGAGGGCGTGCGCATGGAGGAGATAGTAGAAGGGTGTACTGGAGCTCTCCACATCCTTGCTCGGGAC  
 GTTCAACAACCGGATTGTAATCCGAGGACTCAATACCATTCCATTGTTTGTGCAGTTGCTTTATTCTCCATT  
 GAAAATATCCAAGAGTAGCTGCAGGGGTCTCTGTGAACTTGCTCAGGACAAGGAGGCTGCAGAGGCC

ATTGAAGCTGAGGGAGCCACAGCTCCCCTGACAGAGTTACTCCACTCCAGGAATGAAGGCGTGGCAACAT  
ACGCAGCTGCTGTCCTATTCCGAATGTCTGAGGACAAGCCACAGGATTACAAGAAGCGGCTTTCAGTCTGA  
GCTGACCAGTTCCTCTTCAGGACAGAGCCAATGGCTTGGAAATGAGACTGCAGATCTTGGACTGGACATT  
GGTGCCAGGGAGAAGCCCTTGATATCGCCAGGATGATCCCAGCTACCGTTCTTTTACTCTGGTGGAT  
ACGGCCAGGATGCCTTGGGGATGGACCCTATGATGGAGCATGAGATGGGTGGCCACCACCCTGGTGTGA  
CTATCCAGTTGATGGGCTGCCTGATCTGGGACACGCCAGGACCTCATGGATGGGCTGCCCCAGGTGAT  
AGCAATCAGCTGGCCTGGTTTGATACTGACCTGTAACCCGGGGAATTCCTCGAGAAGCTGGGGCTCGAGA  
TCTAGAGTCGAGAAGCTTGATGATCTGCGCAGCACCATGGCCTGAAATAACCTCTGAAAGAGGAACTTGG  
TTAGGTACCTTCTGAGGCGGAAAGAACCAGCTGTGGAATGTGTGTCAGTTAGGGTGTGGAAAGTCCCCAG  
GCTCCCCAGCAGGCAGAAGTATGCAAAGCATGCATCTCAATTAGTCAGCAACCAGGTGTGGAAAGTCCCC  
AGGCTCCCCAGCAGGCAGAAGTATGCAAAGCATGCATCTCAATTAGTCAGCAACCATAGTCCCCGCCCTA  
ACTCCGCCATCCCCGCCCTAACTCCGCCAGTTCGCCCATTTCTCCGCCCATGGCTGACTAATTTTTTTT  
ATTTATGCAGAGGCCGAGCCGCTCGCCTCTGAGCTATTCCAGAAGTAGTGAGGAGGCTTTTTTTGGAG  
GCCTAGGCTTTTGCAAAAAGCTTACCATGACCGAGTACAAGCCCACGGTGCCTCGCCACCCGCGACGA  
CGTCCCCAGGGCCGTACGCACCCTCGCCGCCGCTTCGCCGACTACCCGCCACGCGCCACACCGTCGAT  
CCGGACCGCCACATCGAGCGGGTCAACGAGCTGCAAGAACTTTCCTCACGCGCGTCCGGCTCGACATCG  
GCAAGGTGTGGGTGCGCGACGACGGCGCCGCGGTGGCGGTCTGGACCACGCCGAGAGCGTCAAGCGG  
GGGCGGTGTTTCGCCGAGATCGGCCCGCGCATGGCCGAGTTGAGCGGTTCCCGGCTGGCCGCGCAGCAACA  
GATGGAAGGCCTCCTGGCGCCGACCCGGCCAAGGAGCCCGCGTGGTTTCTGGCCACCGTCCGGCTCTCG  
CCCGACCACCAGGGCAAGGGTCTGGGCAGCGCCGTCGTGCTCCCCGGAGTGGAGGCGCCGAGCGCGCC  
GGGGTGCCCGCCTTCTGGAGACCTCCGCGCCCCGCAACCTCCCCTTCTACGAGCGGCTCGGCTTACCCT  
CACCGCCGACGTCGAGTGCCCGAAGGACCGCGCACCTGGTGCATGACCCGCAAGCCCGGTGCCTGACG  
CCCGCCCCACGACCCGACGCGCCGACCAGAAAGGAGCGCACGACCCCATGCCAGTCGACAATCAACCTCT  
GGATTACAAAATTTGTAAAGATTGACTGGTATTCTTAATACTATGTTGCTCCTTTTACGCTATGTGGATACG  
CTGCTTTAATGCCTTTGTATCATGCTATTGCTTCCCGTATGGCTTTCATTTTCTCCTCCTTGTATAAATCCTG  
GTTGCTGTCTCTTTATGAGGAGTTGTGGCCCGTTGTGAGGCAACGTGGCGTGGTGTGCACTGTGTTTGGT  
ACGCAACCCCACTGGTTGGGGCATTGCCACCACCTGTCAGCTCCTTCCGGGACTTTCGCTTCCCCCTC  
CCTATTGCCACGGCGGAACATCGCCGCTGCCTTGCCCGCTGCTGGACAGGGGCTCGGCTGTTGGGCA  
CTGACAATTCGGTGGTGTGTCGGGGAAGCTGACGTCCTTTCATGGCTGCTCGCCTGTGTTGCCACCTGG  
ATTCTGCGCGGGACGTCCTTCTGCTACGTCCTTTCGGCCCTCAATCCAGCGGACCTTCTTCCCGCGGCT  
GCTGCCGGCTCTGCGGCCTTTCGCGTCTTCGCCTTCGCCCTCAGACGAGTCGGATCTCCCTTGGGGCCG  
CCTCCCCGCTGGAATTCGAGCTCGGTACCTTTAAGACCAATGACTTACAAGGCAGCTGTAGATCTTAGCC  
ACTTTTTAAAAGAAAAGGGGGGACTGGAAGGGCTAATTCCTCCAACGAAGACAAGATCTGCTTTTTGC  
TTGTAAGCCTCAATAAAGCTTGCCTTGAGTGCTTCAAGTAGTGTGTGCCCCGTGTGTGTGACTCTGGTAAC  
TAGAGATCCCTCAGACCCCTTTAGTCAAGTGTGAAAATCTCTAGCAGTAGTAGTTTCATGTCATCTTATTAT  
TCAGTATTTATAACTTGCAAAGAAATGAATATCAGAGAGTGAGAGGAACTTGTTTATTGCAGCTTATAAT  
GGTTACAAATAAAGCAATAGCATCACAAATTCACAAATAAAGCATTTTTTTACTGCATTCTAGTTGTGG  
TTGTCCAAACTCATCAATGTATCTTATCATGTCTGGCTCTAGCTATCCCGCCCCTAACTCCGCCAGTTCC  
GCCATTCTCCGCCCATGGCTGACTAATTTTTTTTTATTTATGCAGAGGGCCGAGGCCGCCTCGGCCTCTGA  
GCTATTCCAGAAGTAGTGAGGAGGCTTTTTTGGAGGCCTAGGCTTTTGCGTGCGAGACGTACCCAATTCGCC  
CTATAGTGAGTCGTATTACGCGCGCTCACTGGCCGTCGTTTTACAACGTCGTGACTGGGAAAACCCTGGC  
GTTACCCAATTAATCGCCTTGCAGCACATCCCCCTTTCGCCAGCTGGCGTAATAGCGAAGAGGCCCGCA  
CCGATCGCCCTTCCCAACAGTTGCGCAGCCTGAATGGCGAATGGCGCGACGCGCCCTGTAGCGGCGCATT  
AAGCGCGGCGGGTGTGGTGGTTACGCGCAGCGTGACCGCTACACTTGCCAGCGCCCTAGCGCCCGCTCCT  
TTCGCTTTCTCCCTTCTTCTCGCCACGTTCCCGGCTTCCCCCGTCAAGCTCTAAATCGGGGGCTCCCT  
TTAGGGTTCCGATTTAGTGCTTTACGGCACCTCGACCCCAAAAACTTGATTAGGGTGTGGTTACGCTAG  
TGGGCCATCGCCCTGATAGACGGTTTTTTCGCCCTTTCGAGTTGGAGTCCACGTTCTTTAATAGTGGACTCT  
TGTTCCAAACTGGAACAACACTCAACCCTATCTCGGTCTATTCTTTGATTATAAGGGATTTTGCCGATTT  
CGGCCTATTGGTTAAAAAATGAGCTGATTTAACAAAAATTAACGCGAATTTTAACAAAATATTAACGTT  
TACAATTTCCAGGTGGCACTTTTCGGGGAAATGTGCGCGGAACCCCTATTTGTTATTTTTCTAAATACA  
TTCAAATATGTATCCGCTCATGAGACAATAACCCTGATAAATGCTTCAATAATATTGAAAAAGGAAGAGT  
ATGAGTATTCACATTTCCGTGTCGCCCTTATCCCTTTTTTGCGGCATTGTCCTTCTGTTTTGCTCACC  
CAGAAACGCTGGTGAAGTAAAAGATGCTGAAGATCAGTTGGGTGCACGAGTGGGTACATCGAACTGG  
ATCTCAACAGCGGTAAAGATCCTTGAGAGTTTTTCGCCCGAAGAACGTTTTCCAATGATGAGCACTTTTAAA  
GTTCTGCTATGTGGCGCGGTATTATCCCGTATTGACGCCGGGCAAGAGCAACTCGGTCCCGCATACTACT  
ATTCTCAGAAAGACTTGGTTGAGTACTCACCAGTACAGAAAAGCATCTTACGGATGGCATGACAGTAAG  
AGAATTATGCAGTGTGCCATAACCATGAGTGATAACACTGCGGCCAACTTACTTCTGACAACGATCGGA  
GGACCGAAGGACTAACCGCTTTTTTGCACAACATGGGGGATCATGTAACCTGCCTTGTATCGTTGGGAAC  
CGGAGCTGAATGAAGCCATACCAAACGACGAGCGTGACACCACGATGCCTGTGCAATGGCAACAACGT  
TGCGCAAATAAATACTGGCGAACTACTTACTTAGCTTCCCGGCAACAATAATAGACTGGATGGAGGC  
GGATAAAGTTGCAGGACCACTTCTGCGCTCGGCCCTTCCGGCTGGCTGGTTTATTGCTGATAAATCTGGAG

CCGGTGAGCGTGGGTCTCGCGGTATCATTGCAGCACTGGGGCCAGATGGTAAGCCCTCCCGTATCGTAGT  
TATCTACACGACGGGGAGTCAGGCAACTATGGATGAACGAAATAGACAGATCGCTGAGATAGGTGCCTC  
ACTGATTAAGCATTGGTAACTGTCAGACCAAGTTTACTCATATATACTTTAGATTGATTTAAAACCTTCATT  
TTAATTTAAAAGGATCTAGGTGAAGATCCTTTTTGATAATCTCATGACCAAAATCCCTTAACGTGAGTTT  
TCGTTCCACTGAGCGTCAGACCCCGTAGAAAAGATCAAAGGATCTTCTTGAGATCCTTTTTTTCTGCGCGT  
AATCTGCTGCTTGCAAACAAAAAACCCGCTACCAGCGGTGGTTTGTGGCCGATCAAGAGCTACCA  
ACTCTTTTTCCGAAGGTAACCTGGCTTCAGCAGAGCGCAGATACCAAATACTGTCTTCTAGTGTAGCCGTA  
GTTAGGCCACCACTTCAAGAACTCTGTAGCACCGCTACATACTCGCTCTGCTAATCCTGTTACCAGTGG  
CTGCTGCCAGTGGCGATAAGTCGTGTCTTACCGGGTTGGACTCAAGACGATAGTTACCGGATAAGGCGCA  
GCGGTGCGGGCTGAACGGGGGGTTCGTGCACACAGCCAGCTTGGAGCGAACGACCTACACCGAACTGAG  
ATACCTACAGCGTGAAGCTATGAGAAAGCGCCACGCTTCCCGAAGGGAGAAAGGCGGACAGGTATCCGGT  
AAGCTGCAGGTCGGAACAGGAGAGCGCACGAGGGAGCTTCCAGGGGAAACGCGCTGGTATCTTTATAG  
TCTGTGCGGGTTTCGCCACCTCTGACTGTAGCTGAGCTCGATTTTTGTGATGCTCGTCAGGGGGCGGAGCCTAT  
GGAAAACGCCAGCAACGCGGCCTTTTTACGGTTCCTGGCCTTTTGCTGGCCTTTTGCTCACATGTTCTTTC  
CTGCGTTATCCCCTGATTCTGTGGATAACCGTATTACCGCCTTTGAGTGAGCTGATACCGCTCGCCGACG  
CGAACGACCCGAGCGCAGCGAGTCAGTGAGCGAGGAAGCGGAAGAGCGCCCAATACGCAAACCGCCTCTC  
CCCGCGGTTGGCCGATTCAATTAATGCAGCTGGCACGACAGGTTTCCCGACTGGAAAGCGGGCAGTGAGC  
GCAACGCAATTAATGTGAGTTAGCTCACTCATTAGGCACCCAGGCTTTACTCTTTATGCTTCCGGCTCGT  
ATGTTGTGTGGAATTGTGAGCGGATAACAATTTACACAGGAAACAGCTATGACCATGATTACGCCAAGC  
GCGCAATTAACCTCACTAAAGGGAACAAAAGCTGGAGCTGCAAGCTTAATGTAGTCTTATGCAATACTC  
TTGTAGTCTTGCAACATGGTAACGATGAGTTAGCAACATGCCTTACAAGGAGAGAAAAAGCACCGTGCAT  
GCCGATTGGTGGAAGTAAGGTGGTACGATCGTGCCTTATTAGGAAGGCAACAGACGGGTCTGACATGGAT  
TGGACGAACCACTGAATTGCCGCATTGCAGAGATATTGTATTTAAGTGCCTAGCTCGATAACAATAACGG  
GTCTCTCTGGTTAGACCAGATCTGAGCCTGGGAGCTCTCTGGCTAACTAGGGAACCCACTGCTTAAGCCTC  
AATAAAGCTTGCTTGAGTGCTTCAAGTAGTGTGTGCCCGTCTGTTGTGTGACTCTGGTAACTAGAGATCC  
CTCAGACCCTTTTAGTCAGTGTGGAAAATCTCTAGCAGTGGCGCCCGAACAGGGACCTGAAAGCGAAAGG  
GAAACCAGAGCTCTCTCGACGCAGGACTCGGCTTGCTGAAGCGCGCACGGCAAGAGGCGAGGGGGCGGCG  
ACTGGTGAGTACGCCAAAAATTTGACTAGCGGAGGCTAGAAGGAGAGAGATGGGTGCGAGAGCGTCAG  
TATTAAGCGGGGGAGAATTAGATCGCGATGGGAAAAAATTCGGTTAAGGCCAGGGGGGAAAGAAAAAATA  
TAAATTAACATATAGTATGGGCAAGCAGGGAGCTAGAACGATTTCGAGTTAATCCTGGCCTGTTAGAA  
ACATCAGAAGGCTGTAGACAAATACTGGGACAGCTACAACCATCCCTTCAGACAGGATCAGAAGAACTT  
AGATCATTATATAATACAGTAGCAACCCTCTATTGTGTGCATCAAAGGATAGAGATAAAAGACACCAAGG  
AAGCTTTAGACAAGATAGAGGAAGAGCAAAACAAAAGTAAGACCACCGCACAGCAAGCGGCCGCTGATC  
TTCAGACCTGGAGGAGGAGATATGAGGGACAATTGGAGAAGTGAATTATATAAATATAAAGTAGTAAAA  
ATTGAACCATTAGGAGTAGCACCCACCAAGGCAAAGAGAAGAGTGGTGCAGAGAGAAAAAAGAGCAGT  
GGGAATAGGAGCTTTGTTCTTGGGTTCTTGGGAGCAGCAGGAAGCACTATGGGCGCAGCCTCAATGACG  
CTGACGGTACAGGCCAGACAATTATTGTCTGGTATAGTGCAGCAGCAGAACAATTTGCTGAGGGCTATTG  
AGGCGCAACAGCATCTGTTGCAACTCACAGTCTGGGGCATCAAGCAGCTCCAGGCAAGAATCCTGGCTGT  
GGAAAGATACCTAAAGGATCAACAGCTCCTGGGGATTGGGGTTGCTCTGGAAAACCTCATTGCAACCACT  
GCTGTGCCCTTGGAATGCTAGTTGGAGTAATAAATCTCTGGAACAGATTTGGAATCACACGACCTGGATGG  
AGTGGGACAGAGAAATTAACAATTACACAAGCTTAATACTCCTTAATTGAAGAATCGCAAAACAGC  
AAGAAAAGAATGAACAAGAATTATTGGAATTAGATAAATGGGCAAGTTTGTGGAATTGGTTTAACATAA  
CAAATTGGCTGTGGTATATAAAATTATTCATAATGATAGTAGGAGGCTTGGTAGGTTTAAGAATAGTTTTT  
GCTGTACTTTCTATAGTGAATAGAGTTAGGCAGGGATATTACCATTATCGTTTCAGACCCACCTCCCAAC  
CCCGAGGGGACCCGACAGGCCCGAAGGAATAGAAGAAGAAGGTGGAGAGAGAGACAGAGACAGATCCA  
TTCGATTAGTGAACGGATCTCGACGGTATCGGTAACTTTTTAAAAGAAAAGGGGGGATTGGGGGTACAG  
TGCAGGGGAAAGAATAGTAGACATAATAGCAACAGACATACAAACCTAAAGAATTACAAAAACAAATTAC  
AAAAATCAAAATTTTATCGATCACGAGACTAGCCTC

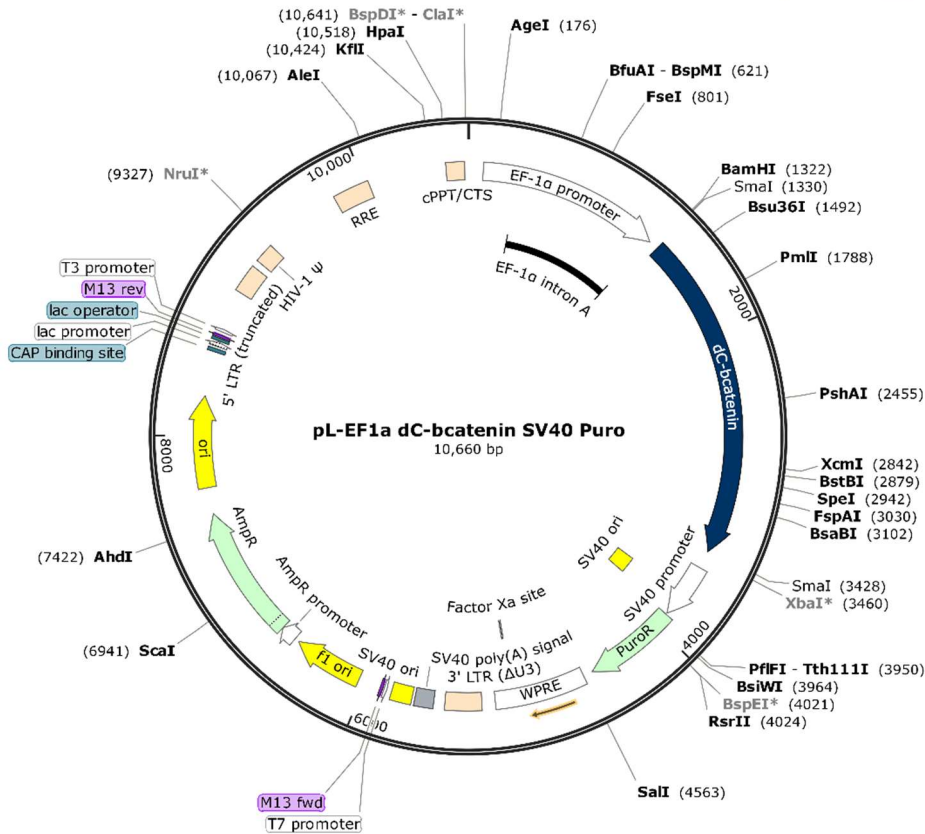

**>pL-EF1a ΔC-βcatenin SV40 Puro**

CTAGCCCCGATAAGCTTTGCAAAGATGGATAAAGTTTTAAACAGAGAGGAATCTTTGCAGCTAATGGACC  
 TTCTAGGTCTTGAAAGGAGTGGGAATTGGCTCCGGTGCCTCAGTGGGCAGAGCGCACATCGCCACAG  
 TCCCCGAGAAGTTGGGGGGAGGGTTCGGCAATTGAACCGGTGCCTAGAGAAGGTGGCGCGGGGTAAACT  
 GGGAAAGTGTATGTCGTGTACTGGCTCCGCCTTTTTCCCGAGGGTGGGGGAGAACCCTATATAAGTGCAGT  
 AGTCGCCGTGAACGTTCTTTTTTCGCAACGGGTTTCCCGCCAGAACACAGGTAAGTGCCTGTGTGGTTCCC  
 GCGGGCCTGGCCTTTTACGGGTTATGGCCCTTTCGCTGCCATTGAATTACTTCCACTGGCTGCAGTACGTGA  
 TTCTTGATCCCAGCTTCGGGTTGAAAGTGGGTGGGAGAGTTCGAGGCCTTGCCTTAAGGACCCCTTC  
 GCCTCGTGCTTGAGTTGAGGCTGGCCTGGGCGCTGGGGCCCGCGTGCGAATCTGGTGGCACCTTCGC  
 GCCTGTCTCGCTGCTTTTCGATAAGTCTCTAGCCATTTAAAATTTTTGATGACCTGCTGCGACGCTTTTTTTC  
 TGGCAAGATAGTCTTGTAATGCGGGCCAAGATCTGCACACTGGTATTTTCGGTTTTTGGGGCCGCGGGCG  
 GCGACGGGGCCCGTGCCTCCAGCGCACATGTTTCGGCGAGGCGGGGCCTGCGAGCGCGGCCACCGAGAA  
 TCGGACGGGGGTAGTCTCAAGCTGGCCGGCCTGCTCTGGTGCCTGGCCTCGCGCCCGCGTGTATCGCCCC  
 GCCCTGGGCGGCAAGGCTGGCCCGTTCGGCACCAAGTTCGCTGAGCGGAAAGATGGCCGCTTCCCGGCCCT  
 GCTGCAGGGAGCTCAAAATGGAGGACGCGGCGCTCGGGAGAGCGGGCGGGTGTGATCACCCACACAAAG  
 GAAAAGGGCCTTTCCGTCCTCAGCCGTCGCTTCATGTGACTCCACGGAGTACCGGGCGCCGTCCAGGCAC  
 CTCGATTAGTTCTCGAGCTTTTGGAGTACGTCGCTTTAGGTTGGGGGAGGGGTTTTATGCGATGGAGTT  
 TCCCCACACTGAGTGGGTGGAGACTGAAGTTAGGCCAGCTTGGCACTTGATGTAATTCTCCTTGGAATTTG  
 CCCTTTTTGAGTTTGGATCTTGTTTATTCTCAAGCCTCAGACAGTGGTTCAAAGTTTTTTTTCTTCCATTT  
 AGGTGTCGTGAGGAATTCTGCAGTCGATCGACGGTACCGCGGGCCCTCCGCGGCCGCGGATCCCCGGGC  
 CACATGGCTACTCAAGCTGACCTGATGGAGTTGGACATGGCCATGGAGCCGGACAGAAAAGCTGCTGTCA  
 GCCACTGGCAGCAGCAGTCTTACTTGGATTCTGGAATCCATTCTGGTGCCACCACCACAGCTCCTTCCCTG  
 AGTGGAAGGGCAACCCTGAGGAAGAAGATGTTGACACCTCCCAAGTCTTTATGAATGGGAGCAAGGC  
 TTTTCCAGTCTTACGCAAGAGCAAGTAGCTGATATTGACGGGCAGTATGCAATGACTAGGGCTCAGA  
 GGGTCCGAGCTGCCATGTTCCCTGAGACGCTAGATGAGGGCATGCAGATCCCATCCACGCAGTTTGACGC  
 TGCTCATCCACTAATGTCCAGCGCTTGGCTGAACCATCACAGATGTTGAAACATGCAGTTGTCAATTTGA  
 TTAATATCAGGATGACGCGGAACCTGCCACACGTGCAATTCCTGAGCTGACAAAACGCTAAACGATGA  
 GGACCAGGTGGTAGTTAATAAAGCTGCTGTTATGGTCCATCAGCTTTCCAAAAGGAAGCTTCCAGACAT  
 GCCATCATGCGCTCCCTCAGATGGTGTCTGCACTTGTACGCACCATGCAGAATACAAATGATGTAGAGA  
 CAGCTCGTTGTACTGCTGGGACTCTGCACAACCTTTCTACCACCGCGAGGGCTTGTCTGGCCATCTTTAAG  
 TCTGGTGGCATCCGACGCTGGTGAATAATGCTTGGTCCACAGTGGATTCTGTACTGTCTTACGCCATCAC  
 GACACTGCATAATCTCCTGCTCCATCAGGAAGGAGCTAAAATGGCAGTGCCTAGCTGGTGGACTGCAG  
 AAAATGGTTGCTTTGCTCAACAAAACAAACGTGAAATTTTGGCTATTACAACAGACTGCCTTCAGATCTT

AGCTTATGGCAATCAAGAGAGCAAGCTCATCATTCTGGCCAGTGGTGGACCCCAAGCCTTAGTAAACATA  
ATGAGGACCTACACTTATGAGAAGCTTCTGTGGACCACAAGCAGAGTGCTGAAGGTGCTGTCTGTCTGCT  
CTAGCAACAAGCCGGCCATTGTAGAAGCTGGTGGGATGCAGGCACTGGGGCTTCATCTGACAGACCCAA  
GTCAGCGACTTGTTCAAACCTGTCTTTGGACTCTCAGAAACCTTTCAGATGCAGCGACTAAGCAGGAAGG  
GATGGAAGGCTCCTTGGGACTCTAGTGCAGCTTCTGGGTTCCGATGATATAAATGTGGTCACTGTGCA  
GCTGGAATTCTCTCTAACCTCACTTGCAATAATTACAAAAACAAGATGATGGTGTGCCAAGTGGGTGGCA  
TAGAGGCTCTTGTACGCACCGTCCTTCGTGCTGGTGACAGGGAAGACATCACTGAGCCTGCCATCTGTGCT  
CTTCGTCACTGACCAGCCGGCATCAGGAAGCCGAGATGGCCCAGAATGCCGTTCCGCTTCATTATGGAC  
TGCCTGTTGTGGTTAAACTCCTGCACCCACCATCCCCTGGCCTCTGATAAAGGCAACTGTTGGATTGATT  
CGAAACCTTGCCCTTTGCCAGCAAATCATGCGCCTTTGCGGGAACAGGGTGCTATTCCACGACTAGTTCA  
GCTGCTTGTACGAGCACATCAGGACACCCAAACGGCGCACCTCCATGGGTGGAACGCAGCAGCAGTTTGTG  
GAGGGCGTGCATGGAGGAGATAGTAGAAGGGTGTACTGGAGCTCTCCACATCCTTGCTCGGGACGTTT  
ACAACCGGATTGTAATCCGAGGACTCAATAACCATTCATTGTTTGTGCAGTTGCTTTATTCTCCATTGAA  
AATATCCAAGAGTAGCTGCAGGGGTCTCTGTGAACTTGTCTCAGGACAAGGAGGCTGCAGAGGCCATTG  
AAGCTGAGGGAGCCACAGCTCCCCTGACAGAGTTACTCCACTCCAGGAATGAAGGCGTGGCAACATACG  
CAGCTGCTGTCCTATTCCGAATGTCTGAGGACAAGCCACAGGATTACAAGAAGCGGCTTTCAGTCGAGCT  
GACCAGTTCCTCTTCAGGACAGAGCCAATGGCTTGGAAATGAGACTGCAGATTAACCCGGGGAATTCCTC  
GAGAAGCTGGGGCTCGAGATCTAGAGTCGAGAAGCTTGATGATCTGCGCAGCACCATGGCCTGAAATAA  
CCTCTGAAAGAGGAACTTGGTTAGGTACCTTCTGAGGCGGAAAGAACCAGCTGTGGAATGTGTGTCAGTT  
AGGGTGTGGAAGTCCCAGGCTCCCAGCAGGCAGAAGTATGCAAAGCATGCATCTCAATTAGTCAGC  
AACCAGGTGTGGAAGTCCCAGGCTCCCAGCAGGCAGAAGTATGCAAAGCATGCATCTCAATTAGTCA  
GCAACCATAGTCCCGCCCCTAACTCCGCCATCCCGCCCCTAACTCCGCCAGTTCGCCCATTCTCCGCC  
CCATGGCTGACTAATTTTTTTTTATTTATGCAGAGGCGGAGGCCGCTCGGCCTCTGAGCTATTCCAGAAGT  
AGTGAGGAGGCTTTTTTGGAGGCCTAGGCTTTTGCAAAAAGCTTACCATGACCAGGTACAAGCCCACGGT  
GCGCCTCGCCACCCGCGACGACGTCCCAGGGCCGTACGCACCCTCGCCGCGCGTTTCGCCGACTACCCC  
GCCACGCGCCACACCGTCGATCCGGACCGCCACATCGAGCGGGTCACCGAGCTGCAAGAACTCTTCCTCA  
CGCGCTCGGGCTCGACATCGGCAAGGTGTGGGTGCGGGACGACGGCGCCGCGGTGGCGGTCTGGACCA  
CGCCGGAGAGCGTCAAGCGGGGGCGGTGTTCCGCCGAGATCGGCCCGCGCATGGCCGAGTTGAGCGGT  
CCCGGCTGGCCGCGCAGCAACAGATGGAAGGCCTCCTGGCGCCGACCCGGCCCAAGGAGCCCGCGTGGT  
TCCTGGCCACCGTCGGCGTCTCGCCCGACCACCAGGGCAAGGGTCTGGGCAGCGCCGTCGTGCTCCCCG  
AGTGAGGCGCGCCGAGCGCGCCGGGTGCCCGCCTTCTGGAGACCTCCGCGCCCCGCAACCTCCCCTTC  
TACGAGCGGCTCGGCTTACCGTCAACCGCCGACGTCGAGTGCCCGAAGGACCGCGCGACCTGGTGCATGA  
CCCGCAAGCCCGGTGCCTGACGCCCCGCCACGACCCGCGAGCGCCCGACCGAAAGGAGCGCACGACCCC  
ATGCCAGTCGACAATAACCTCTGGATTACAAAATTTGTGAAAGATTGACTGGTATTCTTAACTATGTTGC  
TCCTTTACGCTATGTGATAACCTGTTGCTGTCTCTTTATGAGGAGTTGTGGCCGTTGTCAGGCAACGTGG  
TTTCTCCTCCTGTATAAATCCTGTTGCTGTCTCTTTATGAGGAGTTGTGGCCGTTGTCAGGCAACGTGG  
CGTGGTGTGCACTGTGTTTGTGACGCAACCCCACTGGTTGGGGCATTGCCACCACCTGTGACGTCCTTT  
CCGGGACTTTCGCTTTCCCCCTCCCTATTGCCACGGCGGAACTCATCGCCGCTGCCTTGCCCGCTGCTGG  
ACAGGGGCTCGGCTGTTGGGCACTGACAATTCGTGGTGTGTCGGGGAAGCTGACGTCTTTCCATGGC  
TGCTCGCTGTGTTGCCACCTGGATTCTGCGCGGGACGTCCTTCTGCTACGTCCCTTCGGCCCTCAATCCA  
GCGGACCTTCTTCCCGCGGCTGCTGCCGGCTCTGCGGCCTTTCGCGCTTTCGCCTTCGCCCTCAGAC  
GAGTCGGATCTCCCTTTGGGCGCCTCCCCGCCTGGAATTCGAGCTCGGTACCTTTAAGACCAATGACTTA  
CAAGGCAGCTGTAGATCTTAGCCACTTTTTAAAAGAAAAGGGGGGACTGGAAGGGCTAATTCCTCCCAA  
CGAAGACAAGATCTGCTTTTTGCTTGTACTGGGTCTCTCTGGTTAGACCAGATCTGAGCCTGGGAGCTCTC  
TGGCTAACTAGGGAACCCACTGCTTAAGCCTCAATAAAGCTTGCCTTGAGTGCTTCAAGTAGTGTGTGCC  
GTCTGTTGTGACTCTGGTAACTAGAGATCCCTCAGACCCTTTTAGTCAGTGTGGAATACTCTAGCAGT  
AGTAGTTCATGTATCTTATTATTCAGTATTTATAACTTGCAAAGAAATGAATATCAGAGAGTGAGAGGA  
ACTTGTATTATGCAGCTTATAATGGTTACAAATAAAGCAATAGCATCACAAATTTACAAATAAAGCATT  
TTTTACTGCATTCTAGTTGTGGTTTGTCCAAACTCATCAATGTATCTTATCATGTCTGGCTCTAGCTATCC  
CGCCCTAACTCCGCCAGTTCCGCCATTCTCCGCCCATGGCTGACTAATTTTTTTTTATTATGCAGAGG  
CCGAGGCCGCTCGGCCTCTGAGCTATTCCAGAAGTAGTGAGGAGGCTTTTTTGGAGGCCTAGGCTTTTGC  
GTCGAGACGTACCCAATTCGCCCTATAGTGAGTCGATTACGCGCGCTCACTGGCCGTCGTTTTACAACGT  
CGTGACTGGGAAAACCCTGGCGTTACCCAATTAATCGCCTTGACGACATCCCCCTTCGCCAGCTGGCG  
TAATAGCGAAGAGGCCCGCACCGATCGCCCTTCCCAACAGTTGCGCAGCCTGAATGGCGAATGGCGCGAC  
GCGCCCTGACGCGCCGCTCCTTCGCTTTCTTCCCTTCTTCTCGCCACGTTCCGCCGCTTTCCCGTCAAG  
CTCTAAATCGGGGGCTCCCTTTAGGGTTCCGATTTAGTGCTTTACGGCACCTCGACCCCAAAAACCTGAT  
TAGGGTGTAGTTTACGATGAGGCACTGCGCCCTGATAGACGTTTTTTCGCCCTTTGACGTTGGAGTCCAC  
GTTCTTTAATAGTGGACTCTTGTTCCAAACCTGGAACAACACTCAACCTATCTCGGTCTATTCTTTGATTT  
ATAAGGGATTTTCCGATTTCCGCCATTGGTTAAAAAATGAGCTGATTTAACAATAAATTAACGCGAAT  
TTAACAATAATTAACGTTTACAATTTCCAGGTGGCACTTTTCGGGGAATGTGCGCGGAACCCCTATT  
TGTTATTTTTCTAAATACATTCAAATATGTATCCGCTCATGAGACAATAACCCTGATAAATGCTTCAATA

ATATTGAAAAAGGAAGAGTATGAGTATTCAACATTTCCGTGTCGCCCTTATTCCCTTTTTTTCGGCATT  
GCCTTCCTGTTTTTGCTCACCCAGAAACGCTGGTGAAGTAAAAGATGCTGAAGATCAGTTGGGTGCACG  
AGTGGGTACATCGAACTGGATCTCAACAGCGGTAAGATCCTTGAGAGTTTTCCGCCCGAAGAACGTTTT  
CCAATGATGAGCACTTTAAAGTTCTGCTATGTGGCGCGGTATTATCCCGTATTGACGCCGGGCAAGAGC  
AACTCGGTGCGCCATACACTATTCTCAGAATGACTTGGTTGAGTACTCACCAGTACAGAAAAAGCATCT  
TACGGATGGCATGACAGTAAGAGAATTATGCAGTGCTGCCATAACCATGAGTGATAACACTGCGGCCAAC  
TACTTCTGACAACGATCGGAGGACCGAAGGAGCTAACCGTTTTTTGCACAACATGGGGGATCATGTAA  
CTCGCTTGATCGTTGGGAACCGGAGCTGAATGAAGCCATACCAAACGACGAGCGTGACACCACGATGCC  
TGTAGCAATGGCAACAACGTTGCGCAAACCTATTAAGTGGCGAACTACTTACTCTAGCTTCCCGGCAACA  
TTAATAGACTGGATGGAGGCGGATAAAGTTGCAGGACCACTTCTGCGCTCGGCCCTCCGGCTGGCTGGT  
TTATTGCTGATAAATCTGGAGCCGGTGAGCGTGGGTCTCGCGGTATCATTGCAGCACTGGGGCCAGATGG  
TAAGCCCTCCCGTATCGTAGTTATCTACACGACGGGAGTCAGGCAACTATGGATGAACGAAATAGACAG  
ATCGCTGAGATAGTGCCTCACTGATTAAGCATTGGTAACTGTCAGACCAAGTTTACTCATATATACTTTA  
GATTGATTTAAAATTCATTTTTAATTTAAAAGGATCTAGGTGAAGATCCTTTTTGATAATCTCATGACCA  
AAATCCCTAACGTGAGTTTTCTGTTCCACTGAGCGTCAGACCCCGTAGAAAAGATCAAAGGATCTTCTTG  
AGATCCTTTTTTCTGCGCTAATCTGCTGCTTGCAAACAAAAAAACCACCGCTACCAGCGGTGGTTTGT  
TGCCGGATCAAGAGCTACCAACTCTTTTTCCGAAGGTAAGTGGCTTCAGCAGAGCGCAGATACCAAATAC  
TGTCCTTCTAGTGTAGCCGTAGTTAGGCCACCACTTCAAGAACTCTGTAGCACCGCCTACATACCTCGCTC  
TGCTAATCCTGTTACCAGTGGCTGCTGCCAGTGGCGATAAGTCGTGTCTTACCGGGTTGGACTCAAGACG  
ATAGTTACCGGATAAAGGCGCAGCGGTCGGGCTGAACGGGGGGTTCGTGCACACAGCCCAGCTTGGAGCG  
AACGACCTACACCGAACTGAGATACCTACAGCGTGAGCTATGAGAAAGCGCCACGCTTCCCGAAGGGAG  
AAAGGCGGACAGGTATCCGTAAGCGGCAGGGTCGGAACAGGAGAGCGCACGAGGGAGCTTCCAGGGG  
GAAACGCCTGGTATCTTTATAGTCTGTGCGGTTTTCCACCTCTGACTTGAGCGTCGATTTTTGTGATGCT  
CGTCAGGGGGGCGGAGCCTATGGAAAACGCCAGCAACCGGCCTTTTTACGGTTCCTGGCCTTTTGCTG  
GCCTTTTGCTCACATGTTCTTTCCTGCGTTATCCCCTGATTCTGTGGATAACCGTATTACCGCCTTTGAGTG  
AGCTGATACCGCTCGCCGACCCGAACGACCGAGCGCAGCGAGTCAGTGAGCGAGGAAGCGGAAGAGCG  
CCAATACGCAAACCGCCTCTCCCGCGCGTGGCCGATTCATTAATGCAGCTGGCACGACAGTTTTCCC  
GACTGGAAAGCGGGCAGTGAGCGCAACGCAATTAATGTGAGTTAGCTCACTCATTAGGCACCCAGGCTT  
TACACTTTATGCTTCCGGCTCGTATGTTGTGTGGAATTGTGAGCGGATAACAATTTACACAGGAAACAGC  
TATGACCATGATTACGCCAAGCGCGCAATTAACCCTACTAAAGGGAACAAAAGCTGGAGCTGCAAGCTT  
AATGTAGTCTTATGCAATACTCTTGTAGTCTTGCAACATGGTAACGATGAGTTAGCAACATGCCTTACAAG  
GAGAGAAAAAGCACCGTGCATGCCGATTGGTGGAAAGTAAGGTGGTACGATCGTGCCTTATTAGGAAGGC  
AACAGACGGTCTGACATGGATTGGACGAACCACTGAATTGCCGATTGCAGAGATATTGTATTTAAGTG  
CCTAGCTCGATAACAATAAACGGTCTCTCTGTTAGACCAAGATCTGAGCCTGGGAGCTCTCTGGCTAAT  
AGGGAACCCACTGCTTAAGCCTCAATAAAGCTTGCCTTGAGTGTGGAATCTCAAGTAGTGTGTCGGCTGTGT  
GTGACTCTGGTAACTAGAGATCCCTCAGACCCCTTTAGTCACTGTTGGAATCTCTAGCAGTGGCCCCG  
AACAGGGACCTGAAAGCGAAAGGGAACACAGAGCTCTCTGACGACGAGGACTCGGCTTGTGAAAGCGCGC  
ACGGCAAGAGGCGAGGGGCGGCGACTGGTGAGTACGCCAAAAATTTGACTAGCGGAGGCTAGAAGGAG  
AGAGATGGGTGCGAGAGCGTCAGTATTAAGCGGGGAGAATTAGATCGCGATGGGAAAAAATTCGGTTA  
AGGCCAGGGGAAAGAAAAAATAAAATTAACATATAGTATGGGCAAGCAGGGAGCTAGAACGATTC  
GCAGTTAATCCTGGCCTGTTAGAAACATCAGAAGGCTGTAGACAAATACTGGGACAGCTACAACCATCCC  
TTCAGACAGGATCAGAAGAACTTAGATCATTATATAATACAGTAGCAACCCTCTATTGTGTGCATCAAAG  
GATAGAGATAAAAGACACCAAGGAAGCTTTAGACAAGATAGAGGAAGAGCAAAAACAAAAGTAAGACCA  
CCGCACAGCAAGCGGCCGCTGATCTTCAGACCTGGAGGAGGAGATATGAGGGACAATTGGAGAAGTGAA  
TTATATAAATAAAAGTAGTAAAAATTGAACCATTAGGAGTAGCACCCACCAAGGCAAAGAGAAGAGTG  
GTGCAGAGAGAAAAAGAGCAGTGGGAATAGGAGCTTTGTTCTTGGGTCTTGGGAGCAGCAGGAAGC  
ACTATGGGCGCAGCCTCAATGACGCTGACGGTACAGGCCAGACAATTATTGTCTGGTATAGTGCAGCAGC  
AGAACAATTTGCTGAGGGCTATTGAGGCGCAACAGCATCTGTTGCAACTCACAGTCTGGGGCATCAAGCA  
GCTCCAGGCAAGAATCCTGGCTGTGGAAAGATACCTAAAGGATCAACAGCTCCTGGGGATTTGGGGTTGC  
TCTGGAATACTCATTGCAACCACTGCTGTGCCTTGGAAATGCTAGTTGGAGTAATAAATCTCTGGAACAGAT  
TTGGAATCACACGACCTGGATGGAGTGGGACAGAGAAATTAACAATTACACAAGCTTAATACACTCCTTA  
ATTGAAGAATCGCAAAACCAGCAAGAAAAGAAATGAACAAGAATTATTGGAATTAGATAAATGGGCAAGT  
TTGTGGAATTGGTTTAAACATAACAAATTGGCTGTGGTATATAAAATTTATCATAATGATAGTAGGAGGCTT  
GGTAGGTTTAAAGAAATAGTTTTTGTGCTGACTTTCTATAGTGAATAGAGTTAGGCAGGGATATTCACCATTAT  
CGTTTCAGACCCACCTCCCAACCCCGAGGGGACCCGACAGGCCCGAAGGAATAGAAGAAGAAGGTGGAG  
AGAGAGACAGAGACAGATCCATTCGATTAGTGAACGGATCTCGACGGTATCGGTTAACTTTTTAAAAGAAA  
AGGGGGGATTGGGGGTACAGTGCAGGGGAAAGAATAGTAGACATAATAGCAACAGACATACAAACTA  
AAGAATTACAAAAACAAATTACAAAAATTCAAATTTTATCGATCACGAGACTAGCCTC

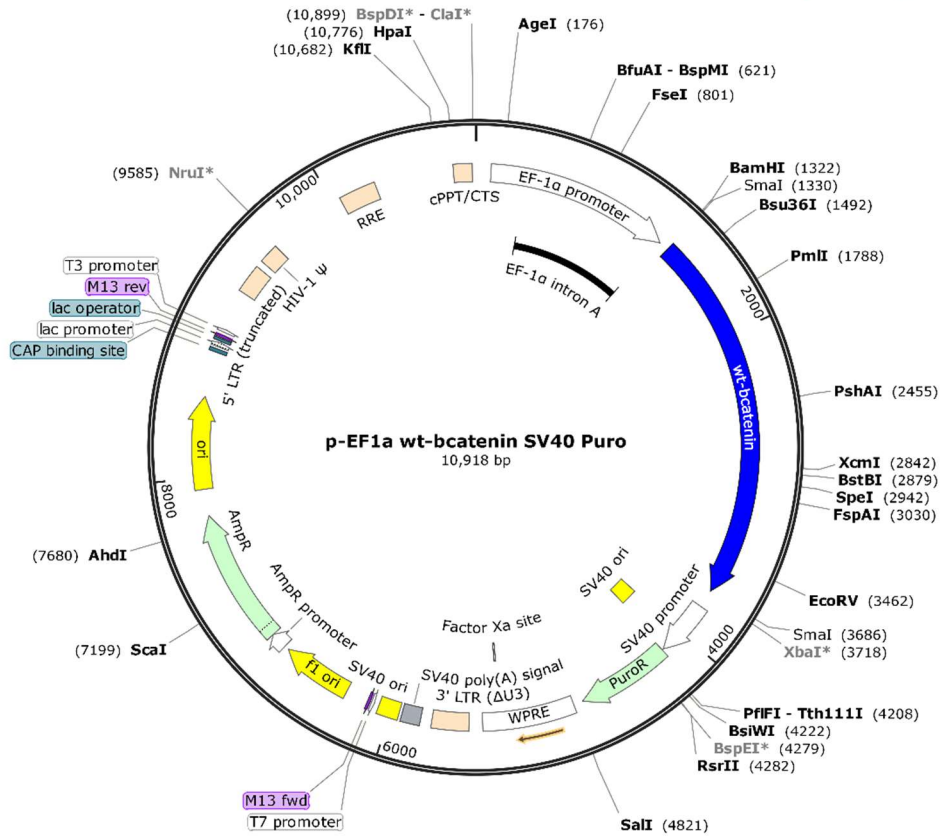

**>pL-EF1a wt-βcatenin SV40 Puro**

CTAGCCCCGATAAGCTTTGCAAAGATGGATAAAGTTTTAAACAGAGAGGAATCTTTGCAGCTAATGGACC  
 TTCTAGGTCTTGAAAGGAGTGGGAATTGGCTCCGGTGCCCGTCAGTGGGCAGAGCGCACATCGCCACAG  
 TCCCCGAGAAGTTGGGGGGAGGGGTTCGGCAATTGAACCGGTGCCTAGAGAAGGTGGCGCGGGGTAAACT  
 GGGAAAGTGATGTCGTGTACTGGCTCCGCCTTTTTCCCGAGGGTGGGGGAGAACCCTATATAAGTGCAGT  
 AGTCGCCGTGAACGTTCTTTTTCGCAACGGGTTTGCCGCCAGAACACAGGTAAGTGCCGTGTGTGGTTCCC  
 GCGGGCCTGGCCTCTTACGGGTTATGGCCCTTGCCTGCTTGAATTACTTCCACTGGCTGCAGTACGTGA  
 TTCTTGATCCCGAGCTTCGGGTTGGAAGTGGGTGGGAGAGTTCGAGGCCTTGCCTTAAGGAGCCCCTTC  
 GCCTCGTGCTTGAGTTGAGGCCTGGCCTGGGCGCTGGGGCCGCGCGTGCGAATCTGGTGGCACCTTTCCG  
 CCTGCTCGTCTGCTTTCGATAAGTCTTACGCCATTTAAAAATTTTTGATGACCTGCTGCGACGCTTTTTTC  
 TGGCAAGATAGTCTTGTAATGCGGGCCAAGATCTGCACACTGGTATTTTCGGTTTTTGGGGCCGCGGGCG  
 GCGACGGGGCCCGTGCCTCCAGCGCACATGTTTCGGCGAGGCGGGGCTGCGAGCGCGGCCACCGAGAA  
 TCGGACGGGGGTAGTCTCAAGCTGGCCGGCCTGCTCTGGTGCCTGGCCTCGCGCCCGCGTGTATCGCCCC  
 GCCCTGGGCGGCAAGGCTGGCCCCGTCGGCACCAGTTGCGTGAGCGGAAAGATGGCCGCTTCCCGGCCCT  
 GCTGCAGGGAGCTCAAAATGGAGGACGCGGCGCTCGGGAGAGCGGGCGGGTGAGTACCCACACAAAG  
 GAAAAGGGCCTTCCGTCCTCAGCCGTCGCTTCATGTGACTCCACGGAGTACCGGGCGCCGTCAGGCAC  
 CTCGATTAGTTCTCGAGCTTTTGGAGTACGTCGCTTTAGGTTGGGGGGAGGGGTTTTATGCGATGGAGTT  
 TCCCCACACTGAGTGGGTGGAGACTGAAGTTAGGCCAGCTTGGCACTTGATGTAATTCTCCTTGGAATTTG  
 CCTTTTTGAGTTTGGATCTTGTTTCATTCTCAAGCCTCAGACAGTGGTTCAAAGTTTTTTTTCTTCCATTT  
 AGGTGTCGTGAGGAATTCTGCAGTCGATCGACGGTACCGCGGGCCCTCCGCGGCCGCGGATCCCCCGGGC  
 CACATGGCTACTCAAGCTGACCTGATGGAGTTGGACATGGCCATGGAGCCGGACAGAAAAGCTGCTGTCA  
 GCCACTGGCAGCAGCAGTCTTACTTGGATTCTGGAATCCATTCTGGTGCCACCACCACAGCTCCTTCCCTG  
 AGTGCCAAGGGCAACCCTGAGGAAGAAGATGTTGACACCTCCCAAGTCTTTATGAATGGGAGCAAGGC  
 TTTTCCAGTCTTACGCAAGAGCAAGTAGCTGATATTGACGGGCAGTATGCAATGACTAGGGCTCAGA  
 GGGTCCGAGCTGCCATGTTCCCTGAGACGCTAGATGAGGGCATGCAGATCCCATCCACGCAGTTTGACGC  
 TGCTCATCCCCTAATGTCCAGCGCTTGGCTGAACCATCACAGATGTTGAAACATGCAGTTGTCAATTTGA  
 TTAATATCAGGATGACGCGGAACCTTGCCACACGTGCAATTCCTGAGCTGACAAAACGCTAAACGATGA  
 GGACCAGGTGGTAGTTAATAAAGCTGCTGTTATGGTCCATCAGCTTTCCAAAAGGAAGCTTCCAGACAT  
 GCCATCATGCGCTCCCCTCAGATGGTGTCTGCCATTGTACGCACCATGCAGAATACAAATGATGTAGAGA  
 CAGCTCGTTGACTGCTGGGACTCTGCACAACCTTTCTCACCACCGCGAGGGCTTGTGGCCATCTTTAAG  
 TCTGGTGGCATCCCAGCGCTGGTGAAAATGCTTGGGTACCAGTGGATTCTGTACTGTTCTACGCCATCAC  
 GACTGCATAATCTCTGCTCCATCAGGAAGGAGCTAAAATGGCAGTGCGCCTAGCTGGTGGACTGCAG  
 AAAATGGTTGCTTTGCTCAACAAAACAAACGTGAAATTTGGCTATTACAACAGACTGCCTCAGATCTT

AGCTTATGGCAATCAAGAGAGCAAGCTCATCATTCTGGCCAGTGGTGGACCCCAAGCCTTAGTAAACATA  
ATGAGGACCTACACTTATGAGAAGCTTCTGTGGACCACAAGCAGAGTGCTGAAGGTGCTGTCTGTCTGCT  
CTAGCAACAAGCCGGCCATTGTAGAAGCTGGTGGGATGCAGGCACTGGGGCTTCATCTGACAGACCCAA  
GTCAGCGACTTGTTCAAACCTGTCTTTGGACTCTCAGAAACCTTTCAGATGCAGCGACTAAGCAGGAAGG  
GATGGAAGGCCCTCCTTGGGACTCTAGTGCAGCTTCTGGGTTCCGATGATATAAATGTGGTCACCTGTGCA  
GCTGGAATTCTCTCTAACCTCACTTGCAATAATTACAAAAACAAGATGATGGTGTGCCAAGTGGGTGGCA  
TAGAGGCTCTTGTACGCACCGTCCTTCGTGCTGGTGACAGGGAAGACATCACTGAGCCTGCCATCTGTGCT  
CTTCGTCACTGACCAGCCGGCATCAGGAAGCCGAGATGGCCAGAATGCCGTTCCGCTTCATTATGGAC  
TGCCTGTTGTGGTTAAACTCCTGCACCCACCATCCCCTGGCCTCTGATAAAGGCAACTGTTGGATTGATT  
CGAAACCTTGCCCTTTGCCAGCAAATCATGCGCCTTTGCGGGAACAGGGTGCTATTCCACGACTAGTTCA  
GCTGCTTGTACGAGCAGATCAGGACACCCAAACGGCGCACCTCCATGGGTGGAACGCAGCAGCAGTTTGTG  
GAGGGCGTGCGCATGGAGGAGATAGTAGAAGGGTGTACTGGAGCTCTCCACATCCTTGCTCGGGACGTTT  
ACAACCGGATTGTAATCCGAGGACTCAATAACCATTTCCATTGTTTGTGCAGTTGCTTTATTCTCCATTGAA  
AATATCCAAAGAGTAGCTGCAGGGGTCTCTGTGAACTTGCTCAGGACAAGGAGGCTGCAGAGGCCATTG  
AAGCTGAGGGAGCCACAGCTCCCCTGACAGAGTTACTCCACTCCAGGAATGAAGGCGTGGCAACATACG  
CAGCTGCTGTCCTATTCCGAATGTCTGAGGACAAGCCACAGGATTACAAGAAGCGGCTTTCAGTCGAGCT  
GACCAGTTCCCTCTTCAGGACAGAGCCAATGGCTTGGAAATGAGACTGCAGATCTTGGACTGGACATTGGT  
GCCAGGGAGAAGCCCTTGGATATCGCCAGGATGATCCCAGCTACCGTTCCTTTCACTCTGGTGGATACG  
GCCAGGATGCCTTGGGGATGGACCCTATGATGGAGCATGAGATGGGTGGCCACCACCCTGGTGTGACTA  
TCCAGTTGATGGGCTGCCTGATCTGGGACACGCCAGGACCTCATGGATGGGCTGCCCCCAGGTGATAGC  
AATCAGCTGGCCTGTTTTGATACTGACCTGTAACCCGGGGAATTCCTCGAGAAGCTGGGGCTCGAGATCT  
AGAGTCGAGAAGCTTGATGATCTGCGCAGCACCATGGCCTGAAATAACCTCTGAAAGAGGAACTTGGTTA  
GGTACCTTCTGAGGCGAAAGAACCAGCTGTGGAATGTGTGTCAGTTAGGGTGTGGAAAGTCCCCAGGCT  
CCCCAGCAGGCAGAAGTATGCAAAGCATGCATCTCAATTAGTCAGCAACCAGGTGTGGAAAGTCCCCAG  
GCTCCCCAGCAGGCAGAAGTATGCAAAGCATGCATCTCAATTAGTCAGCAACCATAAGTCCCGCCCTAAC  
TCCGCCCATCCCCGCCCTAACTCCGCCAGTTCGCCCCATTCTCCGCCCATGGCTGACTAATTTTTTTTAT  
TTATGCAGAGGCCGAGGCCGCTCGGCCTCTGAGCTATTCCAGAAGTAGTGAGGAGGCTTTTTTGGAGGC  
CTAGGCTTTTTGCAAAAAGCTTACCATGACCGAGTACAAGCCACGGTGCCTCGCCACCCGCGACGACG  
TCCCCAGGGCCGTACGCACCCCTCGCCGCCGCGTTCCGCCACTACCCCGCCACGCGCCACACCGTTCGATCC  
GGACCGCCACATCGAGCGGGTCAACGAGCTGCAAGAACTCTTCTCACGCGGTCGGGCTCGACATCGGC  
AAGGTGTGGGTCGCGGACGACGGCGCCGCGGTGGCGGTCTGGACACGCCGGAGAGCGTGAAGCGGGG  
GCGGTGTTCCCGAGATCGGCCCGCGCATGGCCGAGTTGAGCGGTTCCCGGCTGGCCGCGCAGCAACAGA  
TGAAAGGCCTCCTGGCGCCGACCCGGCCAAAGGAGCCCGCGTGGTTCTGGCCACCCTCGGCCTCTGCC  
CGACCACCAGGGCAAGGGTCTGGGACGCGCCGCTGTCTCCCCGGAGTGGAGGCGGCGCCGAGCGCGCCG  
GGTCCCGCCTTCTGGAGACTCCGCGCCCGAACCTCCCCTTCTACGAGCGGCTCGGCTTACCGTCA  
CCGCCAGCTCGAGTGCCCGAAGGACCGCGACCTGGTGTGATGCCCGCAAGCCCGGTGCCTACGCGCC  
GCCCCACGACCCGAGCGCCCGACCGAAAGGAGCGCACGACCCCATGCCAGTCGACAATCAACCTCTGG  
ATTACAAAATTTGTGAAAGATTGACTGGTATTCTTAACTATGTTGCTCCTTTTACGCTATGTGGATACGCT  
GCTTTAATGCCTTTGTATCATGCTATTGCTTCCCGTATGGCTTTCATTTTCTCCTCCTTGTATAAATCCTGGT  
TGCTGTCTCTTATGAGGAGTTGTGGCCCGTTGTCAGGCAACGTGGCGTGGTGTGCACTGTGTTTGTGAC  
GCAACCCCACTGGTTGGGGCATTGCCACCACCTGTCAGCTCCTTCCGGGACTTTCGCTTTCCCCCTCCCT  
ATTGCCACGGCGGAACTCATCGCCGCTGCCTTGCCCGCTGCTGGACAGGGGCTCGGCTGTTGGGCACTG  
ACAATTCCGTGGTGTGTGCGGGGAAGCTGACGTCCTTTCCATGGCTGCTCGCCTGTGTTGCCACCTGGATT  
CTGCGCGGGACGTCCTTCTGCTACGTCCTTTCGGCCCTCAATCCAGCGGACCTTCTTCCCGCGGCCTGCT  
GCCGGCTCTGCGGCCTTTCGCGTCTTCGCCTTCGCCCTCAGACGAGTCGGATCTCCCTTTGGGCCGCT  
CCCCGCTTGAATTCGAGCTCGGTACCTTTAAGACCAATGACTTACAAGGCAGCTGTAGATCTTAGCCAC  
TTTTTAAAAGAAAAGGGGGGACTGGAAGGGCTAATCACTCCAACGAAGACAAGATCTGCTTTTTGCTT  
GTACTGGGTCTCTCTGGTTAGACCAGATCTGAGCCTGGGAGCTCTCTGGCTAACTAGGGAACCCACTGCTT  
AAGCCTCAATAAAGCTTGCTTGAGTGCTTCAAGTAGTGTGTGCCCGTCTGTTGTGTGACTCTGGTAACTA  
GAGATCCCTCAGACCCTTTTAGTCAGTGTGGAATACTCTAGCAGTAGTAGTTCATGTCATCTTATTATTC  
AGTATTTATAACTTGCAAAGAAATGAATATCAGAGAGTGAGAGGAACTTGTATTGTCAGCTTATAATGG  
TTACAAATAAAGCAATAGCATCAAAATTTACAAATAAAGCATTTTTTTCACTGCATTCTAGTTGTGGTT  
TGTCCAAACTCATCAATGTATCTTATCATGTCTGGCTCTAGCTATCCCGCCCCTAACTCCGCCAGTTCGGC  
CCATTCTCCGCCCATGGCTGACTAATTTTTTTTATTTATGCAAGGGCCGAGGCCGCTCGGCCTCTGAGC  
TATTCCAGAAGTAGTGAGGAGGCTTTTTTGGAGGCCTAGGCTTTTTCGCTCGAGACGTACCCAATTCGCCCT  
ATAGTGAGTCGATTACGCGCGCTCACTGGCCGTCGTTTTACAACGTCGTGACTGGGAAAACCTGGCGTT  
ACCAACTTAATCGCCTTTCAGCACATCCCCCTTTCGCCAGCTGGCGTAATAGCGAAGAGGCCCGCACCG  
ATCGCCCTTCCCAACAGTTGCGCAGCCTGAATGGCGAATGGCGCAGCGCCCTGTAGCGGCGCATTAAG  
CGCGGCGGGTGTGGTGTACGCGCAGCGTACCCGCTACACTTGCAGCGCCCTAGCGCCGCTCCTTTTC  
GCTTTCTTCCCTTCTTTCTCGCCACGTTTCGCCGGCTTTCCCCGTCAGCTCTAAATCGGGGGCTCCCTTA  
GGGTTCCGATTTAGTGCTTTACGGCACCTCGACCCCAAAAAAATTGATTAGGGTGATGGTTCACGTAGTG  
GGCCATCGCCCTGATAGACGGTTTTTTCGCCCTTTCAGCTTGGAGTCCACGTTCTTTAATAGTGGACTCTTG



TTCCAAACTGGAACAACACTCAACCCTATCTCGGTCTATTCTTTTGATTATAAAGGGATTTTGCCGATTTTCG  
GCCTATTGGTTAAAAAATGAGCTGATTTAACAAAAATTTAACGCGAATTTTAACAAAATATTAACGTTTA  
CAATTTCCAGGTGGCACTTTTCGGGGAAATGTGCGCGGAACCCCTATTTGTTATTTTTCTAAATACATT  
CAAATATGTATCCGCTCATGAGACAATAACCCTGATAAATGCTTCAATAATATTGAAAAAGGAAGAGTAT  
GAGTATTCAACATTTCCGTGTGCCCCTTATCCCTTTTTGCGGCATTTTGCCCTTCTGTTTTGCTCACCCA  
GAAACGCTGGTGAAGTAAAAGATGCTGAAGATCAGTTGGGTGCACGAGTGGGTACATCGAACTGGAT  
CTCAACAGCGGTAAAGATCCTTGAGAGTTTTCGCCCCGAAGAACGTTTTCCAATGATGAGCACTTTTAAAGT  
TCTGCTATGTGGCGCGGTATTATCCCGTATTGACGCCGGGCAAGAGCAACTCGGTGCGCCGATACACTATT  
CTCAGAATGACTTGGTTGAGTACTACCAGTCACAGAAAAGCATCTTACGGATGGCATGACAGTAAGAGA  
ATTATGCAGTGTGCCATAACCATGAGTGATAAACTGCGGCCAACTTACTTCTGACAACGATCGGAGGA  
CCGAAGGAGCTAACCGCTTTTTGCACAACATGGGGGATCATGTAACCTCGCCTTGATCGTTGGGAACCGG  
AGCTGAATGAAGCCATACCAAACGACGAGCGTGACACCAGATGCCTGTAGCAATGGCAACAACCGTTGC  
GCAAACATTAAGCTGGCGAACTACTTACTTAGCTTCCCGGCAACAATTAATAGACTGGATGGAGGCGGA  
TAAAGTTGCAGGACCACTTCTGCGCTCGGCCCTTCCGGCTGGCTGGTTTATTGCTGATAAATCTGGAGCCG  
GTGAGCGTGGGTCTCGCGGTATCATTGCAGCACTGGGGCCAGATGGTAAGCCCTCCCGTATCGTAGTTAT  
CTACACGACGGGAGTCAGGCAACTATGGATGAACGAAATAGACAGATCGCTGAGATAGGTGCCTCACT  
GATTAAGCATTGGTAACTGTCAGACCAAGTTTACTCATATATACTTTAGATTGATTTAAACTTCATTTTT  
AATTTAAAAGGATCTAGGTGAAGATCCTTTTTGATAATCTCATGACCAAAATCCCTTAACGTGAGTTTTCG  
TTCCACTGAGCGTCAGACCCCGTAGAAAAGATCAAAGGATCTTCTTGAGATCCTTTTTTTCTGCGCGTAAT  
CTGCTGCTTGCAAACAAAAAAACCACCGCTACCAGCGGTGGTTTGTGTTGCCGGATCAAGAGCTACCAACT  
CTTTTTCCGAAGGTAAGTGGCTTACGACAGAGCGCAGATACCAAATACTGTCCTTCTAGTGTAGCCGTAGTT  
AGGCCACCACTTCAAGAACTCTGTAGCACCGCCTACATACCTCGCTCTGTAATCCTGTTACCAGTGGCTG  
CTGCCAGTGGCGATAAGTCGTGTCTTACCGGGTTGACTCAAGACGATAGTTACCGGATAAGGCGCAGCG  
GTCGGGCTGAACGGGGGGTTCGTGCACACAGCCAGCTTGGAGCGAACGACCTACACCGAACTGAGATA  
CCTACAGCGTGAGCTATGAGAAAGCGCCACGCTTCCCGAAGGGAGAAAGGCGGACAGGTATCCGGTAAG  
CGGCAGGGTCGGAACAGGAGAGCGCACGAGGGAGCTTCCAGGGGAAACGCCTGGTATCTTTATAGTCC  
TGTCGGGTTTTCGCCACCTCTGACTTGAGCGTCGATTTTTGTGATGCTCGTCAGGGGGGGCGGAGCCTATGGA  
AAAACGCCAGCAACGCGGCCTTTTTACGGTTCTGGCCTTTTGCTGGCCTTTTGCTCACATGTTCTTTCCTG  
CGTTATCCCTGATTCTGTGGATAACCGTATTACCGCCTTTGAGTGAGCTGATACCGCTCGCCGACGCCGA  
ACGACCGAGCGCAGCGAGTCAGTGAGCGAGGAAGCGGAAGAGCGCCCAATACGCAAAACCGCCTCTCCCC  
GCGCGTTGGCCGATTCATTAATGCAGCTGGCACGACAGGTTTCCCGACTGGAAGCGGGCAGTGAGCGCA  
ACGCAATTAATGTGAGTTAGCTCACTCATTAGGCACCCCAAGGCTTTACACTTTATGCTTCCGGCTCGTATG  
TTGTGTGGAATTGTGAGCGGATAACAATTTACACAGGAAACAGCTATGACCATGATTACGCCAAGCGCG  
CAATTAACCTCACTAAAGGGAACAAAAGCTGGAGTGCAAAGCTTAATGTAGTCTTATGCAATACTCTTG  
TAGTCTTGCAACATGGTAACGATGAGTTAGCAACATGCCTTACAAGGAGAGAAAAAGCACCCTGATGCC  
GATTTGGTGAAGTAAGTGGTACGATCGTGCCTTATTAGGAAGGCAACAGACGGGTCTGACATGGATTGG  
ACGAACCACTGAATTGCCGCAATTGCAGAGATATTGATTTAAGTGCCTAGCTCGATACAATAACGGGTC  
TCTCTGTTAGACCAGATCTGAGCCTGGGAGCTCTCTGGCTAACTAGGGAACCCACTGCTTAAAGCCTCAAT  
AAAGCTTGCCTTGAGTGCTTCAAGTAGTGTGTGCCCGTCTGTTGTGTGACTCTGGTAACTAGAGATCCCTC  
AGACCTTTTTAGTCAGTGTGAAAATCTCTAGCAGTGGCGCCCGAACAGGGACCTGAAAGCGAAAAGGGA  
AACCAGAGCTCTCTCGACGCAGGACTCGGCTTGCTGAAGCGCGCACGGCAAGAGGGCAGGGGCGGCGAC  
TGGTGAGTACGCCAAAAATTTGACTAGCGGAGGCTAGAAGGAGAGAGATGGGTGCGAGAGCGTCAGTA  
TTAAGCGGGGGAGAATTAGATCGCGATGGGAAAAAATTCGGTTAAGGCCAGGGGGAAAGAAAAAATATA  
AATTAACATATAGTATGGGCAAGCAGGGAGCTAGAACGATTTCGAGTTAATCCTGGCCTGTTAGAAC  
ATCAGAAGGCTGTAGACAAATACTGGGACAGCTACAACCATCCCTTCAGACAGGATCAGAAGAACTTAG  
ATCATTATATAATACAGTAGCAACCCTCTATTGTGTGCATCAAAGGATAGAGATAAAAGACACCAAGGAA  
GCTTTAGACAAGATAGAGGAAGAGCAAAAACAAAAGTAAGACCACCGCACAGCAAGCGGCCGCTGATCTT  
CAGACCTGGAGGAGGAGATATGAGGGACAATTGGAGAAGTGAATTATATAAATATAAAGTAGTAAAAT  
TGAACCATTAGGAGTAGCACCCACCAAGGCAAAGAGAAGAGTGGTGCAGAGAGAAAAAAGAGCAGTGG  
GAATAGGAGCTTTGTTCCCTTGGGTTCTTGGGAGCAGCAGGAAGCACTATGGGCGCAGCCTCAATGACGCT  
GACGGTACAGGCCAGACAATTATTGCTGGTATAGTGCAGCAGCAGAACAAATTTGCTGAGGGCTATTGAG  
GCGCAACAGCATCTGTTGCAACTCACAGTCTGGGGCATCAAGCAGCTCCAGGCAAGAATCCTGGCTGTGG  
AAAGATACCTAAAGGATCAACAGCTCCTGGGGATTTGGGGTTGCTCTGGAAACTCATTTGCACCACTGC  
TGTGCCTTGGAAATGCTAGTTGGAGTAATAAATCTCTGGAACAGATTTGGAATCACACGACCTGGATGGAG  
TGGGACAGAGAAATTAACAATTACACAAGCTTAATACACTCCTTAATTGAAGAATCGCAAAAACAGCAA  
GAAAAGAATGAACAAGAATTATTGGAATTAGATAAATGGGCAAGTTTGTGGAATTGGTTTAAACATAACA  
AATTGGCTGTGGTATATAAAATATTTCATAATGATAGTAGGAGGCTTGGTAGGTTTAAAGAATAGTTTTGC  
TGACTTTCTATAGTGAATAGAGTTAGGCAGGATATTCACCATATCGTTTTAGACCCACCTCCCAACCC  
CGAGGGACCCGACAGGCCCGAAGGAATAGAAGAAGAAGGTGGAGAGAGACAGACAGACAGATCCATT  
CGATTAGTGAACGGATCTCGACGGTATCGGTTAACTTTTTAAAGAAAAGGGGGATTGGGGGTACAGT  
GCAGGGGAAAGAATAGTAGACATAATAGCAACAGACATACAACTAAAGAATTACAAAAACAAATTACA  
AAAATTCAAAATTTTATCGATCACGAGACTAGCCTC

### Generation of *Ctnnb1* KO cells

CRISPR/Cas9 was used to induce small in-dels, microdeletions or complete deletion of the *Ctnnb1* locus using single sgRNA or pairwise combinations. Briefly for each experiment  $5 \times 10^6$  mESCs (E14Tg2a from ATCC) per well were seeded onto gelatin-coated mw6 plates. 24 hours after seeding, 2 ml of fresh mESCs medium were provided at least 30 minutes before transfection. Transfection mix consisted of 5  $\mu$ g of all-in-one vectors expressing Cas9 and previously subcloned sgRNA (px459-spCas9-Puro), 100  $\mu$ l Optimem (Thermo-Fisher) and 20  $\mu$ l Polyfectamine reagent (Qiagen). For co-transfection of two sgRNAs, 2.5  $\mu$ g of each vector were used. Transfection mix was incubated 15 minutes at room temperature and then directly added to seeded mESCs. Fresh mESC medium was added to a final volume of 2,7 ml and 24 hours after, medium was replaced. 48 hours after transfection puromycin selection (5  $\mu$ g/ml) was applied for additional 48 hours. Cells were then analysed at population level to assess the knock-out efficiency. For the establishment of  $\beta$ -catenin KO cell lines, transfected pools were replated at clonal density and single cell clones were manually picked and screened for homozygous *Ctnnb1* deletion. For PCR assay of *Ctnnb1*, two or three oligonucleotides were used depending on the deletion strategy. Knock-out and screening strategies together with oligos for genotyping edited cells are summarised in **Table S6**.

### Cell cycle and proliferation analysis

For cell cycle analysis, cells were seeded in equal number ( $1 \times 10^6$  cells) on gelatin coated 10 cm dishes. 3 days after plating cells were trypsinised and collected with complete medium by centrifugation at 300xg for 5 minutes. Cell pellet was washed with PBS twice and centrifuged again for 5 minutes at 300xg. The pellet was then resuspended in cold 70% Ethanol while vortexing and incubated overnight at 4C. The next day cells were stained with propidium iodide after RNaseI treatment using the Propidium Iodide Flow Cytometry Kit (Abcam ab139418) following manufacturer's instructions. DNA content was measured on a BD Fortessa cytometer. Finally, FCS files were processed in FlowJo using the built-in cell-cycle analysis plug-in.

For growth curve analysis  $7 \times 10^3$  mESCs per well were plated in triplicates in 96-well plates. For cell counts by FACS each day, for the following 96 hours, cells were detached, diluted in DAPI containing medium to stain dead cells and transferred into mw96 U-bottom plates (Falcon) and counted using FACS-canto. Exponential growth curves and population doubling time were calculated as previously described (De Jaime-Soguero et al., 2017).

### Lentivirus production

For mESCs transduction, lentiviral particles were produced following the RNA interference Consortium (TRC) instructions for lentiviral particle production and infection in 6-well plates (<http://www.broadinstitute.org/rnai/public/>). Briefly,  $5 \times 10^5$  HEK293T cells/well were seeded in 6-well plates. The day after plating, the cells were co-transfected with 1  $\mu$ g of lentiviral vector, 750  $\mu$ g pCMV-dR8.9, and 250  $\mu$ g pCMV-VSV-G, using Polyfect reagent (Qiagen). The day after transfection, the HEK293T culture medium was substituted with the ESC culture medium. Then  $5 \times 10^5$  ESCs/well were plated onto gelatin-coated 6-well plates the day before transduction. The lentiviral particles containing medium was harvested from HEK293T cells at 48, 72 and 96 hrs after transfection, filtered, and added to the ESC plates. The day after transduction, these ESCs were washed twice in PBS and hygromycin selection or puromycin selection were applied.

### Supplemental references

Aulicino, F., Theka, I., Ombrato, L., Lluís, F., and Cosma, M.P. (2014). Temporal perturbation of the Wnt signaling pathway in the control of cell reprogramming is modulated by TCF1. *Stem Cell Reports* 2, 707-720.

De Jaime-Soguero, A., Aulicino, F., Ertaylan, G., Griego, A., Cerrato, A., Tallam, A., Del Sol, A., Cosma, M.P., and Lluís, F. (2017). Wnt/Tcf1 pathway restricts embryonic stem cell cycle through activation of the *Ink4/Arf* locus. *PLoS Genet* 13, e1006682.

Fuerer, C., and Nusse, R. (2010). Lentiviral Vectors to Probe and Manipulate the Wnt Signaling Pathway. *PLOS ONE* 5, e9370.

Lyashenko, N., Winter, M., Migliorini, D., Biechele, T., Moon, R.T., and Hartmann, C. (2011). Differential requirement for the dual functions of beta-catenin in embryonic stem cell self-renewal and germ layer formation. *Nature cell biology* 13, 753-761.

Ran, F.A., Hsu, P.D., Wright, J., Agarwala, V., Scott, D.A., and Zhang, F. (2013). Genome engineering using the CRISPR-Cas9 system. *Nature protocols* *8*, 2281-2308.

Wray, J., Kalkan, T., Gomez-Lopez, S., Eckardt, D., Cook, A., Kemler, R., and Smith, A. (2011). Inhibition of glycogen synthase kinase-3 alleviates Tcf3 repression of the pluripotency network and increases embryonic stem cell resistance to differentiation. *Nature cell biology* *13*, 838-845.
