# Supplementary material for: Canonical Wnt Pathway Controls mESC Self-Renewal Through Inhibition of Spontaneous Differentiation via β-Catenin/TCF/LEF Functions
Source: PubMed Central journal article supplement — Stem Cell Reports. 2020 Aug 20;15(3):646–61. doi: 10.1016/j.stemcr.2020.07.019 (PMC7486219; doi:10.1016/j.stemcr.2020.07.019), 2020-08-20
Supplement: mmc8.pdf [file mmc8.pdf]

# Canonical Wnt Pathway Controls mESC Self-Renewal Through Inhibition of Spontaneous Differentiation via $\beta$ -Catenin/TCF/LEF Functions

Francesco Aulicino,<sup>1,3</sup> Elisa Pedone,<sup>1,2,4,10</sup> Francesco Sottile,<sup>1,10</sup> Frederic Lluís,<sup>5</sup> Lucia Marucci,<sup>2,4</sup> and Maria Pia Cosma<sup>1,6,7,8,9,\*</sup>

<sup>1</sup>Centre for Genomic Regulation (CRG), Dr Aiguader 88, 08003, Barcelona, Spain

<sup>2</sup>School of Cellular and Molecular Medicine, University of Bristol, Bristol BS8 1TD, UK

<sup>3</sup>Department of Biochemistry, University of Bristol, Bristol BS8 1TD, UK

<sup>4</sup>Department of Engineering Mathematics, University of Bristol, Bristol BS8 1UB, UK

<sup>5</sup>Department of Development and Regeneration, Stem Cell Institute, KU Leuven, 300 Leuven, Belgium

<sup>6</sup>Universitat Pompeu Fabra (UPF), Barcelona, Spain

<sup>7</sup>ICREA, Pg. Lluís Companys 23, Barcelona 08010, Spain

<sup>8</sup>Guangzhou Regenerative Medicine and Health Guangdong Laboratory (GRMH-GDL), Guangzhou 510005, China

<sup>9</sup>Key Laboratory of Regenerative Biology and Guangdong Provincial Key Laboratory of Stem Cells and Regenerative Medicine, Guangzhou Institutes of Biomedicine and Health, Chinese Academy of Science, Guangzhou 510530, China

<sup>10</sup>Co-second author

\*Correspondence: [pia.cosma@crgeu](mailto:pia.cosma@crgeu)

<https://doi.org/10.1016/j.stemcr.2020.07.019>

## SUMMARY

The Wnt/ $\beta$ -catenin signaling pathway is a key regulator of embryonic stem cell (ESC) self-renewal and differentiation. Constitutive activation of this pathway has been shown to increase mouse ESC (mESC) self-renewal and pluripotency gene expression. In this study, we generated a novel  $\beta$ -catenin knockout model in mESCs to delete putatively functional N-terminally truncated isoforms observed in previous knockout models. We showed that aberrant N-terminally truncated isoforms are not functional in mESCs. In the generated knockout line, we observed that canonical Wnt signaling is not active, as  $\beta$ -catenin ablation does not alter mESC transcriptional profile in serum/LIF culture conditions. In addition, we observed that Wnt signaling activation represses mESC spontaneous differentiation in a  $\beta$ -catenin-dependent manner. Finally,  $\beta$ -catenin ( $\Delta$ C) isoforms can rescue  $\beta$ -catenin knockout self-renewal defects in mESCs cultured in serum-free medium and, albeit transcriptionally silent, cooperate with TCF1 and LEF1 to inhibit mESC spontaneous differentiation in a GSK3-dependent manner.

## INTRODUCTION

$\beta$ -Catenin regulates different cellular processes spanning from development to cancer progression. In addition to its central role in adherens junctions,  $\beta$ -catenin is the key effector of the canonical Wnt signaling pathway. Exposure to canonical Wnt ligands, such as WNT3A or small-molecule inhibitors of GSK3 activity, triggers  $\beta$ -catenin stabilization and its nuclear translocation. In the nucleus,  $\beta$ -catenin acts as a scaffolding protein for transcriptional co-factors such as TCF/LEF family members, thereby activating the expression of Wnt target genes. Over the past years, accumulating evidence highlighted a key role for Wnt/ $\beta$ -catenin signaling in sustaining self-renewal, pluripotency, and cell-cycle progression of mouse embryonic stem cells (mESCs) (De Jaime-Soguero et al., 2017; Sato et al., 2004; Ten Berge et al., 2011) and in regulating somatic cell reprogramming (Aulicino et al., 2014; Lluís et al., 2008, 2011; Marucci et al., 2014). Despite its importance in mESC physiology,  $\beta$ -catenin knockout mESC lines developed so far show no defects in self-renewal or pluripotency marker expression when cultured in a medium containing serum plus the leukemia inhibitory factor (LIF), but display a strict LIF requirement for pluripotency maintenance and fail to efficiently

differentiate *in vitro* (Lyashenko et al., 2011; Wray et al., 2011). Surprisingly, LIF dependency can be rescued by transcriptionally defective  $\beta$ -catenin isoforms ( $\Delta$ C mutants), challenging the hypothesis that  $\beta$ -catenin transcriptional activity could be relevant for mESC pluripotency and self-renewal (Lyashenko et al., 2011; Wray et al., 2011). More recently, however, it has been demonstrated that the most widely used inducible  $\beta$ -catenin knockout alleles lead to the production of uncharacterized N-terminally truncated  $\beta$ -catenin isoforms ( $\Delta$ N  $\beta$ -cat) during pre-implantation embryo development (Messerschmidt et al., 2016).

Here, we confirmed the production of  $\Delta$ N  $\beta$ -cat isoforms in mESCs and generated a novel  $\beta$ -catenin full knockout model in mESCs using CRISPR/Cas9. We found that complete  $\beta$ -catenin deletion produces similar phenotypes observed in the previously described knockout models retaining  $\Delta$ N  $\beta$ -cat fragments, suggesting that N-terminally truncated isoforms are biologically inactive. We further analyzed the impact of  $\beta$ -catenin loss at transcriptional level, in presence or absence of GSK3 chemical inhibition. Our results show that the Wnt/ $\beta$ -catenin pathway is not transcriptionally active in mESCs cultured in serum/LIF. However, upon GSK3 inhibition, we observed  $\beta$ -catenin-dependent inhibition of differentiation markers,

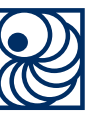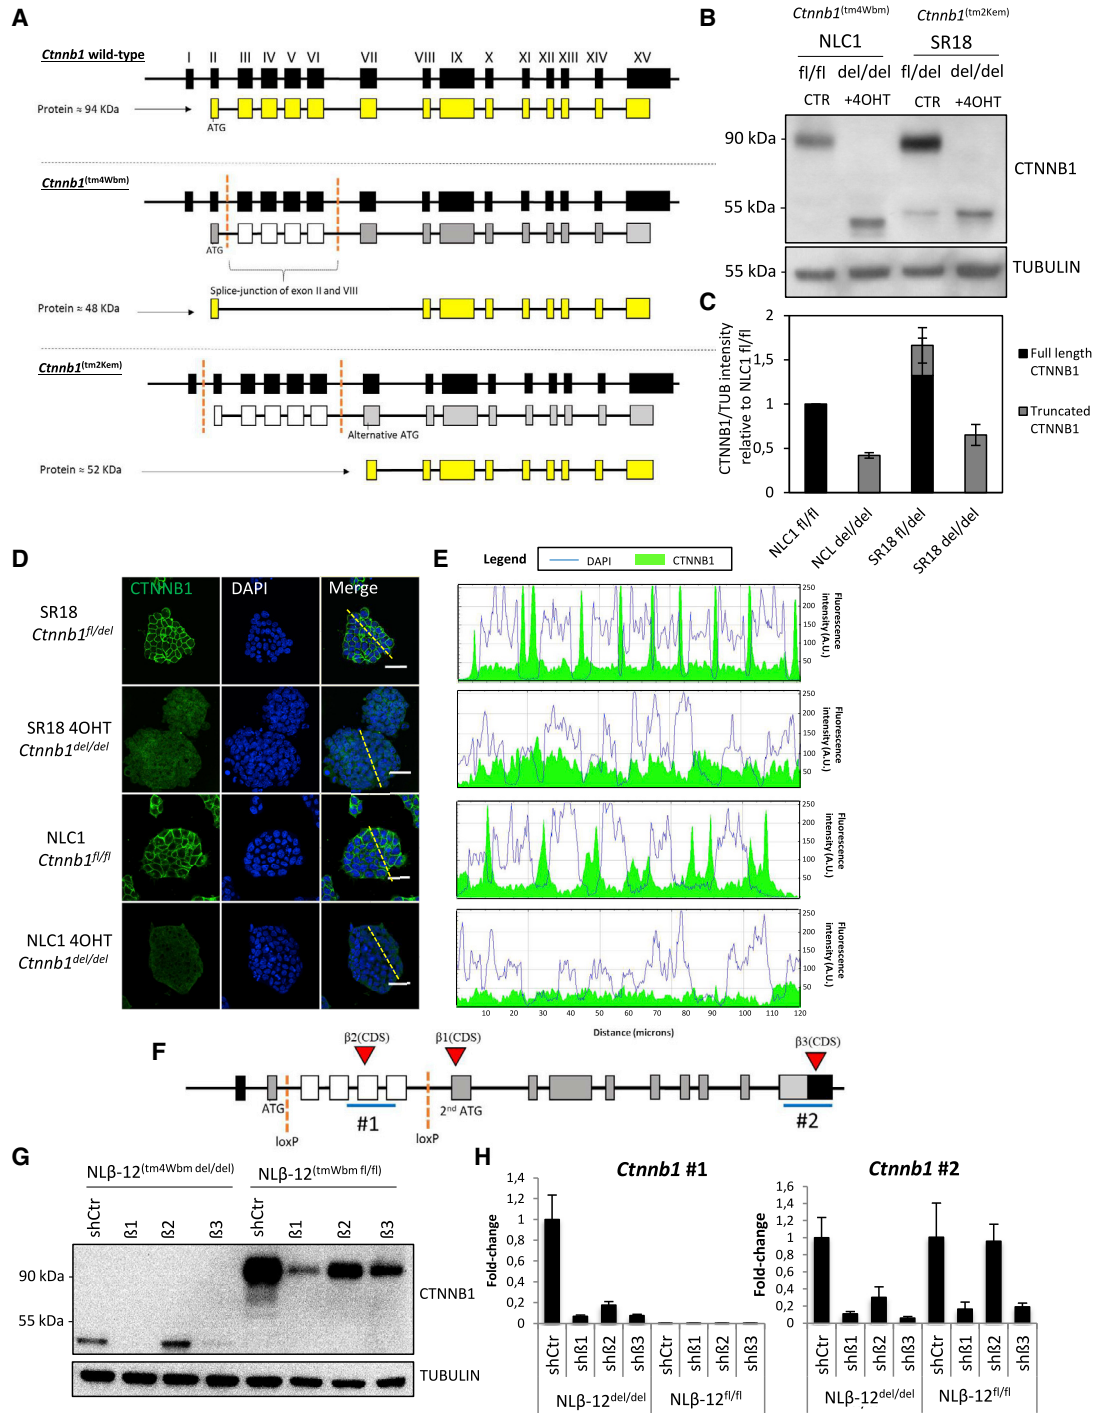

### Figure 1. Inducible $\beta$ -Catenin Knockout Alleles Produce N-Terminally Truncated Isoforms in mESCs

(A) Schematic representation of murine  $\beta$ -catenin (*Ctnnb1*) locus and the two *loxP* alleles used for  $\beta$ -catenin studies in mESCs. Black boxes represent exons, yellow boxes coding exons, dashed red lines indicate *loxP* sites, and white boxes represent exons excised upon CRE-mediated recombination of *loxP* sites.

(B and C) Western blot (B) and relative quantification (C) of NLC1 and SR18 cell lines upon 72-h 4'-hydroxytamoxifen treatment (+4OHT) and respective untreated controls (CTRs). SR18 untreated cell line is heterozygous for full-length  $\beta$ -catenin deletion. Western blot band intensities (C) are normalized on NLC1 full-length CTNNB1.

(legend continued on next page)

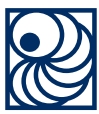

while the expression of pluripotency genes remained unchanged. Finally, we showed that transcriptionally impaired C-terminally truncated  $\beta$ -catenin rescue isoforms ( $\Delta$ C  $\beta$ -cat) can inhibit mESC differentiation in the absence of LIF when GSK3 is inhibited, as their full-length counterpart. However, this phenotype is impaired upon silencing of TCF1/LEF1, suggesting that  $\Delta$ C  $\beta$ -cat isoforms are not entirely transcriptionally silent and their nuclear function could depend on TCF/LEF factors.

## RESULTS

### Inducible $\beta$ -Catenin Knockout Alleles Generate N-Terminally Truncated Isoforms in mESCs

$\beta$ -Catenin (*Ctnnb1*) mRNA includes 15 exons, with an open reading frame (ORF) spanning from exon 2 to exon 15. Previously reported  $\beta$ -catenin knockout models in mESCs were generated using CRE-mediated excision of a DNA fragment flanked by two *LoxP* sites encompassing exons 3–6 (*Ctnnb1*<sup>tm4W<sup>b</sup>bm</sup>) or 2–6 (*Ctnnb1*<sup>tm2K<sup>em</sup></sup>). Three groups have independently studied both alleles in mESCs and concluded that  $\beta$ -catenin is dispensable for mESC self-renewal (Lyashenko et al., 2011; Raggioli et al., 2014; Wray et al., 2011).

A recent study reported that, during pre-implantation embryo development, both these  $\beta$ -catenin knockout alleles are flawed by the production of N-terminally truncated ( $\Delta$ N) proteins, possibly generated by alternative splicing (*Ctnnb1*<sup>tm4W<sup>b</sup>bm</sup>) or by a secondary ATG within a Kozak consensus sequence downstream of the excised region (*Ctnnb1*<sup>tm2K<sup>em</sup></sup>) (Figure 1A) (De Vries et al., 2004; Messerschmidt et al., 2016). Remarkably the production of these  $\Delta$ N  $\beta$ -cat isoforms in mESCs has not been previously reported (Anton et al., 2007; Lyashenko et al., 2011; Wagner et al., 2010; Wray et al., 2011). We therefore tested the expression of  $\Delta$ N  $\beta$ -cat isoforms by using an antibody raised against the C-terminal portion of  $\beta$ -catenin in protein extracts of NLC1 and SR18 mESCs, which harbor the *Ctnnb1*<sup>tm4W<sup>b</sup>bm fl/fl</sup> and *Ctnnb1*<sup>tm2K<sup>em</sup> fl/del</sup> alleles, respectively, and stably express the CRE-ERT2. Full-length  $\beta$ -cate-

nin was successfully excised upon 4-hydroxytamoxifen (4OHT) treatment in both cell lines, and  $\Delta$ N  $\beta$ -cat isoforms with a molecular weight of approximately 48 and 52 kDa, respectively, were detected upon CRE recombination (Figures 1B and 1C). Immunofluorescence staining did not show any clear subcellular localization of  $\Delta$ N isoforms, which instead appeared distributed among cytoplasm and nuclei showing little or no membrane localization (Figures 1D and 1E).

To assess if N-terminally truncated isoforms were a product of the *Ctnnb1* genomic locus and not a mere technical artifact, we designed three different short hairpins against three different regions of  $\beta$ -catenin mRNA ( $\beta$ 1-3) (Figure 1F) to silence  $\beta$ -catenin in both knockout (del/del) and parental (fl/fl) mESCs (NL $\beta$ -12<sup>tm4W<sup>b</sup>bm</sup> background). A scrambled short hairpin (shSCR) was used as control. All the short hairpins successfully induced knockdown of  $\beta$ -catenin at protein level (Figure 1G) in wild-type cells, while N-terminally truncated isoforms were depleted efficiently by  $\beta$ 1 and  $\beta$ 3 but not by  $\beta$ 2, which targets the portion of mRNA excised upon CRE-mediated recombination. The same results were confirmed analyzing  $\beta$ -catenin mRNA levels by qRT-PCR using two different primer pairs targeting the CRE-excised region (Figure 1H, left panel), and the 3' UTR (Figure 1H, right panel). The oligonucleotides targeting the excised region failed to detect  $\beta$ -catenin mRNA in knockout cells, while the ones designed on the 3' UTR revealed that mRNA regions downstream of the excision had comparable expression levels in wild-type (NL $\beta$ -12 fl/fl shSCR) and knockout (NL $\beta$ -12 fl/fl del/del shSCR) cells and were efficiently silenced only by  $\beta$ 1 and  $\beta$ 3 but not, as expected, by  $\beta$ 2 (Figure 1H). Importantly, we never observed  $\Delta$ N isoforms in wild-type cells, including cells expressing short hairpins targeting  $\beta$ -catenin, indicating that they are only produced upon recombination of *Ctnnb1* locus.

Next, we characterized SR18 cells (*Ctnnb1*<sup>tm2K<sup>em</sup> fl/del</sup>) upon  $\beta$ -catenin CRE-mediated deletion (Raggioli et al., 2014). Upon 4OHT treatment and consequent  $\beta$ -catenin deletion, clone morphology and alkaline phosphatase (AP) expression (Figure S1A), as well as Nanog and Oct4

(D)  $\beta$ -Catenin immunofluorescence staining on fixed SR18 or NLC1 parental cell lines or upon 72-h +4OHT treatment. A primary antibody raised against the C-terminal portion of  $\beta$ -catenin was used. DAPI was used to counterstain nuclei. Scale bar represents 50  $\mu$ m.

(E) Multichannel fluorescence intensity measurement of immunofluorescence images in (D). Image quantification has been performed across the dashed yellow line depicted in (D), merge panel.

(F) Schematic representation of short-hairpin targeted regions (red triangles,  $\beta$ 1,  $\beta$ 2, and  $\beta$ 3) and qRT-PCR amplicons (blue lines, #1 and #2) along the *Ctnnb1*<sup>tm4W<sup>b</sup>bm</sup> allele.

(G) Western blot of  $\beta$ -catenin of mESCs harboring the Birchmeier  $\beta$ -catenin allele after (*Ctnnb1*<sup>tm4W<sup>b</sup>mdel/del</sup>; left) or before (*Ctnnb1*<sup>tm4W<sup>b</sup>fl/fl</sup>; right) CRE-mediated recombination of the *loxP* sites. Cells were transduced with a control short hairpin (shCtr) or three different short hairpins against  $\beta$ -catenin mRNA ( $\beta$ 1,  $\beta$ 2, or  $\beta$ 3).

(H) qRT-PCR on total mRNA extracts of *Ctnnb1*<sup>tm4W<sup>b</sup>fl/fl</sup> or *Ctnnb1*<sup>tm4W<sup>b</sup>del/del</sup> cells transduced with the short-hairpin constructs used in Figure 1D. Two different amplicons were amplified to monitor deleted region (*Ctnnb1* #1) or 3' UTR (*Ctnnb1* #2). *GAPDH* was used as housekeeping control. Error bars represents standard deviation of technical triplicates.

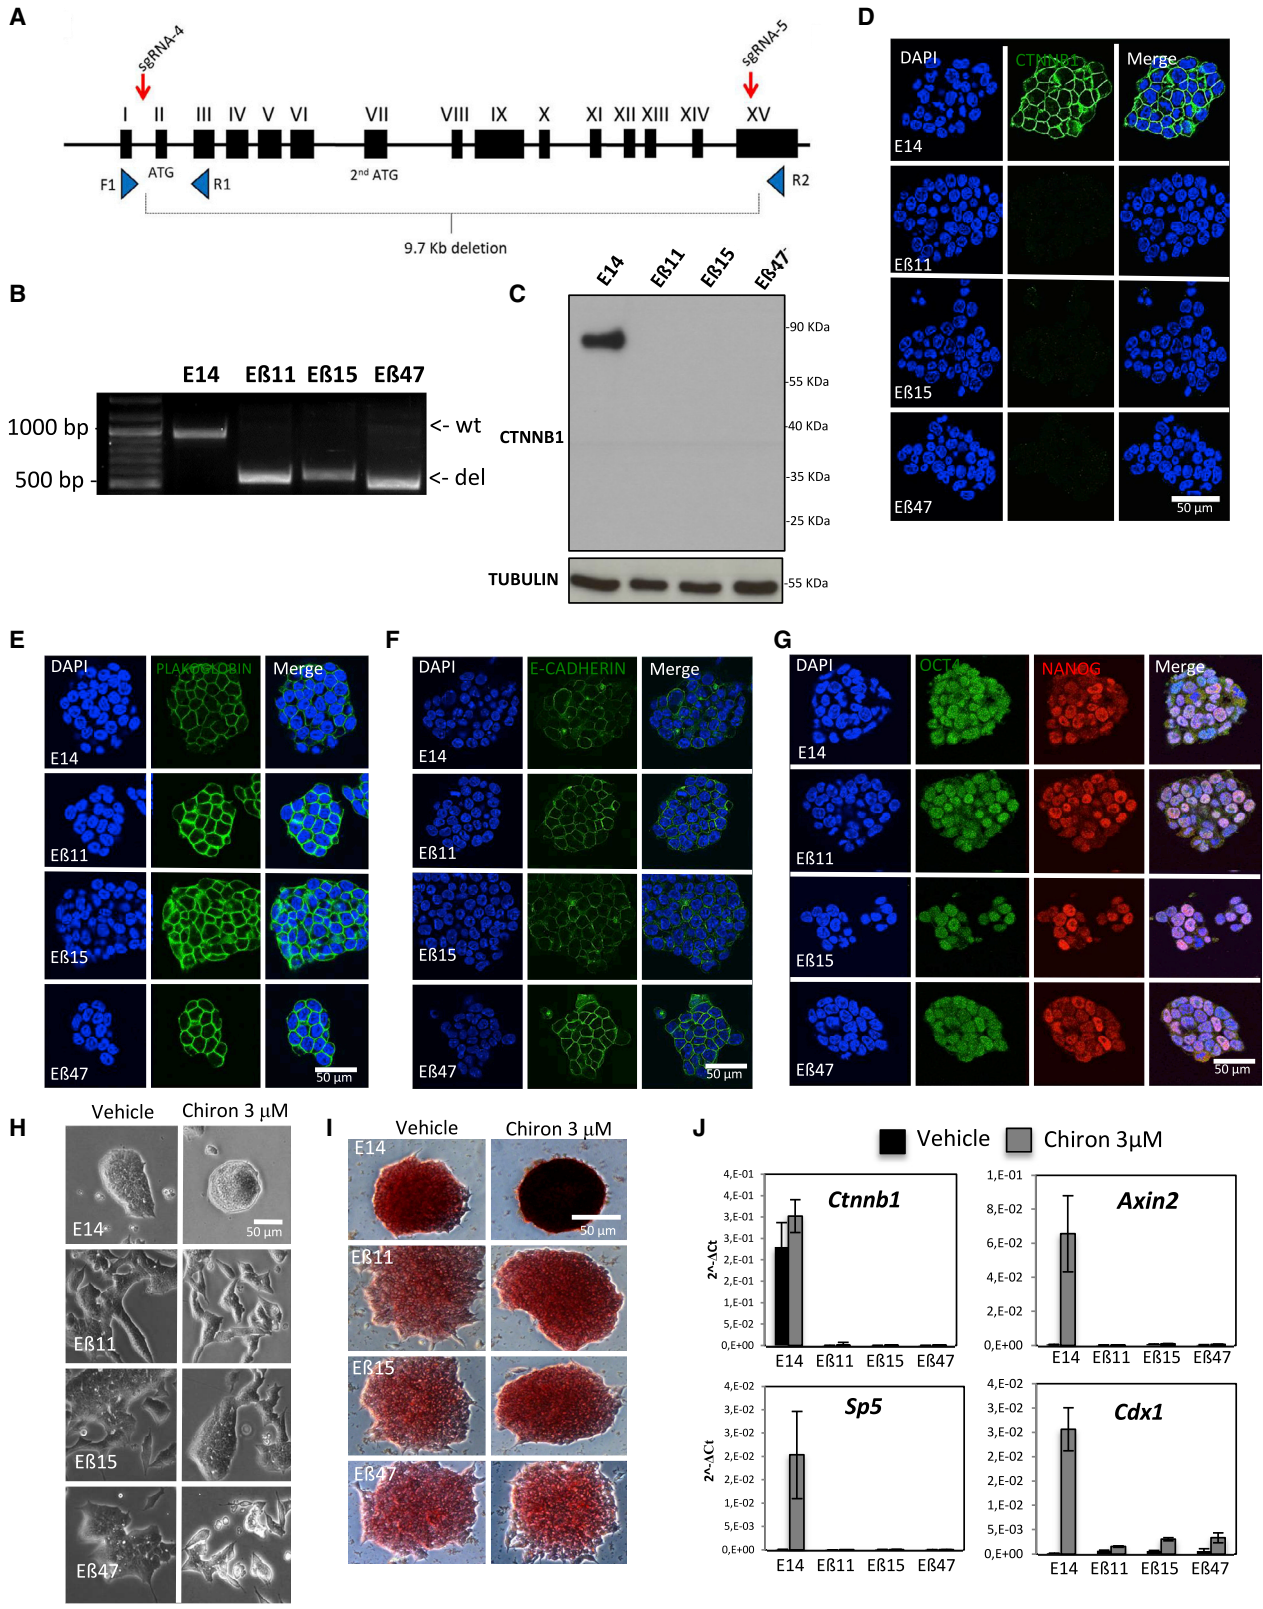

(legend on next page)



expression patterns (Figure S1B), remained unaltered, confirming earlier results (Lyashenko et al., 2011; Wray et al., 2011). The lack of morphological changes upon  $\beta$ -catenin deletion was likely due to compensatory effects by the up-regulation of PLAKOGLOBIN (Figure S1C), as reported by Lyashenko et al. (2011) and Wray et al. (2011). Furthermore, no changes were detected in the protein levels of pluripotency markers (NANOG, OCT4, SOX2) (Figures S1D and S1E). Although these results show that  $\beta$ -catenin loss does not affect morphology and pluripotency markers (confirming results in Lyashenko et al., 2011; Wray et al., 2011), we asked whether the  $\Delta N$  isoforms, produced by *Ctnnb1*<sup>tm2Kem</sup> or the *Ctnnb1*<sup>tm4Wbm</sup> alleles, could be responsible for the maintenance of the observed mESC phenotype.

### Generation of a New $\beta$ -catenin Knockout Model in mESCs Using CRISPR/Cas9 Technology

We generated a full  $\beta$ -catenin knockout mESC line via CRISPR/Cas9 technology. As the presence of  $\Delta N$   $\beta$ -catenin isoforms could be due either to an alternative splicing or to the presence of a secondary ATG on exon VII (Figure 1A), we designed two different single-guide RNA (sgRNA) pairwise combinations (sgRNA1+sgRNA3 and sgRNA2+sgRNA3, resulting in 5,287-bp and 4,970-bp deletion, respectively, Figure S1F) to induce deletions spanning both alternative splicing sites and the entire exon VII. While the editing efficiency of sgRNA2+sgRNA3 was low, sgRNA1+sgRNA3 induced the deletion in a high percentage of cells (Figure S1G) with a significant loss of full-length  $\beta$ -catenin protein in the pool of transfected cells (Figures S1H and S1I). The deletion generated by sgRNA1+sgRNA3 resulted in the production of a new  $\Delta N$  isoform with a lower molecular weight (40 kDa) with respect to the N-terminally truncated isoforms produced by *Ctnnb1*<sup>tm2Kem</sup> (48 kDa) or the *Ctnnb1*<sup>tm4Wbm</sup> (52 kDa) alleles (Figure S1H). The generation of this new  $\Delta N$  isoform could only be explained by the pres-

ence of alternative downstream ATG sites, which, however, were not predictable *a priori*.

In order to eliminate any possible undesired gene-editing product, we sought to induce a 10-kb deletion encompassing the whole gene body. For this aim, we used an additional couple of sgRNAs (sgRNA4+sgRNA5), targeting the *Ctnnb1* locus upstream of the canonical ATG and within a portion of the last coding exon (XV), respectively (Figure 2A). Successful gene editing was confirmed at pool levels by PCR genotyping (Figure S2A). The pool of transfected cells did not show any expansion defect or cell detachment. Single-cell clones were picked, expanded, and finally three independent clones were isolated with homozygous deletions, E $\beta$ 11, E $\beta$ 15, and E $\beta$ 47. All three clones carried homozygous deletion of a 9.7-kb region as assessed by PCR genotyping and Sanger sequencing (Figures 2B and S2B and Supplemental DNA sequences) encompassing the whole  $\beta$ -catenin coding sequence (CDS), therefore preventing *Ctnnb1* locus rearrangement.

Western blot analysis with an antibody raised against the C-terminal portion of  $\beta$ -catenin revealed the absence of any  $\Delta N$  isoform in all the analyzed clones (Figure 2C); this, together with the absence of any detectable signal by immunofluorescence (Figure 2D), confirmed the complete  $\beta$ -catenin depletion in the newly generated clones.

These data demonstrate that, regardless of the gene-editing technology used (CRE-mediated excision or CRISPR/Cas9), the gene-editing by-product cannot be easily predicted, and that complete locus ablation is a viable alternative to avoid undesired protein rearrangements.

### Complete $\beta$ -Catenin Loss Does Not Affect Self-Renewal and Pluripotency Marker Expression in mESCs Cultured in Serum/LIF

In order to characterize the impact of complete  $\beta$ -catenin ablation in mESCs, we analyzed the newly generated cell lines for proliferation, self-renewal, and pluripotency

#### Figure 2. CRISPR/Cas9-Mediated Excision of Whole *Ctnnb1* Locus Results in a Complete $\beta$ -Catenin Knockout Model in mESCs

- (A) Schematic representation of sgRNA design for CRISPR/Cas9-mediated excision of whole  $\beta$ -catenin coding sequence. Red arrows indicate sgRNAs target sites. Blue triangles indicate position and orientation of oligonucleotides used for PCR genotyping.
- (B) PCR genotyping of three homozygous  $\beta$ -catenin knockout clones (E $\beta$ 11, E $\beta$ 15, and E $\beta$ 47) and parental E14 mESCs. Expected amplicon size is 951 bp for wild-type (wt) alleles and 551 bp for knockout alleles (del).
- (C) Western blot of total protein extracts from E $\beta$ 11, E $\beta$ 15, E $\beta$ 47, and wild-type E14 cells. Protein extracts were probed for  $\beta$ -catenin (using a C-terminally raised antibody), stripped and re-probed for TUBULIN as loading control.
- (D–G) Immunofluorescence in fixed parental E14, E $\beta$ 11, E $\beta$ 15, and E $\beta$ 47 cells for  $\beta$ -catenin (D), PLAKOGLOBIN (E), E-CADHERIN (F), OCT4 and NANOG (G). DAPI was used to counterstain nuclei. Scale bar represents 50  $\mu$ m.
- (H) Phase contrast pictures of E $\beta$ 11, E $\beta$ 15, E $\beta$ 47, and parental E14 clones upon 72-h vehicle (0.3% DMSO, left) or Chiron 3  $\mu$ M treatment (right) in serum/LIF. Cells were seeded at  $4 \times 10^5$  cells/well density in 6-well plates. Scale bar represents 50  $\mu$ m.
- (I) Phase contrast pictures of AP staining on E14, E $\beta$ 11, E $\beta$ 15, and E $\beta$ 47 cells cultured in serum/LIF in presence of vehicle (0.3% DMSO, left) or Chiron 3  $\mu$ M (right) for 5 days; 300 cells were seeded in each well of a 6-well plate. Scale bar represents 50  $\mu$ m.
- (J) Histogram of qRT-PCR data on total RNA extracts of E14, E $\beta$ 11, E $\beta$ 15, and E $\beta$ 47 cells exposed to vehicle (0.3% DMSO, black bars) or Chiron 3  $\mu$ M;  $2^{-\Delta Ct}$  are represented, and *GAPDH* was used as internal control. Error bars represent standard deviations of three technical replicates.



marker expression defects under serum/LIF culturing conditions.  $\beta$ -Catenin is normally found at the plasma membrane, where it physically interacts with E-CADHERIN and A-CATENIN connecting adherens junctions to the actin cortex. As in Lyashenko et al. (2011) and Wray et al. (2011), E $\beta$ 11, E $\beta$ 15, and E $\beta$ 47 clones did not show major morphological defects; PLAKOGLOBIN levels were upregulated in response to  $\beta$ -catenin loss (Figures 2E, S2C, and S2D), while E-CADHERIN localization and expression levels remained unchanged (Figures 2F and S2E). We did not detect any difference in the cell-cycle (Figures S2F and S2G) or proliferation rate (Figure S2H) in all three knockout clones with respect to the parental cell lines, which displayed overall comparable population doubling times (Figure S2I).

Similarly to previously reported knockout models (Lyashenko et al., 2011; Raggioli et al., 2014; Wray et al., 2011), complete  $\beta$ -catenin loss did not show any additional defects of NANOG and OCT4 pluripotency marker expression as their localization (Figure 2G) and expression levels (Figure S2C and S2D) remained similar to the parental E14 cell line in all the analyzed clones.

The addition of small-molecule inhibitors of GSK3 activity has been reported to promote mESC pluripotency and self-renewal, while inhibiting spontaneous differentiation, by increasing  $\beta$ -catenin levels and activating the expression of Wnt target genes (Sato et al., 2004).

We therefore monitored the morphological and transcriptional response of  $\beta$ -catenin knockout clones to CHIR99021 (Chiron), a selective small-molecule inhibitor of GSK3. Wild-type and knockout cells were cultured in serum/LIF supplemented with 3  $\mu$ M Chiron or vehicle (DMSO 0.3  $\mu$ L/mL). After 72 h of Chiron treatment, wild-type cells acquired a homogeneous round morphology with tight colony boundaries, while E $\beta$ 11, E $\beta$ 15, and E $\beta$ 47 mESCs did not show any major morphological changes with respect to vehicle (Figure 2H), confirming that morphological changes induced by GSK3 inhibition are mediated by  $\beta$ -catenin (Wray et al., 2011). Morphological defects were only evident when cells were reaching >50% confluency (Figure 2H, vehicle), while  $\beta$ -catenin knockout clones were indistinguishable from wild-type E14 if plated at clonal density (Figure 2I, vehicle).

These data suggest that  $\Delta$ N  $\beta$ -cat isoforms are biologically inactive as complete  $\beta$ -catenin depletion does not result in any additional phenotypic defect with respect to previously characterized knockout models.

Next, we assessed the colony formation capacity and AP expression of wild-type and  $\beta$ -catenin knockout cells in response to GSK3 inhibition. Cells were plated at clonal density and, while cultured in serum/LIF in presence of vehicle, wild-type E14 and  $\beta$ -catenin knockout clones were all positive for AP expression, although  $\beta$ -catenin

knockout cells displayed a slightly lower AP staining intensity (Figures 2I, S2J, and S2K). In presence of Chiron, however, wild-type cells dramatically increased AP staining intensity. By contrast, AP staining intensity in  $\beta$ -catenin knockout cells was only moderately increased in response to Chiron treatment, probably as the result of slightly increased colony compaction (Figures 2I, S2J, and S2K). In addition, the AP transcript (*Alpl*) was upregulated upon Chiron treatment only in wild-type cells (Table S1, WTC/WTV differentially expressed genes [DEGs], row 89).

We then assessed the transcriptional response to GSK3 inhibition in wild-type and  $\beta$ -catenin knockout clones upon 72 h of Chiron treatment through qRT-PCR. As expected, *\beta*-catenin mRNA levels were undetectable in all knockout clones and remained unchanged upon Chiron treatment in wild-type cells. Instead, canonical Wnt targets such as *Axin2* and *Sp5* showed comparable levels between wild-type and knockout cells, while their expression was activated only in wild-type in response to Chiron treatment (Figure 2J). Of note, slightly higher levels of *Cdx1* mRNA were found in all knockout clones in basal conditions with respect to wild-type cells. In addition, although the absence of  $\beta$ -catenin severely impaired *Cdx1* upregulation upon Chiron treatment, it did not completely abrogate it, suggesting that downstream targets of GSK3 contribute to partially regulate its expression (Figure 2J).

### **$\beta$ -Catenin Ablation Promotes a Weak Upregulation of Primitive Endoderm Genes**

According to previously published works, the canonical Wnt pathway is active in mESCs (Ten Berge et al., 2011) and  $\beta$ -catenin nuclear translocation reinforces the pluripotency network by upregulating pluripotency genes such as *Nanog*, *Esrrb*, or *Tcfp2l1* (Martello et al., 2012; Pereira et al., 2006; Qiu et al., 2015) mainly by inhibiting TCF3 repressive activity on their promoters (Pereira et al., 2006). Based on this model, a reasonable consequence of  $\beta$ -catenin ablation would be the increase in TCF3 repressive activity on core-pluripotency network genes with an expected destabilization of self-renewal and pluripotency features. Complete  $\beta$ -catenin loss did not, however, affect Tcf3 levels or its subcellular localization pattern (Figure S2L), suggesting that, in absence of exogenous WNT3A or GSK3 inhibitors,  $\beta$ -catenin does not control TCF3 activity. On the other hand, a previous  $\beta$ -catenin knockout model did not reveal major transcriptomic defects (Lyashenko et al., 2011); due to the lack of characterization of truncated isoforms, a possible explanation for this apparently controversial phenotype could be that  $\Delta$ N  $\beta$ -cat isoforms retain some of the functions of the full-length counterpart, as recently proposed in pre-implantation embryo development (Messerschmidt et al., 2016).

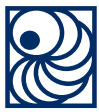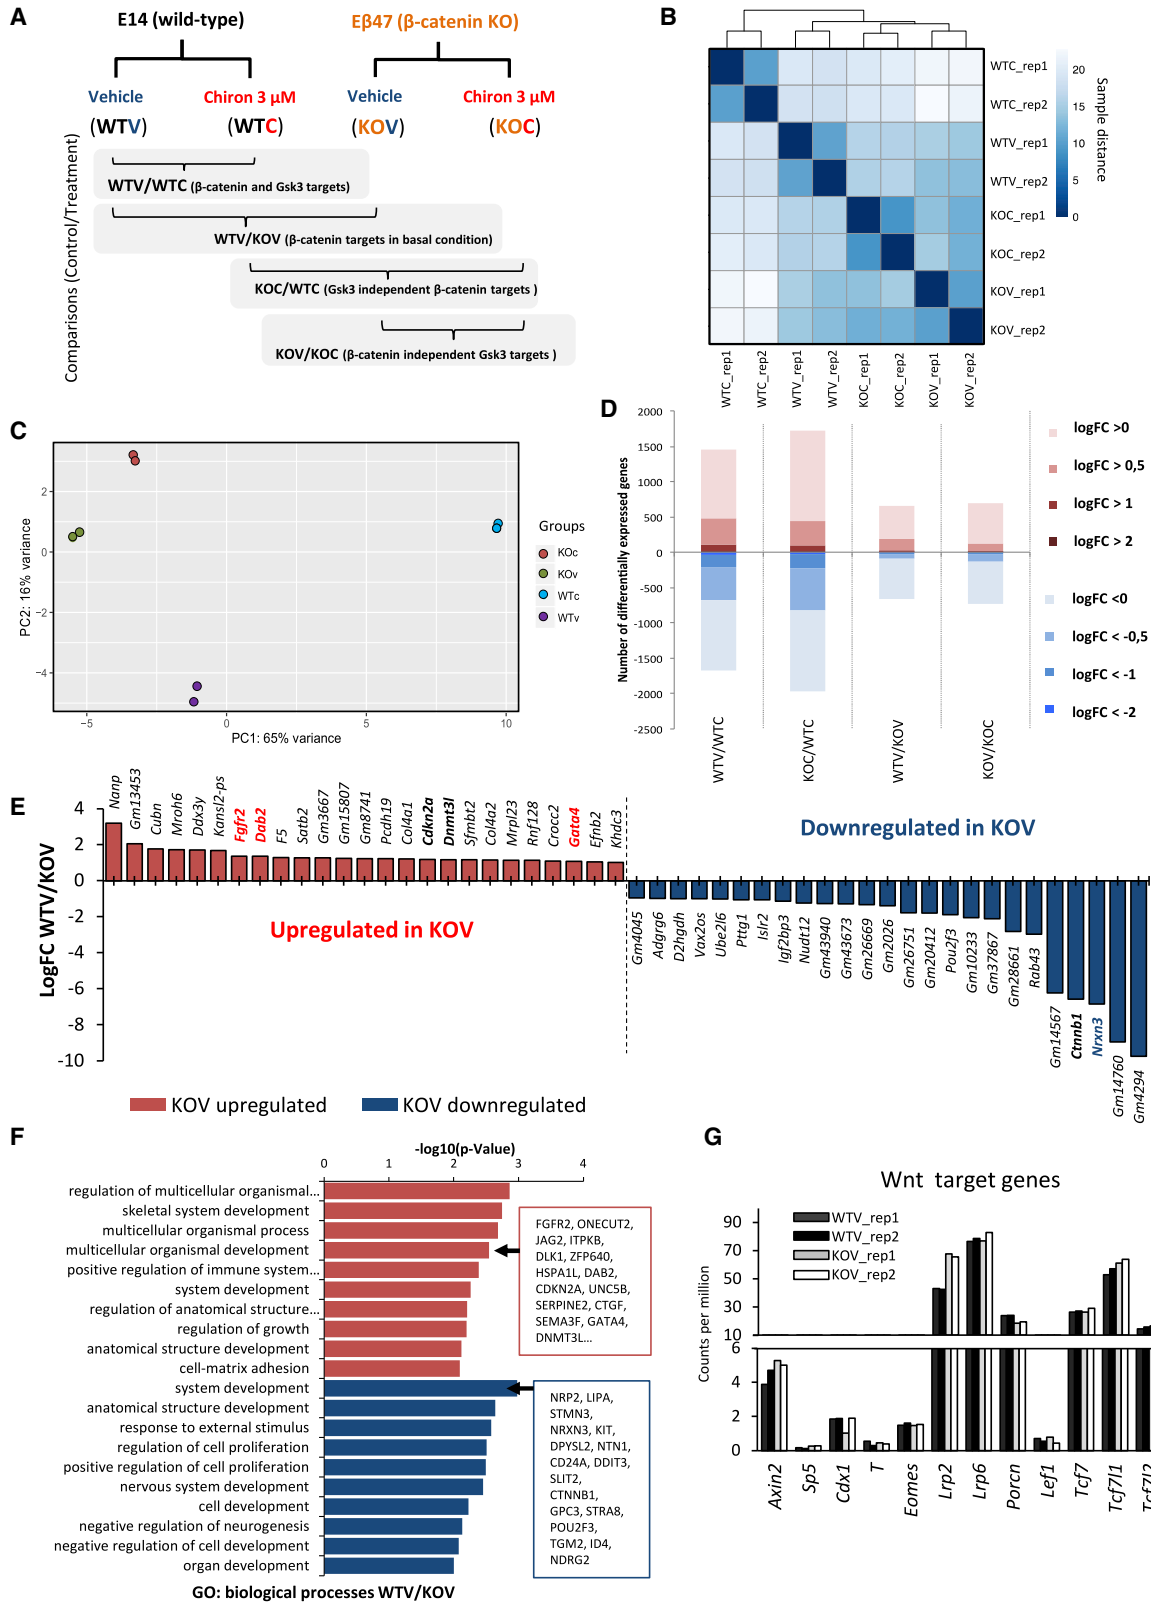

(legend on next page)



We therefore sought to analyze the expression profile of E14 parental cell line and the E $\beta$ 47 knockout clone through high-throughput RNA sequencing (RNA-seq) in cells cultured in serum/LIF culture conditions upon treatment with either vehicle (0.3% DMSO) or 3  $\mu$ M Chiron for 72 h (Figure 3A). Since the impact of complete  $\beta$ -catenin loss in mESCs has never been assessed before at transcriptomic level, we designed an assay to study, through different comparisons between samples, the  $\beta$ -catenin and GSK3-dependent transcriptional changes in mESCs (Figure 3A). As expected,  *$\beta$ -catenin* was not detectable at transcriptional level in E $\beta$ 47 clone (Figure S3A), confirming the difference with previous knockout models in which  *$\beta$ -catenin* mRNA was still detectable (Figure 1F).

The transcriptomic profile of E14 wild-type cells cultured in serum/LIF (WTV), was overall very similar to E $\beta$ 47, independently if cultured in presence of vehicle (KOV) or Chiron (KOC), while E14 wild-type cultured in presence of 3  $\mu$ M Chiron (WTC) clustered away from all the other samples in the samples distance matrix (Figure 3B). Principal component analysis (PCA) showed that the highest amount of variance was due to GSK3 inhibition in presence of  $\beta$ -catenin (WTC samples), while only subtle differences could be spotted between KOC, KOV, and WTV samples (Figure 3C). These results confirmed that, similarly to what was observed in  $\beta$ -catenin knockout models producing N-terminally truncated isoforms (Lyashenko et al., 2011),  $\beta$ -catenin absence does not significantly alter the transcriptional profile of serum/LIF cultured mESCs.

We then analyzed differential expressed genes (DEGs) across different samples/treatments, considering a threshold for adjusted p value <0.05 and absolute log<sub>2</sub> fold change >0.5 (logFC, defined as the log ratio of a transcript's expression values in two different conditions). Upon  $\beta$ -catenin depletion, 286 genes were differentially expressed with respect to E14 cells cultured in serum/LIF + vehicle (WTV/KOV comparison, of which 192 upregulated and 94 downregulated; Figures 3D and S3B and Table S1),

and only 11 genes displayed a logFC higher than 2. Genes such as *Fgfr2*, *Dab2*, *Pdgfra*, and *Gata4* were slightly upregulated upon  $\beta$ -catenin depletion, although with very low fold changes (between 1.2- and 2-fold enrichment), suggesting a partial priming toward primitive endoderm (PrE), while *Neurexin 3* (*Nrxn3*) was downregulated (Figure 3E). We then performed Gene Ontology (GO) analysis on WTV/KOV DEGs (adjusted p value <0.05, logFC > 0.5); both upregulated and downregulated DEGs were enriched for developmental categories such as multicellular organism development and system development (Figure 3F and Table S2). Surprisingly,  $\beta$ -catenin depletion did not alter the expression of canonical Wnt target genes such as *Axin2*, *Sp5*, *Cdx1*, or *T/Brachyury* (Figure 3G), suggesting that canonical Wnt pathway is not transcriptionally active in mESCs cultured in serum/LIF, although  *$\beta$ -catenin* is highly expressed (Figure S3A). These results are in line with previous reports that failed to identify activity of the TOP/FOP reporter in serum/LIF cultured mESCs (Aulicino et al., 2014; De Jaime-Soguero et al., 2017; Faunes et al., 2013), while they stand at odds with the evidence that the Wnt/ $\beta$ -catenin pathway is active in the inner cell mass of the blastocyst, and the canonical Wnt signaling is required for mESC self-renewal in serum/LIF (Ten Berge et al., 2011).

Finally, when analyzing the expression levels of key lineage markers, we could not detect any change in pluripotency genes, while a slight overexpression of PrE lineage markers (*Gata4*, *Gata6*, *Foxa2*, *Dab2*, *Ihh*, *Cerberus*, and *Pdgfra*) was observed independently of Chiron treatment in absence of  $\beta$ -catenin (Figure S3C, bottom).

As colony formation and AP staining phenotypes are slightly ameliorated in  $\beta$ -catenin knockout mESCs in presence of Chiron with respect to vehicle (Figures 2I and S2J), we asked whether GSK3 inhibition per se could alter the transcriptome of mESCs independently of  $\beta$ -catenin. To address this question, we compared E $\beta$ 47 cells cultured in presence of vehicle (KOV) or 3  $\mu$ M Chiron (KOC) for 72h (KOV/KOC comparison). Chiron treatment only resulted

### Figure 3. $\beta$ -Catenin Depletion Produces Minor Changes at Transcriptomic Level

- (A) Schematic representation of experimental design for RNA-seq analysis. E14 parental cells (WT) or E $\beta$ 47 cells (knockout) were cultured in serum/LIF upon 72-h vehicle (0.3% DMSO, V) or Chiron 3  $\mu$ M (C) treatment. Two biological replicates were analyzed for each sample. Pairwise sample comparisons are indicated as control/treatment.
- (B) Sample distance matrix and hierarchical clustering of biological replicates (rep\_1 and rep\_2) for WTV, WTC, KOV, and KOC samples.
- (C) PCA plot of indicated samples.
- (D) Histogram of differentially expressed genes across pairwise comparisons as indicated in Figure 3A. Shades of red indicate overexpressed genes; shades of blue indicate downregulated genes. Shade intensity represents log fold-change cutoff from >0 (no fold-change cutoff, light), to absolute log fold change >2 (dark). Adjusted p value cutoff is 0.05.
- (E) Top differentially expressed genes in WTV/KOV comparison ranked for log fold change. Adjusted p value <0.05.
- (F) GO analysis of biological processes enriched in differentially expressed genes in WTV/KOV comparison (adjusted p value <0.05, absolute logFC >0.5). Upregulated features are shown in red, downregulated features are shown in blue.
- (G) Histogram of RNA level (counts per million reads [CPM]) of canonical Wnt target genes and components across WTV (black and dark gray) or KOV (light gray and white) samples. Individual replicates are shown for each sample.





in minor changes as the transcriptome of KOV and KOC were overall very similar (Figures 3B and 3C). Only 254 genes were differentially expressed in cells lacking  $\beta$ -catenin and exposed to GSK3 chemical inhibition, again with overall low fold change (p value adjusted  $<0.05$  and  $\log_{2}FC >0.5$ , of which 124 upregulated and 130 downregulated) (Figures 3D and S3B and Table S1). Upregulated genes were enriched for biological processes such as stress response and metabolic features, while downregulated genes were enriched for metabolic and developmental processes (Figure S3D and Table S3). Nevertheless, the slight transcriptional changes induced by Chiron in absence of  $\beta$ -catenin revealed a certain degree of overlap with canonical Wnt target genes (Figure S3E). Canonical target genes such as *Myc* or *Axin2* were slightly inhibited by Chiron treatment in absence of  $\beta$ -catenin as well as *Tcf3* (*Tcf711*) mRNA levels (Figure S3F). These data confirm, as previously demonstrated (Doble et al., 2007), that GSK3 inhibition has little or no effect on mESC transcriptional landscape independently of  $\beta$ -catenin. Of note PLAKOGLOBIN can partially mimic  $\beta$ -catenin function (Mahendram et al., 2013), but, although PLAKOGLOBIN protein levels are upregulated in  $\beta$ -catenin knockout cells (Figures 2E, S2C, and S2D), *Plakoglobin* mRNA was not found among the differentially expressed genes upon  $\beta$ -catenin loss, suggesting the existence of a post-translational regulation mechanism for PLAKOGLOBIN that relies on  $\beta$ -catenin levels. In addition, our data demonstrate that Plakoglobin cannot replace nuclear  $\beta$ -catenin functions in response to Chiron in mESCs as no major transcriptional changes were observed in KOV/KOC comparison and, among the canonical Wnt/ $\beta$ -catenin targets, inhibition rather than activation was observed at best (Figures S3E and S3F).

### Canonical Wnt Signaling Inhibits Differentiation of mESCs Toward Ectoderm

Although we assessed that the transcriptional effects of Chiron in absence of  $\beta$ -catenin are negligible, the DEGs in the KOC/WTC comparison were dependent solely on the presence of  $\beta$ -catenin. A similar approach has been used previously (Zhang et al., 2013) by comparing mESCs treated with Chiron or XAV (a small-molecule inhibitor of the Wnt pathway) without considering possible off-target effects of both drugs. Our experimental approach, instead, allowed us to decouple  $\beta$ -catenin-dependent targets (DEGs in KOC/WTC) from GSK3-only-dependent targets (DEGs in KOV/KOC).

The highest number of DEGs between comparisons represented as control/treatment was found in the WTV/WTC (1,157 DEGs, 476 upregulated, 681 downregulated) and in the KOC/WTC (1,259 DEGs, 437 upregulated, 822 downregulated) comparisons (Figures 3D and S3B and Table S1). Wild-type mESCs treated with Chiron clustered far apart

from all the other conditions, as assessed by sample distance matrix PCA (Figures 3B and 3C). Numerous reports associated Wnt activation with transcriptional activation of *Nanog*, *Klf4*, *Esrrb*, and *Tcfp2l1* in mESCs (Ai et al., 2016; Martello et al., 2012; Pereira et al., 2006; Qiu et al., 2015). However, with the exception of a slight *Tcfp2l1* upregulation and *Dppa3* downregulation, we were not able to identify any change at transcriptional levels of pluripotency marker genes upon Chiron treatment in wild-type cells (Figure S3C). Accordingly, we previously showed that *Nanog*, *Oct4*, and *Rex1* levels do not change in mESCs even upon prolonged (up to 8 passages) exposure to Chiron (De Jaime-Soguero et al., 2017). Nevertheless, lineage markers such as *Pax6*, *Fgf1*, *Nes*, *Otx2*, *Lefty1*, and *Pou3f1* were strongly inhibited by Chiron treatment in presence of  $\beta$ -catenin, indicating an overall reduction of differentiation commitment toward the ectoderm lineage (Figure S3C). Conversely, canonical Wnt target genes required for trophoderm and mesoderm specification, including *Cdx1*, *T/Brachyury*, and *Eomes*, were strongly upregulated upon Chiron treatment.

We then clustered the top 100 DEGs in the KOC/WTC comparison across the various samples (Figure 4A). As expected, sample clustering did not change with respect to previous analysis (Figures 3B and 3C) and canonical Wnt targets such as *Axin2*, *Cdx1*, and *T/Brachyury* were only activated in wild-type cells treated with Chiron, while few or no differences were observed in the other samples (Figures 4A and 4C). Furthermore, this subset of genes was transcriptionally perturbed only in presence of both Chiron and  $\beta$ -catenin, once again confirming that the canonical Wnt pathway is not active in mESCs cultured in serum/LIF unless an external stimulus (i.e., chemical GSK3 inhibition) is applied (Figure 4A).

We next asked about the nature of transcriptional changes induced by GSK3 inhibition in presence of  $\beta$ -catenin. We focused once again on the KOC/WTC comparison and performed KEGG (Kyoto Encyclopedia of Genes and Genomes) pathways enrichment and gene ontology (DEGs, KOC/WTC, adjusted p value 0.05,  $\log_{2}FC >0.5$ , Figures 4B and 4D and Table S5). Interestingly, Chiron treatment led to a perturbation of *Tcf/Lef*s levels, with the downregulation of *Tcf3* (*Tcf711*) and the upregulation of *Tcf1* (*Tcf7*) (Figure 4C). Furthermore, downregulated genes were strongly enriched for the mitogen-activated protein kinase (MAPK) signaling pathway (Figure 4B) and for focal adhesion. Both upregulated and downregulated genes were enriched for biological process categories associated with development. Nevertheless, the enrichment was stronger among DEGs downregulated upon Chiron treatment (Figure 4D and Table S5), confirming the general inhibition of spontaneous differentiation induced by the coupled action of GSK3 inhibition and  $\beta$ -catenin.

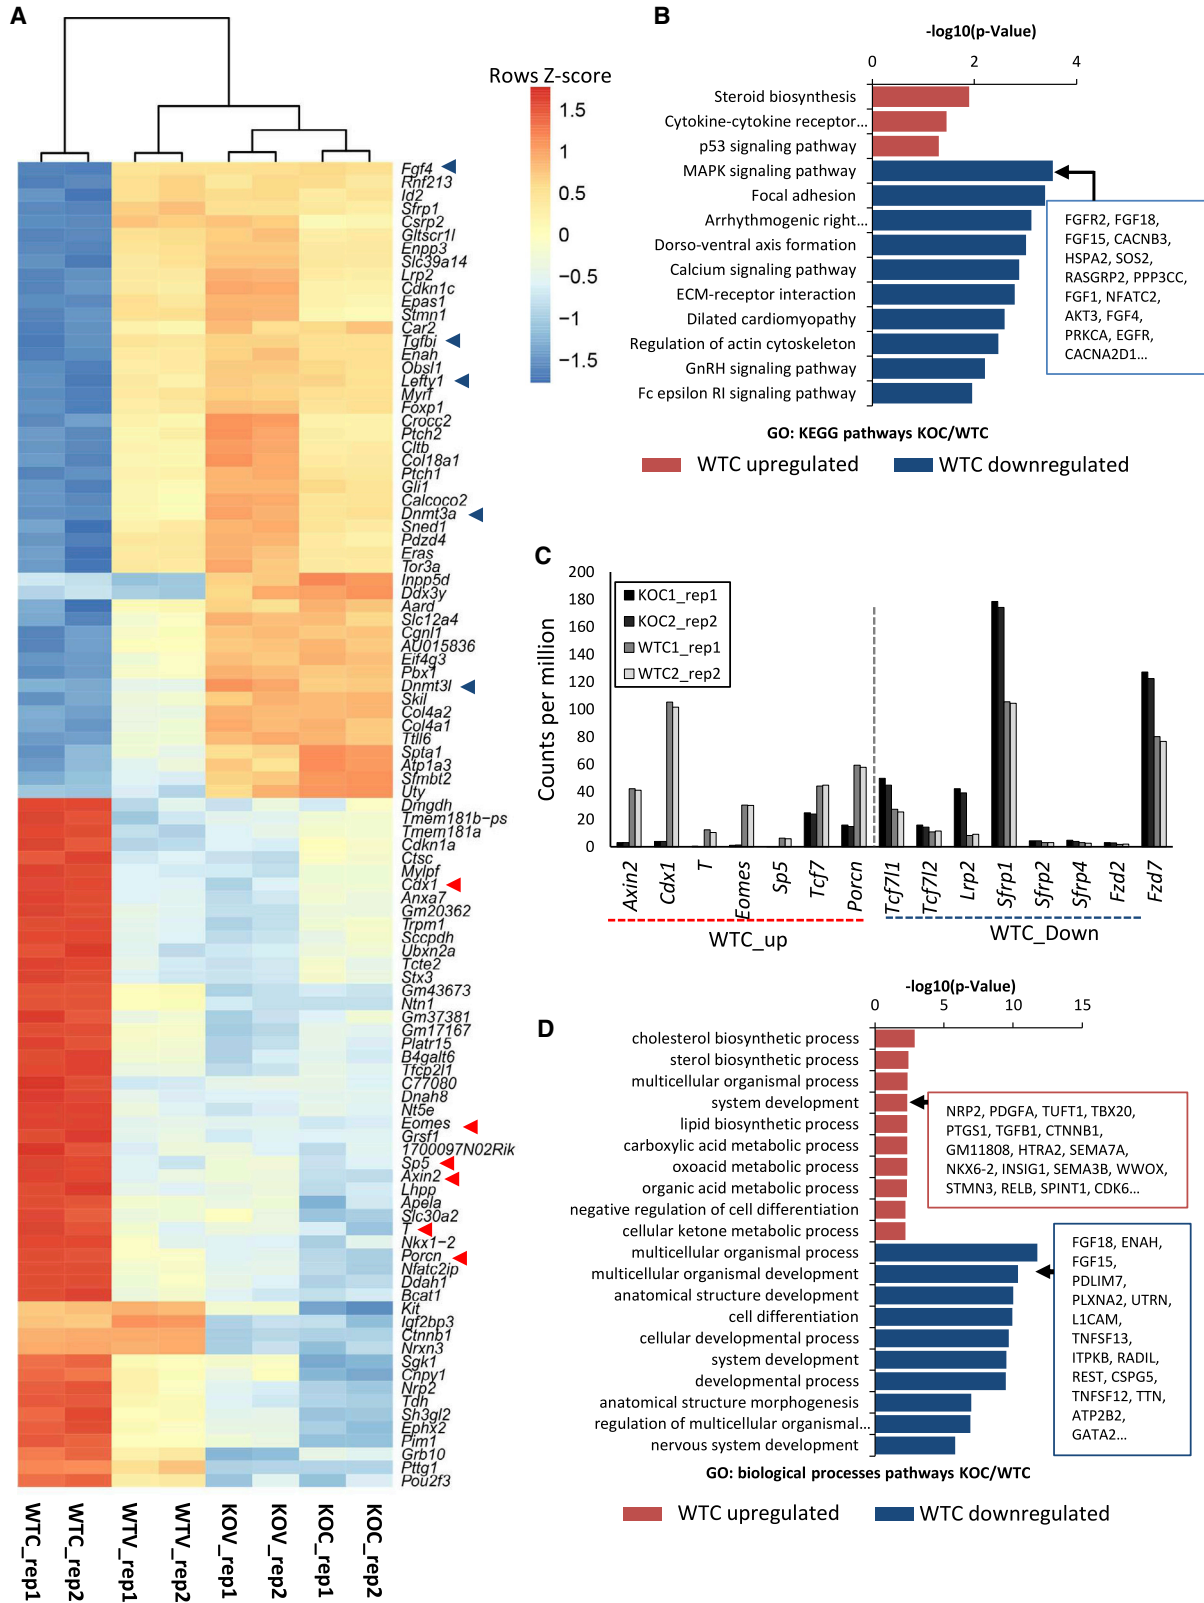

(legend on next page)

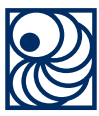

### Transcriptional $\beta$ -Catenin Activity Is Required to Inhibit Differentiation in Absence of LIF

Previous reports have shown that transcriptional activity of  $\beta$ -catenin is dispensable for mESC self-renewal (Lyashenko et al., 2011; Wray et al., 2011). In order to validate or disprove these findings, we generated lentiviruses carrying different  $\beta$ -catenin isoforms. In addition to the full-length  $\beta$ -catenin (wild-type [wt]  $\beta$ cat), an N-terminally truncated ( $\Delta$ N  $\beta$ -cat) and a C-terminally truncated isoform ( $\Delta$ C  $\beta$ -cat) were generated. While  $\Delta$ N  $\beta$ -cat isoforms mimic the isoforms generated from previous knockout models (Messerschmidt et al., 2016),  $\Delta$ C  $\beta$ -cat carries a deletion of the transactivation domain, which results in an impaired transcriptional activity (Figure 5A).

E $\beta$ 47 cells were transduced with a lentivirus carrying the different  $\beta$ -catenin isoforms under the constitutive EF1 $\alpha$  promoter, or an empty lentivirus as a control (EV). Upon isoform expression, we studied protein subcellular localization and expression levels using N-terminal and C-terminal antibodies against  $\beta$ -catenin. N-terminally truncated  $\beta$ -catenin isoforms were only detected with the C-terminal raised antibody, and their subcellular localization recapitulated the one observed in previous knockout models (Figures 5B and 1C). Furthermore, as in  $\Delta$ N  $\beta$ -cat isoforms emerging from previous knockout models, the overall  $\Delta$ N  $\beta$ -cat levels were reduced, as compared to total  $\beta$ -catenin levels in wild-type cells (Figure 5C).

The expression and localization of  $\Delta$ C  $\beta$ -cat and wt  $\beta$ -cat rescue isoforms were overall comparable, with intense membrane localization and similar expression levels (Figures 5B and 5C). Interestingly, expression of  $\Delta$ C and wt  $\beta$ -cat, but not  $\Delta$ N  $\beta$ -cat, restored normal Plakoglobin levels (Figures 5C, 5D, and S4A), indicating that impaired membrane functions, but not the transcriptional ones, are responsible for the increased Plakoglobin levels in  $\beta$ -catenin knockout cells. Similarly,  $\Delta$ N  $\beta$ -cat isoforms could not rescue the loss of morphological changes induced by Chiron treatment, while both  $\Delta$ C and wt rescued E $\beta$ 47 cells exhibited a round morphology (Figure 5E) indistinguishable from E14 wild-type cells upon Chiron addition (Figure 2H). Upon GSK3 inhibition, however, eGFP expression under

the control of the synthetic Wnt reporter was only detectable in wild-type rescued E $\beta$ 47, confirming that both  $\Delta$ N and  $\Delta$ C  $\beta$ -cat isoforms are transcriptionally impaired for canonical Wnt signaling (Figure S4B).

We next assessed the colony formation capacity and AP expression of rescued  $\beta$ -catenin knockout cells in different culture conditions. In serum/LIF, only  $\Delta$ C  $\beta$ -cat and wt  $\beta$ -cat rescued E $\beta$ 47 cells recapitulated the parental E14 cells phenotype, while  $\Delta$ N  $\beta$ -cat overexpression did not alter the phenotype with respect to empty vector transduced cells (EV, Figure S4C, top panel). E $\beta$ 47 showed impaired clonogenicity and self-renewal, in line with previously published knockout models. In serum-free media, E $\beta$ 47 could not be expanded in PD + LIF, Chiron + LIF, or PD + Chiron (2i), but could self-renew in 2i/LIF; again,  $\Delta$ N  $\beta$ -cat rescued E $\beta$ 47 cells did not show any improvement of AP expression or self-renewal (Figure S4C, bottom panel). As previously reported, both  $\Delta$ C  $\beta$ -cat and wt  $\beta$ -cat isoforms restored self-renewal and AP staining intensity defects (Figure S4C, bottom panel), suggesting that canonical Wnt pathway activity is dispensable for self-renewal in these culture conditions.

However, nuclear  $\beta$ -catenin activity appears to be required for inhibition of differentiation in serum and in absence of LIF (Ogawa et al., 2006; Sato et al., 2004). Therefore, we performed clonal assay and AP staining of E $\beta$ 47 rescued cells in serum without LIF. While all the cell lines quickly differentiated in absence of LIF, Chiron treatment maintained AP staining in  $\Delta$ C  $\beta$ -cat and wt  $\beta$ -cat rescued cells, but not in  $\Delta$ N  $\beta$ -cat rescued E $\beta$ 47 (Figures 5F and S4D). Furthermore,  $\Delta$ C  $\beta$ -cat expression only partially rescued AP staining, indicating that canonical Wnt activity is required to counteract spontaneous differentiation upon LIF withdrawal.

These results suggest that the inhibition of spontaneous mESC differentiation in the absence of LIF could be due to combined nuclear and membrane-associated  $\beta$ -catenin functions. However, while the  $\Delta$ C  $\beta$ -cat isoform fails to activate the synthetic Wnt reporter (Figure S4B), it has previously been observed that the  $\Delta$ C  $\beta$ -cat isoform exhibit a certain degree of transcriptional activity, despite lacking

#### Figure 4. RNA-Seq Analysis of $\beta$ -Catenin-Dependent Differentially Expressed Genes

- Heatmap clustering of the top 100 differentially expressed genes in KOC/WTC comparison across KOV, KOC, WTV, and WTC samples (p value adjusted <0.05, absolute logFC >0.5). Minimum and maximum are scaled across conditions on single genes; the heatmap represents logCPM rescaled on each gene for their Z scores (average of the values is the center of a normal distribution; color codes represent positive or negative deviations from the average).
- GO analysis of KEGG pathway categories enriched in differentially expressed genes in the KOC/WTC comparison (p value adjusted <0.05, absolute logFC >0.5).
- Histogram of CPMs of canonical Wnt target genes and components differentially expressed in KOC/WTC comparison. Individual biological replicates are shown.
- GO analysis of biological process categories enriched in differentially expressed genes in KOC/WTC comparison (p value adjusted <0.05, absolute logFC >0.5).

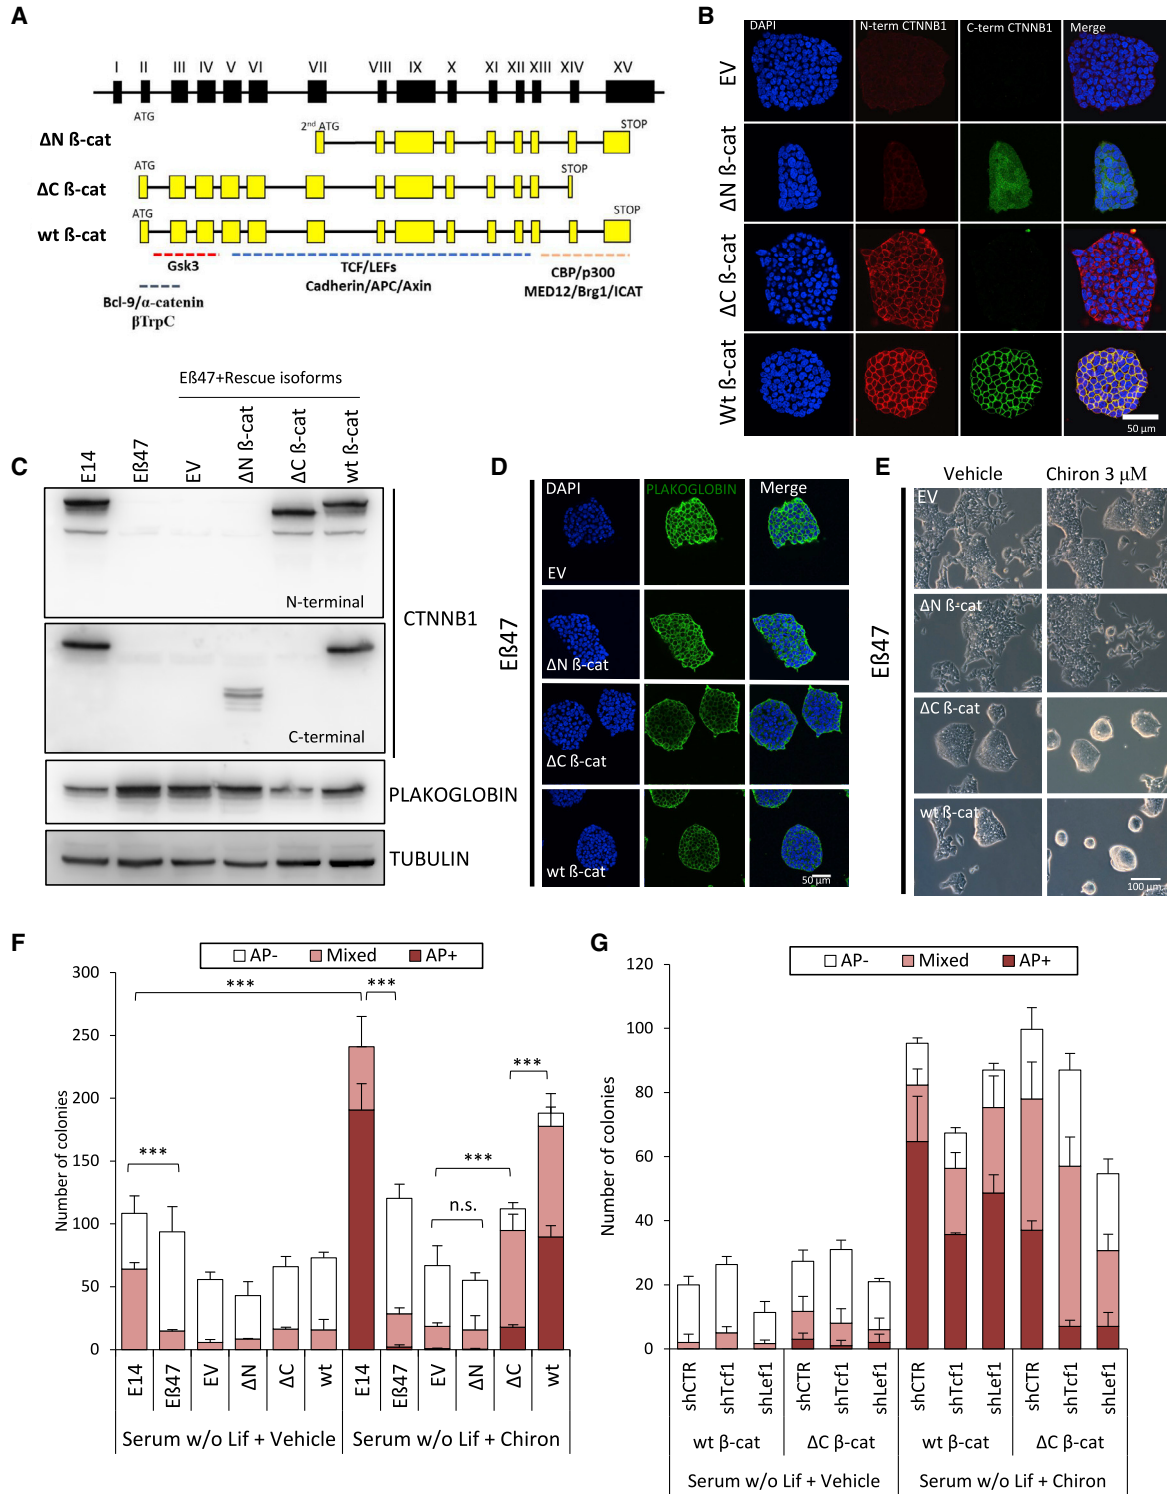

**Figure 5. Canonical  $\beta$ -catenin Functions Are Required for Inhibition of Differentiation**

(A) Schematic representation of  $\beta$ -catenin isoforms used for rescue experiments. N-terminally ( $\Delta N$   $\beta$ -cat) truncated  $\beta$ -catenin isoform mimics N-terminally truncated  $\beta$ -catenin isoforms obtained in previously published knockout models.

(legend continued on next page)



the transactivation domain (Wray et al., 2011). A possible explanation could be that  $\Delta C$   $\beta$ -cat isoforms still interact with TCF3 and, like the full-length  $\beta$ -catenin, alleviate TCF3-mediated repression on a subset of target genes (Wray et al., 2011). On the other hand, it has been reported that  $\Delta C$   $\beta$ -cat isoforms can still form a transcriptionally active complex in association with LEF1 (Hsu et al., 1998) or TCF1. We therefore silenced *Lef1* or *Tcf1* in E $\beta$ 47 cells rescued with either full-length or  $\Delta C$   $\beta$ -cat (Figure S4E) and assessed AP staining intensity upon exposure to vehicle or Chiron in absence of LIF. *Tcf1* or *Lef1* depletion efficiently reduced the number of AP colonies formed in response to Chiron treatment in  $\Delta C$   $\beta$ -cat rescued cells and, to a lesser extent, also in wild-type  $\beta$ -catenin mESCs (Figures 5G and S4F).

These results suggest that  $\Delta C$   $\beta$ -cat could still interact with TCF1 and LEF1, and that nuclear  $\beta$ -catenin/TCF/LEF functions could be required to inhibit mESC spontaneous differentiation in the absence of LIF, while the membrane-associated  $\beta$ -catenin functions may have little or no role in this phenotype.

## DISCUSSION

In this work, we showed that the inducible  $\beta$ -catenin knockout models currently available result in the production of N-terminally truncated isoforms in mESCs. While  $\Delta N$   $\beta$ -cat isoforms are not physiologically expressed, their appearance is a consequence of rather unpredictable gene rearrangement upon genetic manipulation. By using CRISPR-Cas9 technology, we isolated three mESC clones with no detectable  $\beta$ -catenin expression. Of note, only a paired sgRNA approach generating a deletion encompassing the whole  $\beta$ -catenin gene body was successful in generating knockout alleles (10-kb

genomic DNA deletion), while standard strategies (ORF shifting and microdeletion) only produced  $\Delta N$ -truncated isoforms at best. As CRISPR-Cas9 is boosting genetic engineering, the production of undesired isoforms with potential gain of functions, which could undermine all the conclusion of a study, should be carefully monitored and avoided. For this reason, we foresee that whole-gene deletion using CRISPR-Cas9 will be an advantageous approach for generating knockout models free of undesired side products.

We assessed that the appearance of  $\Delta N$   $\beta$ -cat isoforms in previously published  $\beta$ -catenin knockout mESC models is not detrimental for their phenotype, as no compensatory or overlapping effects were to be attributed to the truncated proteins. In addition, none of the impaired phenotypes observed upon complete  $\beta$ -catenin loss could be rescued by a  $\Delta N$   $\beta$ -cat isoform, thus recapitulating the phenotype observed in the previously generated knockout models (Lyashenko et al., 2011; Wray et al., 2011).

$\beta$ -Catenin depletion does not alter self-renewal and pluripotency marker expression of mESCs under serum/LIF culturing conditions, with expected morphological changes probably rescued by Plakoglobin stabilization. Moreover,  $\beta$ -catenin depletion also does not alter the expression of known canonical Wnt targets in basal culturing conditions, suggesting that the Wnt/ $\beta$ -catenin pathway is not constitutively active in mESCs cultured in feeder-free media supplemented with serum/LIF. Accordingly,  $\beta$ -catenin loss does not globally alter the transcriptional profile of mESCs but induces a mild activation of PrE marker genes. The latter phenotype, coupled to the absence of self-renewal and proliferation defects in serum/LIF, could either not be significant or could potentially highlight the presence of a rare population of terminally differentiated cells committed toward PrE that cannot withstand  $\beta$ -catenin absence.

(B) Immunofluorescence of E $\beta$ 47 cells transduced with lentiviral vectors encoding empty vector (EV), wild-type (wt  $\beta$ -cat),  $\Delta N$   $\beta$ -cat, and C-terminally ( $\Delta C$   $\beta$ -cat) truncated  $\beta$ -catenin isoforms. Cells were stained with N-terminally (red) and C-terminally (green)  $\beta$ -catenin antibodies. Nuclei were counterstained with DAPI.

(C) Western blot of total protein extracts from E14 and E $\beta$ 47 untransduced cells and E $\beta$ 47 transduced with EV,  $\Delta N$   $\beta$ -cat,  $\Delta C$   $\beta$ -cat, and wt  $\beta$ -cat encoding lentiviruses. Membranes were probed with N-terminally or C-terminally raised  $\beta$ -catenin antibodies and anti-PLAKOGLOBIN. TUBULIN was used as loading control. Scale bar represents 50  $\mu$ m.

(D) Immunofluorescence of E $\beta$ 47 cells transduced with EV,  $\Delta N$   $\beta$ -cat,  $\Delta C$   $\beta$ -cat, or wt  $\beta$ -cat encoding lentiviruses. Cells were stained for PLAKOGLOBIN. DAPI was used to counterstain nuclei (Scale bar represents 50  $\mu$ m).

(E) Phase contrast pictures of E $\beta$ 47 cells transduced with EV,  $\Delta N$   $\beta$ -cat,  $\Delta C$   $\beta$ -cat, or wt  $\beta$ -cat encoding lentiviruses and cultured in serum/LIF in presence of 3  $\mu$ M Chiron or vehicle (0.3% DMSO). Scale bar represents 100  $\mu$ m.

(F) AP staining quantification of E14 and E $\beta$ 47 untransduced cells or E $\beta$ 47 transduced with EV,  $\Delta N$   $\beta$ -cat,  $\Delta C$   $\beta$ -cat, or wt  $\beta$ -cat encoding lentiviruses. Cells were plated in serum without LIF and supplemented with 3  $\mu$ M Chiron (right) or vehicle (0.3% DMSO, left). Error bars represent standard error of three biological replicates. Student's t test was used to measure statistical significance as indicated, stars indicate p value (n.s. = not significant, \*p < 0.05, \*\*p < 0.01, \*\*\*p < 0.001).

(G) AP staining of E $\beta$ 47 cells transduced with either wt  $\beta$ -cat or  $\Delta C$   $\beta$ -cat encoding lentiviruses. Cells were further transduced with lentivirus encoding short hairpins against *Lef1* (shLef1), *Tcf1* (shTcf1), or shCTR. Cells were cultured in serum without LIF in presence of 3  $\mu$ M Chiron or vehicle (0.3% DMSO) for 1 week and stained for AP expression. Error bars represent standard error of three biological replicates.



Furthermore, only chemical inhibition of GSK3 activates a transcriptional Wnt response in wild-type cells, while eliciting little or no response on  $\beta$ -catenin knockout mESCs, suggesting that Plakoglobin upregulation cannot recapitulate nuclear  $\beta$ -catenin functions. Nevertheless, activation of the canonical Wnt pathway shields mESCs from spontaneous epiblast/ectoderm differentiation by suppressing the expression of lineage-specific genes and not by enhancing the expression levels of pluripotency factors. This effect is particularly evident when cells are deprived of LIF, suggesting overlapping functions between LIF and Wnt signaling in mESC self-renewal. With respect to these functions, Chiron treatment can prolong, but not indefinitely sustain, mESC self-renewal in the absence of LIF. This phenotype is abrogated by  $\beta$ -catenin loss but can be rescued by wild-type  $\beta$ -catenin and, to a lesser extent, by  $\Delta C$   $\beta$ -cat isoforms, posing the question of whether nuclear  $\beta$ -catenin functions are truly required for differentiation inhibition. We demonstrated that TCF1 and LEF1 are involved in the observed phenotypes, as their depletion further impairs the colony formation capacity and AP staining of both wild-type and  $\Delta C$  rescued  $\beta$ -catenin knockout cells. These results suggest that  $\Delta C$   $\beta$ -cat isoforms are not completely transcriptionally silent and can still interact not only with TCF3 (as previously suggested by Wray et al., 2011) but also with other TCF/LEFs; we cannot, however, exclude that other regulatory mechanisms might be involved. Finally, we proved that activation of the canonical Wnt pathway sustains mESC self-renewal through inhibition of spontaneous differentiation; nuclear  $\beta$ -catenin functions, in association with TCF/LEF family members, could play a role in this phenotype.

In the future, it will be particularly interesting to further investigate the transcriptional response of  $\Delta C$ -rescued  $\beta$ -catenin knockout cells to Chiron, as it could pinpoint a subset of powerful transcriptional targets truly responsible for Wnt-mediated self-renewal enhancement. In addition, since most of the observed pluripotency phenotypes are inevitably dependent on the specific culture conditions we used (mostly, serum based and feeder free using gelatin coating), it might be of interest to extend the results presented in this work to study pluripotency phenotypes upon  $\beta$ -catenin deletion in serum-free media and MEK1/2 and GSK3 $\beta$  inhibitors (e.g., 2i/LIF), which can confer ground-state cell pluripotency to mESCs (Ying et al., 2008); notably, 2i/LIF cultured mESCs should better resemble *in vivo* features observed in the inner cell mass in the pre-implantation embryo, where Wnt signaling is active (De Jaime-Soguero et al., 2018; Ten Berge et al., 2011).

## EXPERIMENTAL PROCEDURES

Detailed experimental procedures are provided in [Supplemental Information](#).

## Cell Culture

mESCs E14 (129/Ola strain) were cultured on gelatin-coated plates in ESC medium: DMEM supplemented with 15% FBS (Hyclone), 1 $\times$  non-essential amino acids, 1 $\times$  GlutaMax, 1 $\times$  penicillin/streptomycin, 1 $\times$  2-mercaptoethanol, and 1,000 U/mL LIF ESGRO (Chemicon). mESCs cultured in serum + LIF medium were replated every 3 days at a split ratio from 1:30 following dissociation with trypsin 0.05% EDTA (Gibco). mESCs containing floxed alleles of  $\beta$ -catenin were a kind gift of Prof. Rolf Kemler (SR18 and NLC1 cell lines, stably expressing CRE-ERT2) and Prof. Christine Hartmann (NL $\beta$ -12<sup>tm4Wbm</sup> fl/fl and del/del cells).

For serum-free cultures, mESCs were cultured without feeders or serum in pre-formulated N2B27 medium (NDiff N2B27 base medium, Stem Cell Sciences Ltd, cat. no. SCS-SF-NB-02) supplemented with small-molecule inhibitors PD0325901 (PD, 1  $\mu$ M, Selleck) and CHIRON99021 (CH, 3  $\mu$ M, Selleck) and 1000 U/mL LIF (ESGRO, Millipore). Cells were routinely propagated on 0.1% gelatin-coated plastic and re-plated every 3 days at a split ratio of 1 in 10 following dissociation with Accutase (Gibco) as previously reported (Wray et al., 2011).

Human embryonic kidney 293t (HEK293t) were purchased from ATCC (293T; ATCC CRL-3216) and cultured in DMEM supplemented with 10% FBS (Hyclone), 1 $\times$  penicillin/streptomycin. HEK293t were re-plated every 3 days at a split ratio of 1 in 6 following dissociation with trypsin 0.05% EDTA (Gibco, Life technologies).

## RNA-Seq and Data Analysis

Total RNA from mESCs was extracted with RNAeasy kits (Qiagen) following manufacturer's instructions. RNA integrity check, Poly-A pulldown, and library preparation were performed by CRG genomic facility. Samples were sequenced in two biological replicates to a depth of 30 million reads (100 bp) per sample using Illumina HiSeq. Reads were mapped to a reference transcriptome (mouse transcriptome from Ensembl v80) using kallisto (v0.42.5) (Bray et al., 2016) to generate counts and transcripts per million (TPM) values. We tested for differentially expressed genes for all pairwise conditions using edgeR (Robinson et al., 2010) from raw counts, filtering for genes with adjusted p value <0.05 and logFC > 0.5. [Table S1](#) reports the list of all DEGs across pairwise comparisons regardless of their logFC. GO and KEGG analyses were performed using DAVID (version 6.7) (Huang da et al., 2009; Huang et al., 2007) using differentially expressed genes with adjusted p value <0.05 and logFC > 0.5. For each pairwise comparison, the list of expressed genes in control and analyzed samples was obtained by filtering out all the genes with zero counts in at least one sample. Expressed genes for each pairwise comparison were set as background universe to estimate enriched categories among differentially expressed genes in DAVID (Timmons et al., 2015). A p value threshold of 0.05 was set to determine enrichment of gene ontology categories. Multiple test correction was not performed.

## Data and Code Availability

RNA-seq data that support the findings of this study have been deposited in the NCBI/GEO database (<https://www.ncbi.nlm.nih.gov/geo/>) under accession number GSE143340.



## SUPPLEMENTAL INFORMATION

Supplemental Information can be found online at <https://doi.org/10.1016/j.stemcr.2020.07.019>.

## AUTHOR CONTRIBUTION

F.A., L.M., and M.P.C. wrote the manuscript. F.A. and M.P.C. designed the experiments. M.P.C. supervised the project. F.A., F.S., E.P., and F.L.L. performed the experiments.

## ACKNOWLEDGMENTS

SR18 and NLC1 mESCs cell lines were a kind gift from Professor Rolf Kemler. NL $\beta$ -12 (Ctnnb1<sup>tm4Wbm fl/fl</sup> and Ctnnb1<sup>tm4Wbm del/del</sup>) were a kind gift from Professor Christine Hartmann.

The authors would like to thank the Genomics Unit at the CRG for assistance with the mRNA-seq (library prep and sequencing), and CRG and the Bristol University flow-cytometry facilities. This work was supported by the European Union's Horizon2020 Research and Innovation Programme (CellViewer No 686637 to M.P.C.), Ministerio de Ciencia e Innovación, grant BFU2017-86760-P (AEI/FEDER, UE), and an AGAUR grant from Secretaria d'Universitats i Recerca del Departament d'Empresa i Coneixement de la Generalitat de Catalunya (2017 SGR 689 to M.P.C.). We acknowledge the support of the Spanish Ministry of Science and Innovation to the EMBL partnership, the Centro de Excelencia Severo Ochoa, and the CERCA Programme/Generalitat de Catalunya and Ministerio de Ciencia e Innovación FPI (to F.A.), La Caixa international PhD fellowship (to F.S.); KU Leuven C1 funds (C14/16/078) and FWO (G097618N) funds to F.L.L. We acknowledge the support of the Medical Research Council (grant MR/N021444/1) to L.M., and of the Engineering and Physical Sciences Research Council (grants EP/R041695/1 and EP/S01876X/1) to L.M.

The funders had no role in study design, data collection and analysis, decision to publish, or preparation of the manuscript.

Received: June 30, 2019

Revised: July 26, 2020

Accepted: July 27, 2020

Published: August 20, 2020

## REFERENCES

Ai, Z., Shao, J., Wu, Y., Yu, M., Du, J., Shi, X., Zhang, Y., and Guo, Z. (2016). CHIR99021 enhances Klf4 expression through beta-catenin signaling and miR-7a regulation in J1 mouse embryonic stem cells. *PLoS One* *11*, e0150936.

Anton, R., Kestler, H.A., and Kuhl, M. (2007). Beta-catenin signaling contributes to stemness and regulates early differentiation in murine embryonic stem cells. *FEBS Lett.* *581*, 5247–5254.

Aulicino, F., Theka, I., Ombrato, L., Lluís, F., and Cosma, M.P. (2014). Temporal perturbation of the Wnt signaling pathway in the control of cell reprogramming is modulated by TCF1. *Stem Cell Reports* *2*, 707–720.

Bray, N.L., Pimentel, H., Melsted, P., and Pachter, L. (2016). Near-optimal probabilistic RNA-seq quantification. *Nat. Biotechnol.* *34*, 525–527.

De Jaime-Soguero, A., Abreu de Oliveira, W.A., and Lluís, F. (2018). The pleiotropic effects of the canonical Wnt pathway in early development and pluripotency. *Genes* *9*, 93.

De Jaime-Soguero, A., Aulicino, F., Ertaylan, G., Griego, A., Cerrato, A., Tallam, A., Del Sol, A., Cosma, M.P., and Lluís, F. (2017). Wnt/Tcf1 pathway restricts embryonic stem cell cycle through activation of the Ink4/Arf locus. *PLoS Genet.* *13*, e1006682.

De Vries, W.N., Evsikov, A.V., Haac, B.E., Fancher, K.S., Holbrook, A.E., Kemler, R., Solter, D., and Knowles, B.B. (2004). Maternal beta-catenin and E-cadherin in mouse development. *Development* *131*, 4435–4445.

Doble, B.W., Patel, S., Wood, G.A., Kockeritz, L.K., and Woodgett, J.R. (2007). Functional redundancy of GSK-3 $\alpha$  and GSK-3 $\beta$  in Wnt/beta-catenin signaling shown by using an allelic series of embryonic stem cell lines. *Dev. Cell* *12*, 957–971.

Faunes, F., Hayward, P., Descalzo, S.M., Chatterjee, S.S., Balayo, T., Trott, J., Christoforou, A., Ferrer-Vaquer, A., Hadjantonakis, A.K., Dasgupta, R., et al. (2013). A membrane-associated beta-catenin/Oct4 complex correlates with ground-state pluripotency in mouse embryonic stem cells. *Development* *140*, 1171–1183.

Hsu, S.C., Galceran, J., and Grosschedl, R. (1998). Modulation of transcriptional regulation by LEF-1 in response to Wnt-1 signaling and association with beta-catenin. *Mol. Cell Biol.* *18*, 4807–4818.

Huang da, W., Sherman, B.T., and Lempicki, R.A. (2009). Systematic and integrative analysis of large gene lists using DAVID bioinformatics resources. *Nat. Protoc.* *4*, 44–57.

Huang, D.W., Sherman, B.T., Tan, Q., Kir, J., Liu, D., Bryant, D., Guo, Y., Stephens, R., Baseler, M.W., Lane, H.C., et al. (2007). DAVID Bioinformatics Resources: expanded annotation database and novel algorithms to better extract biology from large gene lists. *Nucleic Acids Res.* *35*, W169–W175.

Lluís, F., Ombrato, L., Pedone, E., Pepe, S., Merrill, B.J., and Cosma, M.P. (2011). T-cell factor 3 (Tcf3) deletion increases somatic cell reprogramming by inducing epigenome modifications. *Proc. Natl. Acad. Sci. U S A* *108*, 11912–11917.

Lluís, F., Pedone, E., Pepe, S., and Cosma, M.P. (2008). Periodic activation of Wnt/beta-catenin signaling enhances somatic cell reprogramming mediated by cell fusion. *Cell Stem Cell* *3*, 493–507.

Lyashenko, N., Winter, M., Migliorini, D., Biechele, T., Moon, R.T., and Hartmann, C. (2011). Differential requirement for the dual functions of beta-catenin in embryonic stem cell self-renewal and germ layer formation. *Nat. Cell Biol.* *13*, 753–761.

Mahendram, S., Kelly, K.F., Paez-Parent, S., Mahmood, S., Polena, E., Cooney, A.J., and Doble, B.W. (2013). Ectopic gamma-catenin expression partially mimics the effects of stabilized beta-catenin on embryonic stem cell differentiation. *PLoS One* *8*, e65320.

Martello, G., Sugimoto, T., Diamanti, E., Joshi, A., Hannah, R., Ohtsuka, S., Gottgens, B., Niwa, H., and Smith, A. (2012). Esrrb is a pivotal target of the GSK3/Tcf3 axis regulating embryonic stem cell self-renewal. *Cell Stem Cell* *11*, 491–504.

Marucci, L., Pedone, E., Di Vicino, U., Sanuy-Escribano, B., Isalan, M., and Cosma, M.P. (2014).  $\beta$ -catenin fluctuates in mouse ESCs and is essential for Nanog-mediated reprogramming of somatic cells to pluripotency. *Cell Rep.* *8*, 1686–1696.



- Messerschmidt, D., de Vries, W.N., Lorthongpanich, C., Balu, S., Solter, D., and Knowles, B.B. (2016).  $\beta$ -catenin-mediated adhesion is required for successful preimplantation mouse embryo development. *Development* *143*, 1993–1999.
- Ogawa, K., Nishinakamura, R., Iwamatsu, Y., Shimosato, D., and Niwa, H. (2006). Synergistic action of Wnt and LIF in maintaining pluripotency of mouse ES cells. *Biochem. Biophys. Res. Commun.* *343*, 159–166.
- Pereira, L., Yi, F., and Merrill, B.J. (2006). Repression of Nanog gene transcription by Tcf3 limits embryonic stem cell self-renewal. *Mol. Cell Biol.* *26*, 7479–7491.
- Qiu, D., Ye, S., Ruiz, B., Zhou, X., Liu, D., Zhang, Q., and Ying, Q.L. (2015). Klf2 and Tfc2l1, two Wnt/ $\beta$ -catenin targets, act synergistically to induce and maintain naive pluripotency. *Stem Cell Reports* *5*, 314–322.
- Raggioli, A., Junghans, D., Rudloff, S., and Kemler, R. (2014).  $\beta$ -catenin is vital for the integrity of mouse embryonic stem cells. *PLoS One* *9*, e86691.
- Robinson, M.D., McCarthy, D.J., and Smyth, G.K. (2010). edgeR: a Bioconductor package for differential expression analysis of digital gene expression data. *Bioinformatics* *26*, 139–140.
- Sato, N., Meijer, L., Skaltsounis, L., Greengard, P., and Brivanlou, A.H. (2004). Maintenance of pluripotency in human and mouse embryonic stem cells through activation of Wnt signaling by a pharmacological GSK-3-specific inhibitor. *Nat. Med.* *10*, 55–63.
- Ten Berge, D., Kurek, D., Blauwkamp, T., Koole, W., Maas, A., Eroglu, E., Siu, R.K., and Nusse, R. (2011). Embryonic stem cells require Wnt proteins to prevent differentiation to epiblast stem cells. *Nat. Cell Biol.* *13*, 1070–1075.
- Timmons, J.A., Szkop, K.J., and Gallagher, I.J. (2015). Multiple sources of bias confound functional enrichment analysis of global -omics data. *Genome Biol.* *16*, 186.
- Wagner, R.T., Xu, X., Yi, F., Merrill, B.J., and Cooney, A.J. (2010). Canonical Wnt/ $\beta$ -catenin regulation of liver receptor homolog-1 mediates pluripotency gene expression. *Stem Cells* *28*, 1794–1804.
- Wray, J., Kalkan, T., Gomez-Lopez, S., Eckardt, D., Cook, A., Kemler, R., and Smith, A. (2011). Inhibition of glycogen synthase kinase-3 alleviates Tcf3 repression of the pluripotency network and increases embryonic stem cell resistance to differentiation. *Nat. Cell Biol.* *13*, 838–845.
- Ying, Q.-L., Wray, J., Nichols, J., Batlle-Morera, L., Doble, B., Woodgett, J., Cohen, P., and Smith, A. (2008). The ground state of embryonic stem cell self-renewal. *Nature* *453*, 519–523.
- Zhang, X., Peterson, K.A., Liu, X.S., McMahon, A.P., and Ohba, S. (2013). Gene regulatory networks mediating canonical Wnt signal-directed control of pluripotency and differentiation in embryo stem cells. *Stem Cells* *31*, 2667–2679.



**Stem Cell Reports, Volume 15**

**Supplemental Information**

**Canonical Wnt Pathway Controls mESC Self-Renewal Through Inhibition of Spontaneous Differentiation via  $\beta$ -Catenin/TCF/LEF Functions**

**Francesco Aulicino, Elisa Pedone, Francesco Sottile, Frederic Lluís, Lucia Marucci, and Maria Pia Cosma**

## Supplemental information

### Contents

|                                                                                                                                                                  |    |
|------------------------------------------------------------------------------------------------------------------------------------------------------------------|----|
| Supplemental figures .....                                                                                                                                       | 2  |
| Figure S1 – Knock-out models producing N-terminally truncated isoforms display normal clonogenicity and pluripotency marker expression. Related to Figure 1..... | 3  |
| Figure S2 – Characterization of $\beta$ -catenin knock-out clones. Related to Figure 2.....                                                                      | 5  |
| Figure S3 – RNA-seq analysis of $\beta$ -catenin depletion and Gsk3 inhibition in mESCs. Related to Figure 3.....                                                | 7  |
| Figure S4 – Canonical $\beta$ -catenin functions are required for inhibition of differentiation. Related to Figure 5.....                                        | 9  |
| Supplemental Tables.....                                                                                                                                         | 10 |
| Table S1 - Differentially expressed genes across pairwise comparisons .....                                                                                      | 10 |
| Table S2 - WTV_KOV Gene ontology summary .....                                                                                                                   | 10 |
| Table S3 - KOV_KOC Gene ontology summary .....                                                                                                                   | 10 |
| Table S4 - WTV_WTC Gene ontology summary .....                                                                                                                   | 10 |
| Table S5 - KOC_WTC Gene ontology summary.....                                                                                                                    | 10 |
| Table S6 – List of oligonucleotides, antibodies and PCR genotyping assays .....                                                                                  | 10 |
| Supplemental experimental procedures .....                                                                                                                       | 10 |
| qRT-PCR.....                                                                                                                                                     | 10 |
| Western blot, immunofluorescence, flow-cytometry and alkaline phosphatase staining .....                                                                         | 10 |
| Constructs.....                                                                                                                                                  | 11 |
| Supplemental DNA sequences .....                                                                                                                                 | 12 |
| Sanger sequencing – related to Figure S2B .....                                                                                                                  | 12 |
| Plasmid maps and sequences .....                                                                                                                                 | 13 |
| Generation of Ctnnb1 KO cells.....                                                                                                                               | 25 |
| Cell cycle and proliferation analysis .....                                                                                                                      | 25 |
| Lentivirus production .....                                                                                                                                      | 25 |
| Supplemental references .....                                                                                                                                    | 25 |

Supplemental figures

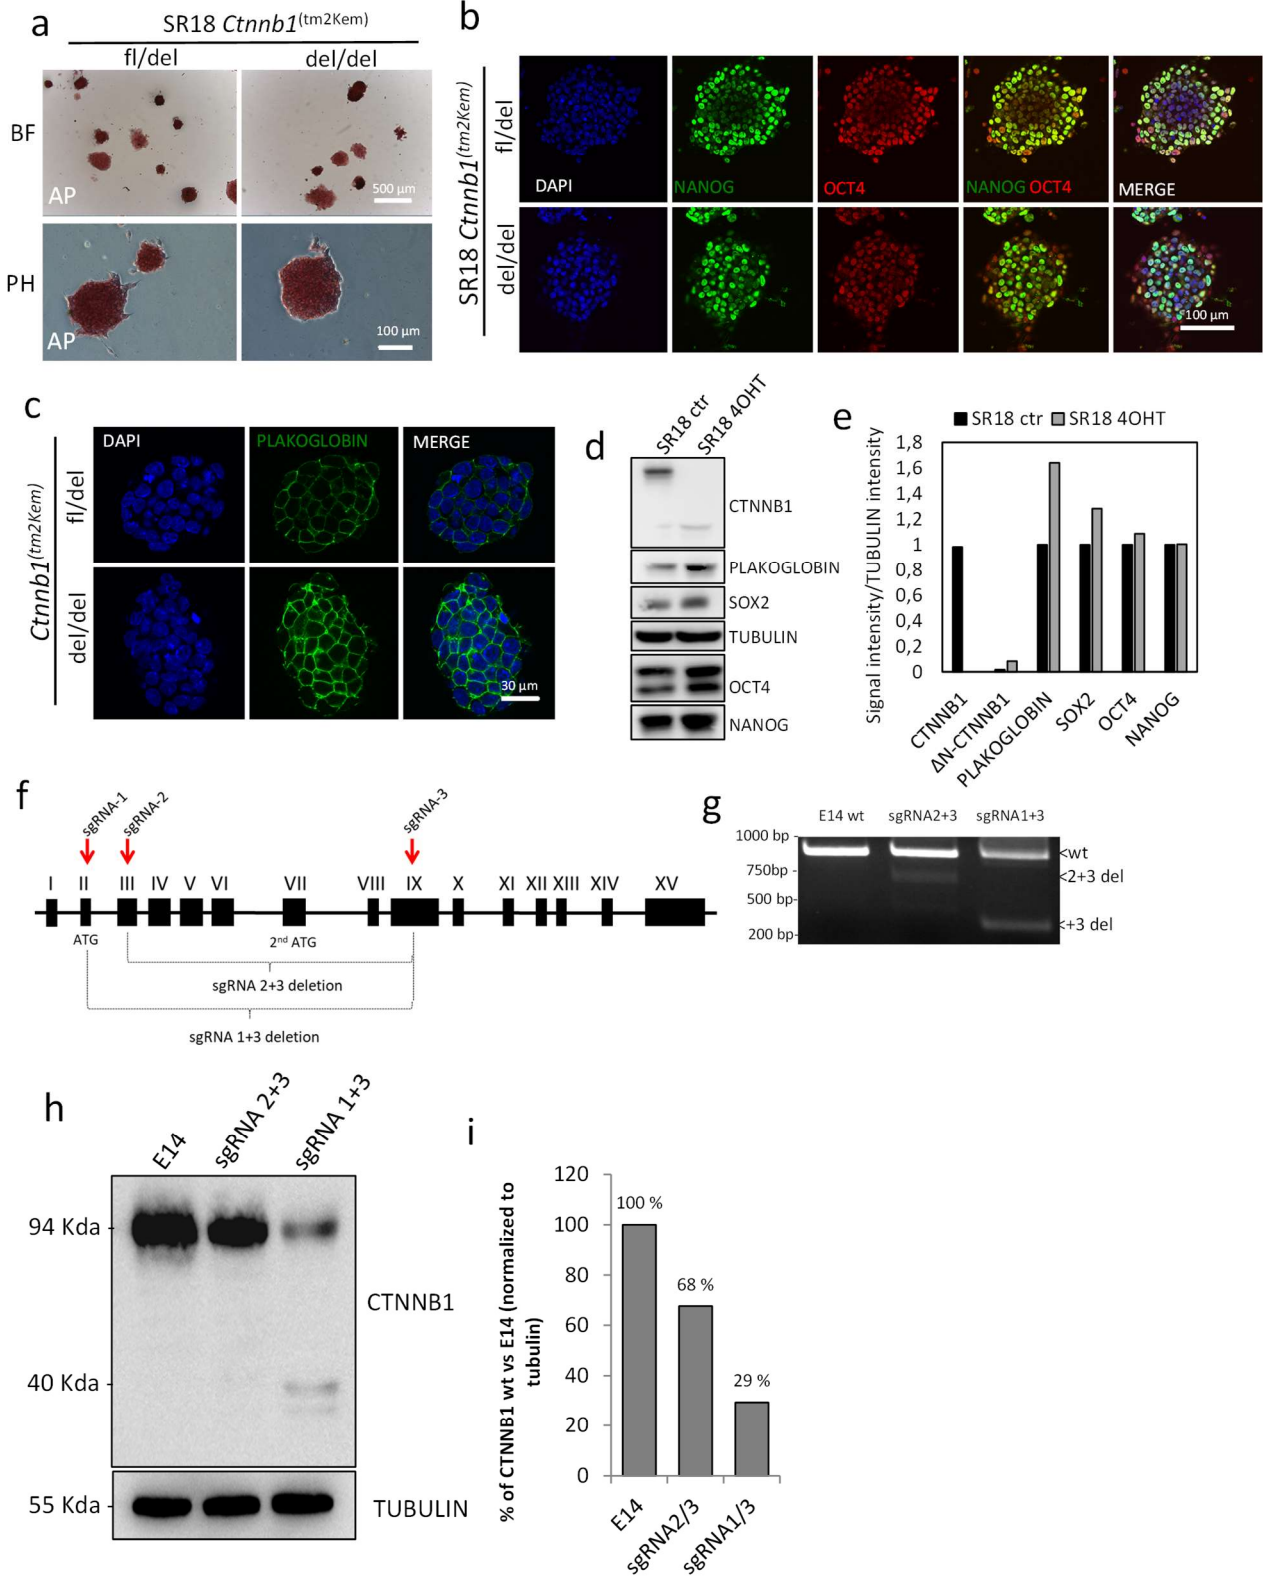

Figure S1

**Figure S1 – Knock-out models producing N-terminally truncated isoforms display normal clonogenicity and pluripotency marker expression. Related to Figure 1.**

**a)** SR18 *Ctnnb1<sup>fl/del</sup>* or *Ctnnb1<sup>del/del</sup>* display overall similar AP staining expression and morphology. BF=brightfield (scalebar=500  $\mu\text{m}$ ), PH=phase contrast (scalebar=100  $\mu\text{m}$ ). **b)** Immunofluorescence of Nanog and Oct4 on fixed SR18 *Ctnnb1<sup>fl/del</sup>* or *Ctnnb1<sup>del/del</sup>* cells. Scalebar=100  $\mu\text{m}$ . DAPI was used to counterstain nuclei. **c)** Immunofluorescence of Plakoglobin on fixed SR18 *Ctnnb1<sup>fl/del</sup>* or *Ctnnb1<sup>del/del</sup>* cells. Scalebar=30  $\mu\text{m}$ . DAPI was used to counterstain nuclei. **d,** **e)** Western blot (d) and quantification (e) of total protein extracts of SR18 *Ctnnb1<sup>fl/del</sup>* (SR18 ctr) or *Ctnnb1<sup>del/del</sup>* (SR18 4OHT) cells. Protein extracts were probed for  $\beta$ -catenin (CTNNB1), PLAKOGLOBIN, SOX2, OCT4 and NANOG. TUBULIN was used as loading control. **f)** Schematic representation of sgRNAs target positions along the  *$\beta$ -catenin* locus. sgRNAs were used in pairwise combinations to excise different gene regions. sgRNAs are represented as red arrows, indicating the position and orientation of oligonucleotides used for PCR genotyping (3 oligos PCR). **g)** PCR-genotyping of E14 mESCs transiently transfected with Cas9 and pairwise combinations of sgRNAs as depicted in f). Untransfected cells were used as parental control. Expected amplicon size is 824 bp for wild-type, 595 bp for sgRNA2+sgRNA3, 278 bp for sgRNA1+sgRNA3. **h)** Western blot for  $\beta$ -catenin on total protein extract of E14 mESCs parental cell line, or upon transient transfection of Cas9 and pairwise combination of sgRNAs as in f). TUBULIN was used as a loading control. **i)** Quantification of full-length  $\beta$ -catenin deletion in g).  $\beta$ -catenin band intensity was normalized on Tubulin intensity for each sample and then rescaled as a percentage of the untransfected parental cell line.

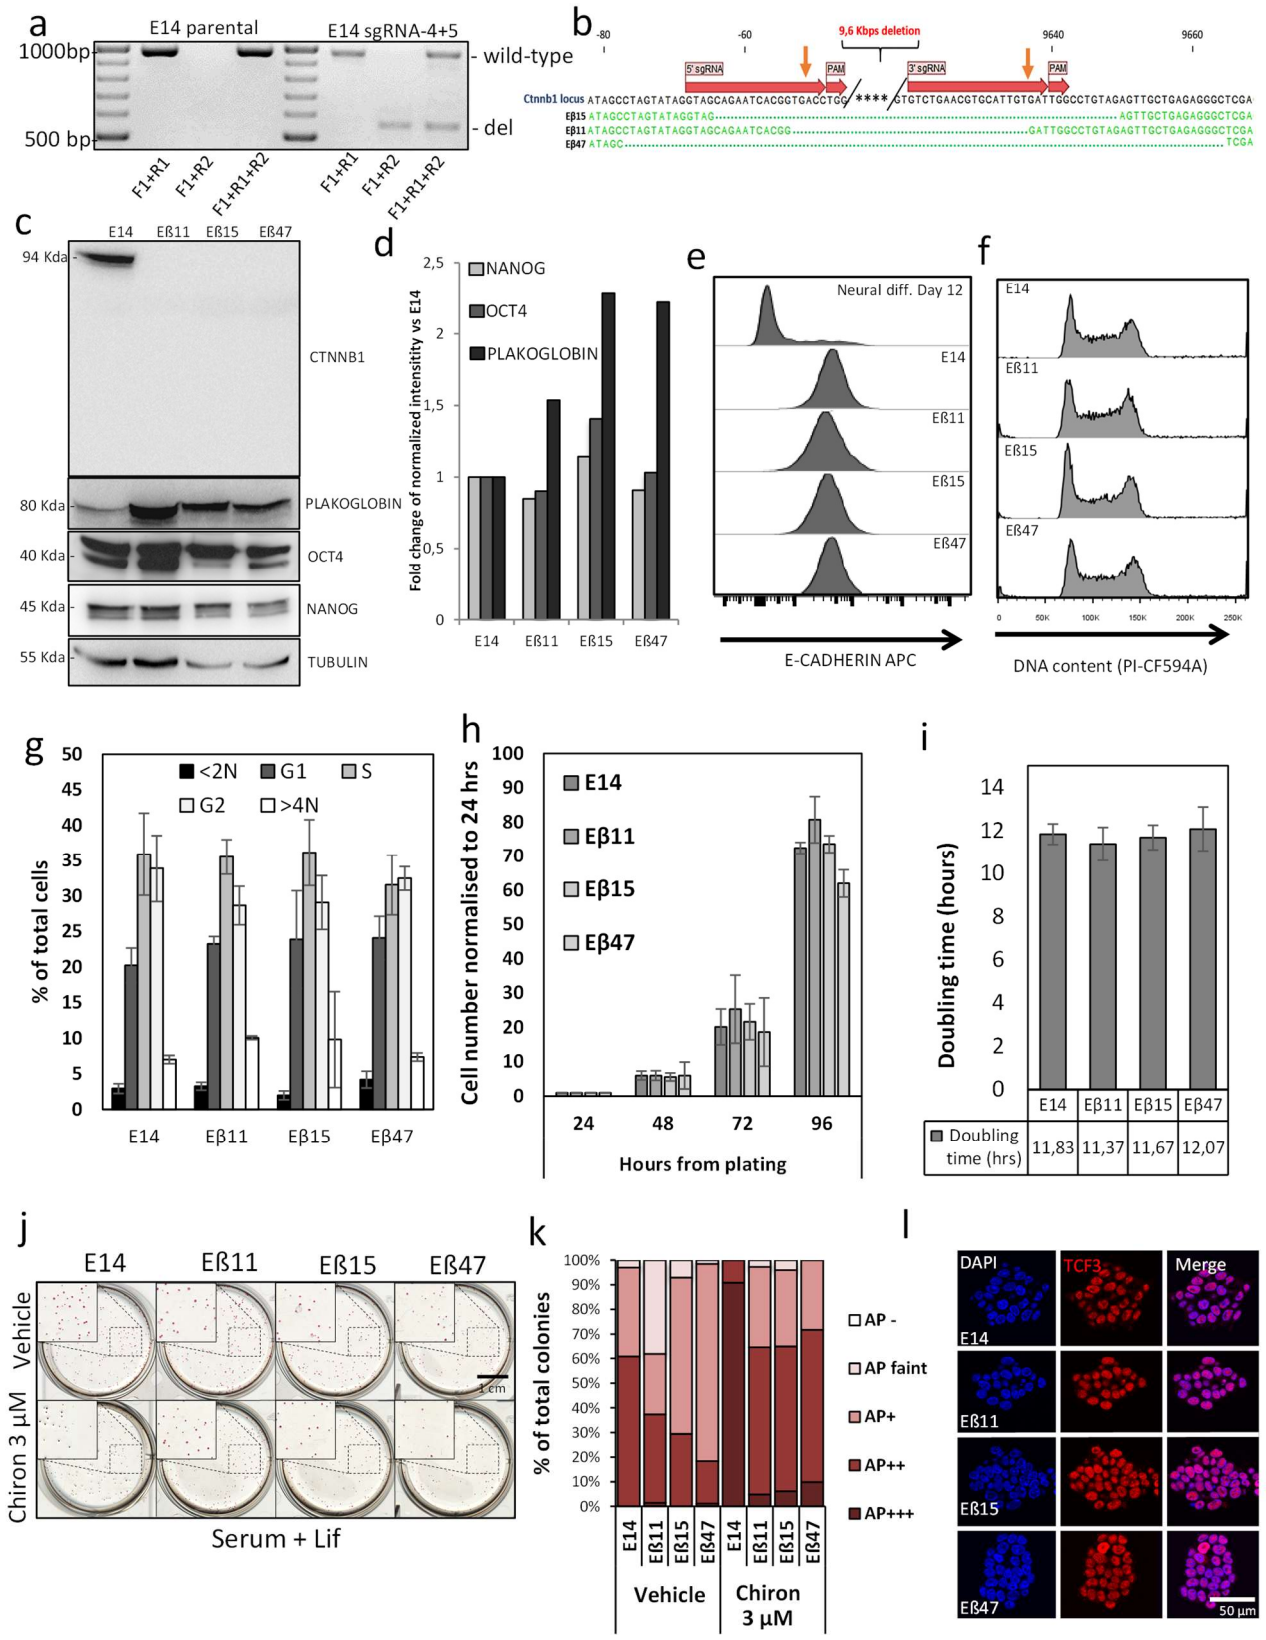

Figure S2

**Figure S2 – Characterization of  $\beta$ -catenin knock-out clones. Related to Figure 2.**

**a)** PCR genotyping of E14 transiently transfected with Cas9, sgRNA4 and sgRNA5 (right) and parental cell line (left). Three different oligos combinations were used to detect wild-type allele (F1+F2), deleted alleles (F1+R2) or both (F1+R1+R2). **b)** Sanger sequencing of E $\beta$ 11, E $\beta$ 15 and E $\beta$ 47 *Ctnnb1* edited locus. Matching bases are represented as green letters, green dots are deleted bases. Orange arrows indicate expected Cas9 editing sites, sgRNAs sequences and PAM are shown as red arrows. **c)** Western blot of total protein extracts from E14, E $\beta$ 11, E $\beta$ 15 and E $\beta$ 47 mESCs. Protein extracts were probed for  $\beta$ -catenin, PLAKOGLOBIN, NANOG and OCT4 expression. TUBULIN was used as loading control. **d)** Band intensity quantification relative to western blot in figure (c). Band intensities were normalized on TUBULIN intensity for each sample and then rescaled as fold-change with respect to the parental cell line. **e)** Flow cytometry analysis of E-CADHERIN expression in E $\beta$ 11, E $\beta$ 15, E $\beta$ 47 and parental E14 cells. E14 cells undergoing neuroectodermal differentiation were used as negative control for E-Cadherin expression (top). **f)** Representative flow-cytometry DNA content histograms in fixed E14, E $\beta$ 11, E $\beta$ 15 and E $\beta$ 47 cells. PI was used to measure DNA content. **g)** Histogram of cell-cycle analysis on flow-cytometry data in (f). Error bars represent standard error of four independent biological replicates. No statistically significant differences were observed using Student's T-test **h)** Growth curve of E14, E $\beta$ 11, E $\beta$ 15 and E $\beta$ 47 cells. Data are cell counts derived from flow-cytometry on living cells. Error bars represent standard deviation of three independent biological replicates. No statistically significant differences were observed using Student's T-test and doubling time analysis; **i)** Average population doubling times of E14, E $\beta$ 11, E $\beta$ 15 and E $\beta$ 47 cells, inferred from growth curve data in (h). Error bars represent standard deviation of three independent biological replicates. No statistically significant differences were observed using Student's T-test. **j)** AP staining of E14, E $\beta$ 11, E $\beta$ 15 and E $\beta$ 47 cells cultured in Serum/LIF in presence of Vehicle (0.3 % DMSO) or 3  $\mu$ M Chiron for 5 days. Whole plate scanning and magnification inset (dashed boxes). Scalebar= 1 cm. **k)** AP staining intensity quantification relative to Figure 2i. **l)** Immunofluorescence of parental E14 cells, E $\beta$ 11, E $\beta$ 15 and E $\beta$ 47 for Tcf3 expression. DAPI was used to counterstain nuclei. Scalebar= 50  $\mu$ m.

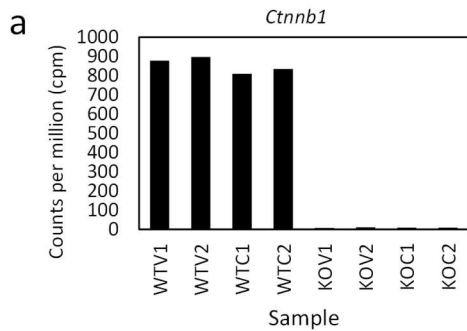

**b**

|         | noFC  | logFC >0.5 | logFC >1 | logFC >2 |    |
|---------|-------|------------|----------|----------|----|
| WTV/WTC | Total | 3134       | 1157     | 316      | 45 |
|         | UP    | 1454       | 476      | 111      | 14 |
| WTC/KOC | Total | 3690       | 1259     | 318      | 47 |
|         | UP    | 1716       | 437      | 98       | 21 |
| WTV/KOV | Total | 1318       | 286      | 51       | 11 |
|         | UP    | 658        | 192      | 30       | 2  |
| KOV/KOC | Total | 1423       | 254      | 44       | 6  |
|         | UP    | 697        | 124      | 19       | 3  |
|         | DOWN  | 726        | 130      | 25       | 3  |

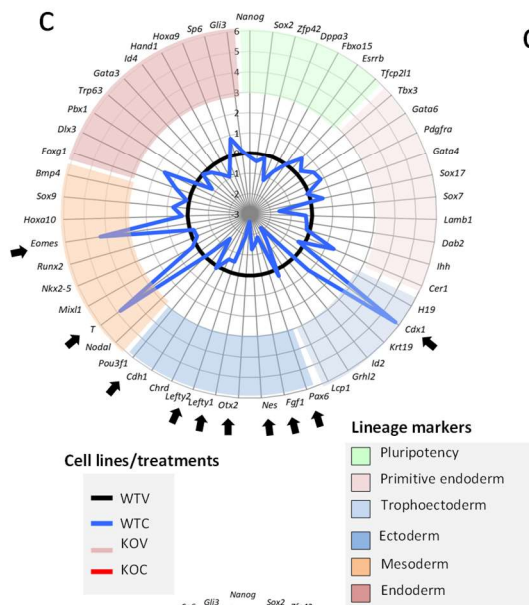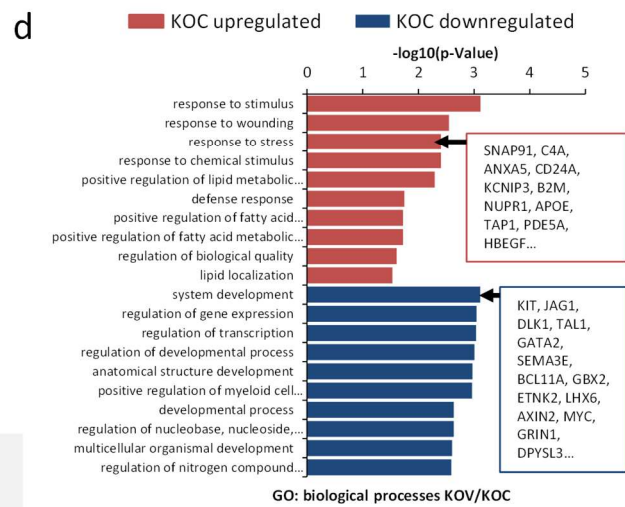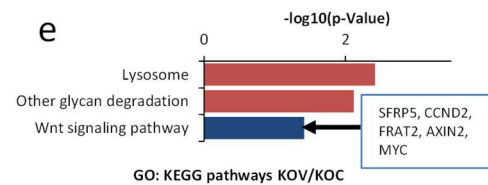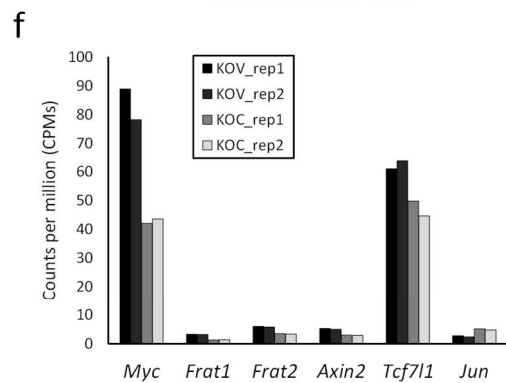

Figure S3

**Figure S3 – RNA-seq analysis of  $\beta$ -catenin depletion and Gsk3 inhibition in mESCs. Related to Figure 3.**

**a)** Histogram of *Ctnnb1* mRNA expression levels (raw counts) across WTV, WTC, KOV and KOC samples, individual replicates are shown. **b)** Number of differentially expressed genes in various comparison relative to Figure 3d. **c)** Radar plot showing the fold-change of pluripotency and lineage marker genes in WTC (top panel, blue line) or KOV, KOC samples (light and dark red lines respectively, bottom panel), versus WTV sample (black line, top and bottom panel). **d,** **e)** Gene ontology analysis of biological processes (d) and KEGG pathways (e) enriched in differentially expressed genes in the KOV/KOC comparison (adjusted -p-value <0.05, absolute logFC >0.5) **f)** Histogram of counts per million (CPMs) of canonical Wnt target genes with minor expression level changes in KOV/KOC comparison. Individual biological replicates are shown.



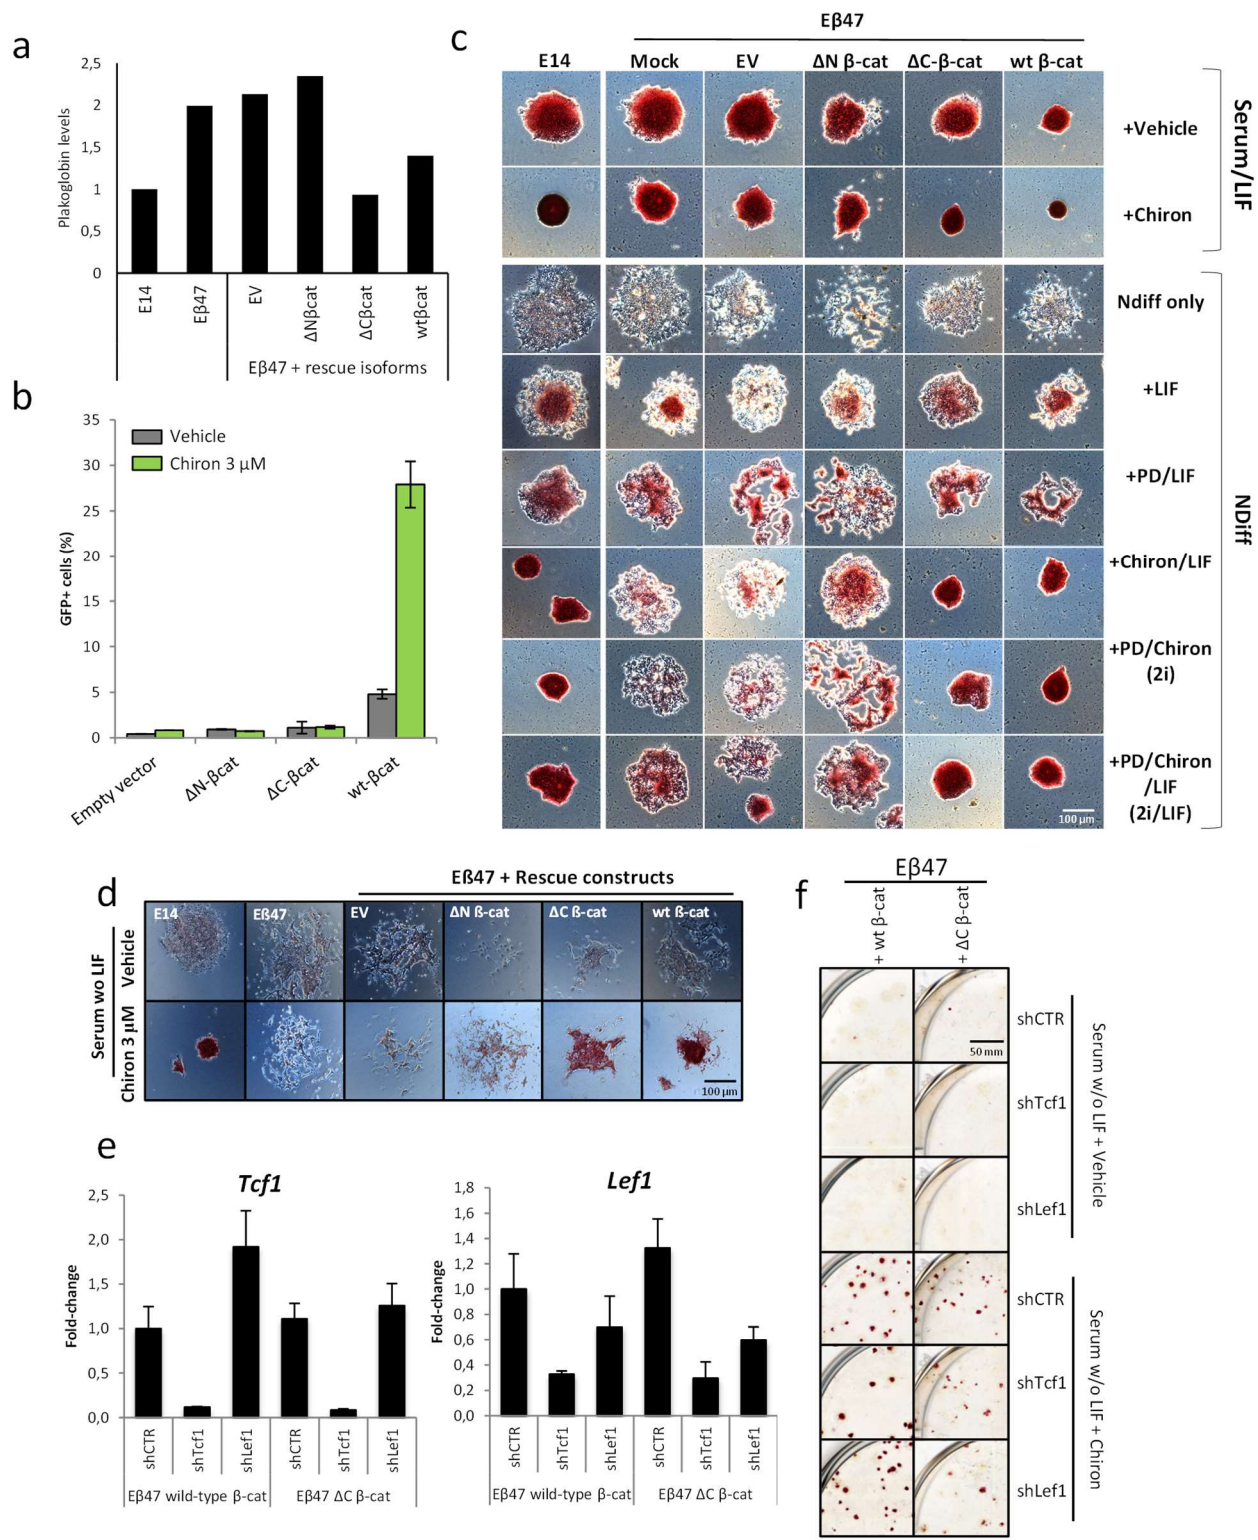

Figure S4

**Figure S4 – Canonical  $\beta$ -catenin functions are required for inhibition of differentiation. Related to Figure 5.**

a) Western blot quantification of PLAKOGLOBIN levels relative to Figure 5c. PLAKOGLOBIN/TUBULIN ratios are represented as fold change with respect to the E14 sample. b) E $\beta$ 47 cells were transduced with either EV,  $\Delta$ N  $\beta$ -cat,  $\Delta$ C  $\beta$ -cat or wt  $\beta$ -cat encoding lentiviruses. Cells were further transduced with the 7TGP Wnt reporter lentivirus and cultured for 48 hours in presence of 3  $\mu$ M Chiron (green bars) or Vehicle (0.3 % DMSO, grey bars). The percentage of eGFP positive cells is represented for each sample. Error bars represents standard error of two technical replicates. c) AP staining of E14 and E $\beta$ 47 cells, and E $\beta$ 47 cells, transduced with rescue  $\beta$ -catenin isoforms encoding lentiviruses and cultured for 1 week in the indicated media. Scalebar= 100  $\mu$ m. d) Exemplificative phase contrast pictures relative to Figure 5f. Scalebar = 100  $\mu$ m. e) qRT-PCR of *Tcf1* and *Lef1* levels in E $\beta$ 47 cells rescued with either wt  $\beta$ cat or  $\Delta$ C  $\beta$ -cat plasmids and transduced with lentivirus encoding short hairpin against *Tcf1* or *Lef1*. Error bars represents standard errors of technical triplicates. f) AP staining exemplificative pictures relative to Figure 5g. Scalebar= 50  $\mu$ m.

## Supplemental Tables

**Table S1 - Differentially expressed genes across pairwise comparisons**

**Table S2 - WTV\_KOV Gene ontology summary**

**Table S3 - KOV\_KOC Gene ontology summary**

**Table S4 - WTV\_WTC Gene ontology summary**

**Table S5 - KOC\_WTC Gene ontology summary**

**Table S6 – List of oligonucleotides, antibodies and PCR genotyping assays**

## Supplemental experimental procedures

### qRT-PCR

RNA was extracted and purified using with Maxwell LEV semi-automated RNA extraction kit (Promega) following manufacturer instructions. The cDNA was produced with iScript cDNA synthesis kit (BioRad). Real-time quantitative PCR reactions from 8,3 ng of cDNA were set up in triplicate using a LightCycler DNA SYBR Green I Master PCR machine (Roche). The oligonucleotides used in qRT-PCR experiments are provided in **Table S6**.

### Western blot, immunofluorescence, flow-cytometry and alkaline phosphatase staining

For western blot experiments cells were harvested and washed twice with PBS. Cell lysis was performed on ice for 25 min, in RIPA buffer (150 mM NaCl, 1% Nonidet P40, 0.5% sodium deoxycholate, 0.1% sodium dodecyl sulphate, 50 mM Tris-HCl, pH 8.0) containing a protease inhibitory cocktail (Roche). Insoluble material was pelleted by centrifugation at 16,000×g for 3 min at 4°C. Protein concentrations were determined using the Bradford assay (Bio-Rad). Thirty micrograms extract was mixed with 4× sample buffer (40% glycerol, 240 mM Tris/HCl, pH 6.8, 8% SDS, 0.04% bromophenol blue, 5% β-mercaptoethanol), denatured at 96°C for 5 minutes, separated by SDS-PAGE, and transferred to nitrocellulose membranes (PROTRAN-Whatman, Schleicher&Schuell). The membranes were blocked with 5% non-fat dry milk in TBS-T for 60 min, incubated with primary antibodies overnight at 4°C, washed three times with TBS-T for 10 min, incubated with the peroxidase-conjugated secondary antibody (1:2000; Amersham Biosciences) in TBST with 5% non-fat dry milk for 60 min, and washed three times with TBST for 10 min. Immunoreactive proteins were detected using Supersignal West Dura HRP Detection kits (Pierce). A list of the primary antibodies is provided in **Table S6**.

For flow-cytometry analysis, cells were trypsinised, washed once in PBS, resuspended in PBS with 5% FBS + 4',6-diamidino-2-phenylindole (DAPI) and analysed on BD Fortessa cytometer. For E-cadherin staining, incubation with the PE conjugated antibody was performed after the first wash. Neuronally differentiated mESCs were used as negative staining control.

For immunofluorescence, mESCs were fixed with 4% paraformaldehyde for 20 min at room temperature, and then washed twice with PBS following incubation in blocking solution containing 10% goat serum or 3% Bovine Serum Albumin (Sigma) and 0.1% Triton X-100 (Sigma) for 1 h at room temperature. The cells were then left overnight at 4 °C in blocking solution containing the primary antibody. The next day, the cells were washed three times with PBS and then incubated with the secondary antibody for 1 h at room temperature in PBS. The primary antibodies used are provided in **Table S6**. Goat anti-mouse IgG, goat anti-rabbit IgG, (1:1000, Life Technologies) conjugated to Alexa Fluor-488 or Alexa Fluor-594 were used as secondary antibodies. Nuclear staining was performed with DAPI (Life Technologies). For multichannel fluorescence intensity plots in **Figure 1E**, the BAR plugin from FIJI on multi-channel composite images was used. Fluorescence intensities were measured across a section line of equal length as in (Lyashenko et al., 2011).

For AP staining, 600 cells per well were seeded on gelatin coated 6-well plates; fresh medium was added every two days. When distinguishable colonies were formed (usually 5 to 7 days after seeding) cells were washed twice with PBS fixed in 10% Neutral Formalin Buffer for 15 min at 4°C, and washed three times with distilled water. Fixed cells were then incubated for 45 min at room temperature in 2ml/well of the staining solution prepared as follows: 0,005g Naphthol AS MX-PO4 (Sigma, N5000), 0,03g Red Violet LB salt (Sigma, F1625), 200 µl N,N-Dimethylformamide (DMF, Fischer Scientific, D1191), 25 ml of Tris-HCl (MW=157.6, pH 8.3, 0.2M), and 25 ml of distilled water. Finally, the staining

solution was removed, and cells were overlaid with 2 ml PBS and imaged using phase contrast and widefield microscopy. Whole plate scanning images were acquired through a high-resolution scanner. AP staining intensity was manually scored as previously described (Wray et al., 2011) using phase contrast microscopy.

### **Constructs**

sgRNAs were cloned by annealed oligos cloning into px459-SpCas9-Puro (Addgene # 48138) as previously described (De Jaime-Soguero et al., 2017), oligonucleotides used for generating Ctnnb1 targeting vectors are listed in **Table S6**. pSpCas9(BB)-2A-Puro (PX459) was a gift from Dr Feng Zhang (Ran et al., 2013). Lentiviral vectors expressing wt or truncated  $\beta$ -catenin isoforms (pL-EF1a-Puro) were generated by Gibson assembly. pL-EF1a-Puro backbone was amplified by PCR from 7TGP vector (Addgene#24305) while hEF1a promoter was amplified from p1494 EF1a Ires Hygro vector (Aulicino et al., 2014). Wt  $\beta$ -cat CDS was amplified from mESCs cDNA using Superscript III first-strand cDNA synthesis kit. Mutant  $\beta$ -catenin CDSs were generated by PCR on the wild-type product. Sequences for pL-EF1a Puro based vectors expressing wt and mutant  $\beta$ -catenin isoforms are provided in **Supplemental DNA sequences**. 7TGP was a gift from Dr Roel Nusse (Fuierer and Nusse, 2010). Short-hairpins RNAs were cloned in pLKO Hygro as previously described (Aulicino et al., 2014). Oligonucleotides sequences for short-hairpin cloning are provided in **Table S6**. pLKO.1 hygro was a gift from Bob Weinberg (Addgene plasmid # 24150). The maps and the full-length sequences of all the constructs generated in this study are provided in **Supplemental DNA sequences**.

List of top oligonucleotides used for cloning sgRNAs into px459-spCas9-Puro digested with BbsI.

## Supplemental DNA sequences

### Sanger sequencing – related to Figure S2B

Forward sequencing oligo (5'-3'): CACCGTATGCCTACAATCTGTTTCTA

Reverse sequencing oligo (5'-3'): CTACACAATGTTACACGTCTCCAGAT

#### >Eβ11-Forward

NNNNNNNNCTTCTGACCCGTGGCTGCTGTGTATTTTTAGTGTATGCCATGGTGAACCTGGCTTTTGGTGTG  
GGGGCACATAGCCTAGTATAGGTAGAGTTGCTGAGAGGGCTCGAGGGGTGGGCTGGTATCTCAGAAAAGT  
GCCTGACACACTAACCAAGCTGAGTTTCTATGGGAACAGTCGAAGTACGCTTTTTGTTCTGGTCCTTTTT  
GGTTCGAGGAGTAACAATACAAATGGATTTGGGGAGTGACTCACGCAGTGAAGAATGCACACGAATGGAT  
CACAAGATGGCGTTATCAAACCCTAGCCTTGCTTGTCTTTGTTTTAATATCTGTAGTGGTGTGACTTTGC  
TTGCTTTTATTTTTGCAGTAACTGTTAGTTTTTAAGTAGTGTATGTTCTAGTGAACCTGCTACAGCAATT  
TCTGATTTCTAAGAACCGAGTAATGGTGTAGAACACTAATTCATAATCACGCTAATTGTAATCTGGAGAC  
GTGTACAATTGTGTAGANNNA

#### >Eβ11-Reverse

TATAGCGTGATTTGATTCGTGTTCTACACCATTTACTCCGGTTTCTTAGAAAATCAGAAAATTTGCTGTAGCA  
GGTTCACTAGAACATAACACTACTTAAAACTAACAGTTACTGCAAAAAATAAAAAGCAAGCAAAGTCAG  
CACCCTACAGATATTAACAACAAGAACAAGCAAGGCTAGGGTTTGATAACGCCATCTTGTGATCCATTC  
GTGTGCATTCTTCACTGCGTGAGTCACTCCCCAAATCCATTTGTATTGTTACTCCTCGACCAAAAAGGACC  
AGAACAAAAAGCGTACTTCGACTGTTCCCATAGGAACTCAGCTTGGTTAGTGTGTCAGGCACTTTCTGA  
GATACCAGCCCACCCCTCGAGCCCTCTCAGCAACTCTACCTATACTAGGCTATGTGCCCGACACCAAAA  
GCCAGTTCACCATGGCATACTAATAACACAGCAGCCACGGTGTGAGGAAGCTCTTCTCAGTAGAAA  
CAGATTGTAGGCATAACGGTGA

#### >Eβ15 Forward

CCCGNNANNNNNNNNGNCNNGTGGCTTGCNGTGTATTTNAGTTGTATGCCATGGTGAACCTGGCTTTTGG  
TGTCGGGGCACATAGCCTAGTATAGGTAGCAGAATCACGGGATTGGCCTGTAGAGTTGCTGAGAGGGCTC  
GAGGGGTGGGCTGGTATCTCAGAAAAGTGCCTGACACACTAACCAAGCTGAGTTTCTATGGGAACAGTCG  
AAGTACGCTTTTTGTTCTGGTCCTTTTTGGTCGAGGAGTAACAATACAAATGGATTTGGGGAGTGACTCAC  
GCAGTGAAGAATGCACACGAATGGATCACAAGATGGCGTTATCAAACCCTAGCCTTGCTTGTCTTTGTTT  
TAATATCTGTAGTGGTGTGACTTTGCTTGTCTTTATTTTTGCAGTAACTGTTAGTTTTTAAGTAGTGTTA  
TGTTCTAGTGAACCTGCTACAGCAATTTCTGATTTCTAAGAACCGAGTAATGGTGTAGAACACTAATTCAT  
AATCACGCTAATTGTAATCTGGAGACGTGTACAATTTGTGTAGANNNA

#### >Eβ15-Reverse

NNNNNNNNNGTGNNTGANNNGTNGTNCTACACCATTTACTCCGGTTNCTTAGAAAATCAGAAAATNGCTG  
TAGCAGGTTCACTAGAACATAACACTACTTAAAACTAACAGTTACTGCAAAAAATAAAAAGCAAGCAAA  
GTCAGCACCCTACAGATATTAACAACAAGAACAAGCAAGGCTAGGGTTTGATAACGCCATCTTGTGATC  
CATTCTGTGCATTCTTCACTGCGTGAGTCACTCCCCAAATCCATTTGTATTGTTACTCCTCGACCAAAA  
GGACCAGAACAAAAAGCGTACTTCGACTGTTCCCATAGGAACTCAGCTTGGTTAGTGTGTCAGGCACTT  
TCTGAGATACCAGCCCACCCCTCGAGCCCTCTCAGCAACTCTACAGGCCAATCCCGTGATTCTGCTACCTA  
TACTAGGCTATGTGCCCGACACCAAAAAGCCAGTTCACCATGGCATACTAATAACACAGCAGCCAC  
GGTGTGAGGAAGCTCTTCTCAGTAGAAAACAGATTGTAGCCNTTACGGGTGANNA

#### >Eβ47-Forward

NNNGNNNNNCTNCTGACCNGTGGCTGCTGTGTATTTTTAGTGTATGCCATGGTGAACCTGGCTTTTGGTGT  
CGGGGCACATAGCTCGAGGGGTGGGCTGGTATCTCAGAAAAGTGCCTGACACACTAACCAAGCTGAGTTT  
CTATGGGAACAGTCGAAGTACGCTTTTTGTTCTGGTCCTTTTTGGTTCGAGGAGTAACAATACAAATGGAT  
TGGGGAGTGACTCACGCAGTGAAGAATGCACACGAATGGATCACAAGATGGCGTTATCAAACCCTAGCC  
TTGCTTGTCTTTGTTTTAATATCTGTAGTGGTGTGACTTTGCTTGTCTTTATTTTTGCAGTAACTGTTAG  
TTTTTAAGTAGTGTATGTTCTAGTGAACCTGCTACAGCAATTTCTGATTTCTAAGAACCGAGTAATGGT  
TAGAACACTAATTCATAATCACGCTAATTGTAATCTGGAGACGTGTACATTNGTGTAGANNNA

#### >Eβ47-Reverse

NNTNNNNCGTGATTATGATTAGTGTCTACACCATTACTCGGTTCTTAGAAATCAGAAATTGCTGTAGCAG  
 GTTCACTAGAACATAACACTACTTAAAACTAACAGTTACTGCAAAAAATAAAAGCAAGCAAAGTCAGC  
 ACCACTACAGATATTAACAACAAGAACAAGCAAGGCTAGGGTTTGATAACGCCATCTTGTGATCCATTCCG  
 TGTGCATTCTTCACTGCGTGAGTCACTCCCAAAATCCATTTGTATTGTTACTCCTCGACCAAAAAGGACCA  
 GAACAAAAAGCGTACTTCGACTGTTCCCATAGGAACTCAGCTTGGTTAGTGTGTCAGGCACTTTCTGAG  
 ATACCAGCCCACCCCTCGAGCTATGTGCCCCGACACCAAAAAGCCAGTTCACCATGGCATACTAAAAAT  
 ACACAGCAGCCACGGTGTGAGGAAGCTCTTCTCAGTAGAAACAGATTGTAGCCNTNACCGGTGANNA

**Plasmid maps and sequences**

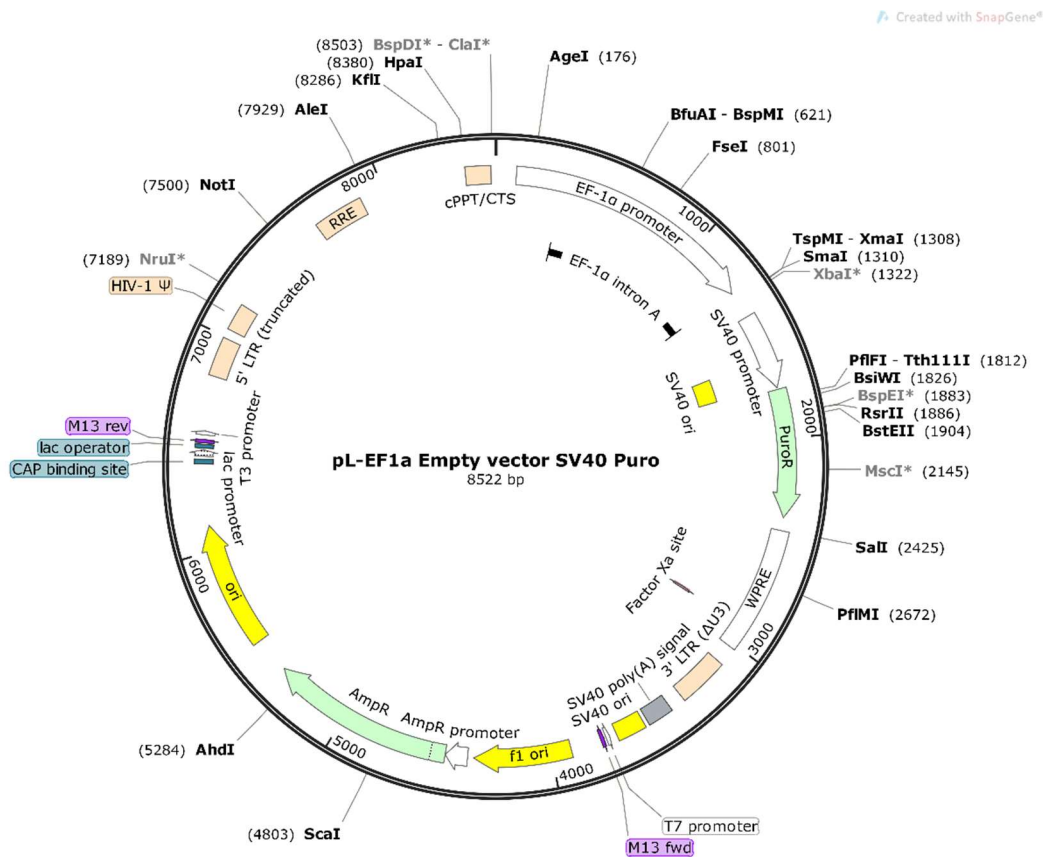

**>pL-EF1a empty vector SV40 Puro**

CTAGCCCCGATAAGCTTTGCAAAGATGGATAAAAGTTTTAAACAGAGAGGAATCTTTGCAGCTAATGGACC  
 TTCTAGGTCTTGAAAGGAGTGGAATTGGCTCCGGTGCCCGTCAGTGGGCAGAGCGCACATCGCCACAG  
 TCCCCGAGAAGTTGGGGGAGGGGTTCGGCAATTGAACCGGTGCCTAGAGAAGGTGGCGCGGGGTAAACT  
 GGGAAAGTGATGTCGTGACTGGCTCCGCCTTTTTCCCGAGGGTGGGGGAGAACCCTATATAAGTGCAGT  
 AGTCGCCGTGAACGTTCTTTTTCGCAACGGGTTTGCCGCCAGAACACAGGTAAGTGCCGTGTGTGGTTCCC  
 GCGGGCCTGGCCTCTTACGGGTTATGGCCCTGCGTGCCTTGAATTACTTCCACTGGCTGCAGTACGTGA  
 TTCTTGATCCCGAGCTTCGGGTTGGAAGTGGGTGGGAGAGTTCGAGGCCTTGCCTTAAGGAGCCCCTTC  
 GCCTCGTGCTTGAGTTGAGGCCTGGCCTGGGCGCTGGGGCCCGCGTGCGAATCTGGTGGCACCTTCGC  
 GCCTGTCTCGCTGCTTTCGATAAGTCTCTAGCCATTTAAAATTTTTGATGACCTGCTGCGACGCTTTTTTTC  
 TGGCAAGATAGTCTTGTAATGCGGGCCAAGATCTGCACACTGGTATTTTCGGTTTTTGGGGCCGCGGGCG  
 GCGACGGGGCCCGTGCGTCCCAGCGCACATGTTTCGGCGAGGCGGGGCCTGCGAGCGCGGCCACCGAGAA  
 TCGGACGGGGGTAGTCTCAAGCTGGCCGGCCTGCTCTGGTGCCTGGCCTCGCGCCCGCTGTATCGCCCC  
 GCCCTGGGCGGCAAGGCTGGCCCCGTCGGCACCAAGTTGCGTGAGCGGAAAGATGGCCGCTTCCCGGCCCT  
 GCTGCAGGGAGCTCAAAATGGAGGACGCGGCGCTCGGGAGAGCGGGCGGGTGAGTCACCACACAAAG  
 GAAAAGGGCCTTCCGTCCTCAGCCGTCGCTTCATGTGACTCCACGGAGTACCGGGCGCCGTCCAGGCAC  
 CTCGATTAGTTCTCGAGCTTTTGGAGTACGTCGTCTTAGGTTGGGGGAGGGGTTTTATGCGATGGAGTT  
 TCCCCACACTGAGTGGGTGGAGACTGAAGTTAGGCCAGCTTGGCACTTGATGTAATTCTCCTTGAATTTG

CCCTTTTTGAGTTTGGATCTTGGTTCATTCTCAAGCCTCAGACAGTGGTTCAAAGTTTTTTTTCTTCCATTTCC  
AGGTGTCGTGAGGAATTCTGCAGTCGATCGACGGTACCGCGGGCCCCGGGGCTCGAGATCTAGAGTCGAG  
AAGCTTGATGATCTGCGCAGCACCATGGCCTGAAATAACCTCTGAAAGAGGAACTTGGTTAGGTACCTTC  
TGAGGCGGAAAGAACCAGCTGTGGAATGTGTGTGTCAGTTAGGGTGTGGAAAGTCCCCAGGCTCCCCAGCA  
GGCAGAAGTATGCAAAGCATGCATCTCAATTAGTCAGCAACCAGGTGTGGAAAGTCCCCAGGCTCCCCAG  
CAGGCAGAAGTATGCAAAGCATGCATCTCAATTAGTCAGCAACCATAGTCCCGCCCCTAACTCCGCCCAT  
CCCGCCCCTAACTCCGCCAGTTCGCCCATTTCTCCGCCCATGGCTGACTAATTTTTTTTTATTTATGCAGA  
GGCCGAGGCCGCTCGGCCTCTGAGCTATTCCAGAAGTAGTGAGGAGGCTTTTTTGGAGGCCTAGGCTTT  
TGCAAAAAGCTTACCATGACCGAGTACAAGCCACGGTGCCTCGCCACCCGCGACGACGTCCCCAGGG  
CCGTACGCACCCTCGCCGCCGCTTCGCCGACTACCCCGCCACGCGCCACACCGTCGATCCGGACCGCCA  
CATCGAGCGGGTCACCGAGCTGCAAGAACTCTTCCACGCGCGTTCGGGCTCGACATCGGCAAGGTGTGG  
GTCGCGGACGACGGCGCCGCGGTGGCGGTCTGGACCACGCCGGAGAGCGTCAAGCGGGGGCGGTGTTCC  
GCCGAGATCGGCCCGCGCATGGCCGAGTTGAGCGGTTCCCGGCTGGCCGCGCAGCAACAGATGGAAGGC  
CTCCTGGCGCCGCACCGGCCAAGGAGCCCGCGTGGTTCCTGGCCACCGTCGGCGTCTCGCCGACCACC  
AGGGCAAGGGTCTGGGCAGCGCCGTCGTGCTCCCGGAGTGGAGGCGGCCGAGCGCGCCGGGGTGCCTCG  
CCTTCCCTGGAGACCTCCGCGCCCCGCAACCTCCCCTTCTACGAGCGGCTCGGCTTACCGTCACCGCCGAC  
GTCGAGTCCCCGAAGGACCGCGCGACCTGGTGCATGACCCGCAAGCCCGGTGCCTGACGCCCGCCCCACG  
ACCCGACGCGCCCCACCGAAAGGAGCGCACGACCCCATGCCAGTCGACAATCAACCTCTGGATTACAAA  
ATTTGTGAAAGATTGACTGGTATTCTTAACATATGTTGCTCCTTTTACGCTATGTGGATACGCTGCTTTAATG  
CCTTTGTATCATGCTATTGCTTCCCGTATGGCTTTCATTTTCTCCTCCTTGTATAAATCCTGGTTGCTGTCTC  
TTTATGAGGAGTTGTGGCCCGTTGTTCAGGCAACGTGGCGTGGTGTGCACTGTGTTTGTGACGCAACCCCC  
ACTGGTTGGGGCATTGCCACCACCTGTCAGTCTCCTTTCCGGGACTTTCCGCTTTCCCCCTCCCTATTGCCACG  
GCGGAACTCATCGCCGCTGCCTTGCCCGCTGCTGGACAGGGGCTCGGCTGTTGGGCACTGACAATTCCG  
TGGTGTGTCGGGGAAGCTGACGTCTTTCCATGGCTGCTCGCCTGTGTTGCCACCTGGATTCTGCGCGGG  
ACGTCTTCTGCTACGTCCCTTCGGCCCTCAATCCAGCGGACCTTCCCTTCCCGCGGCCCTGCTGCCGGCTCT  
GCGGCCCTTCCCGCTCTTCGCCTTCGCCCTCAGACGAGTCGGATCTCCCTTTGGGCGCCCTCCCCGCCTG  
GAATTCGAGCTCGGTACCTTTAAGACCAATGACTTACAAGGCAGCTGTAGATCTTAGCCACTTTTTAAAA  
GAAAAGGGGGGACTGGAAGGGCTAATCACTCCAACGAAGACAAGATCTGCTTTTTGCTTGTACTGGGT  
CTCTCTGGTTAGACCAGATCTGAGCCTGGGAGCTCTCTGGCTAACTAGGGAACCCACTGCTTAAGCCTCA  
ATAAAGCTTGCCTTGAGTGTTCAGTAGTGTGTGCCCGTCTGTTGTGTGACTCTGGTAACTAGAGATCCC  
TCAGACCCTTTTAGTCAGTGTGGAAAATCTCTAGCAGTAGTAGTTCATGTCATCTTATTATTAGTATTTAT  
AAGCAATAGCATCACAATTTTACAATAAAGCATTTTTTTTTACTGCATTCTAGTTGTGGTTTGTCCAAAC  
TCATCAATGTATCTTATCATGTCTGGCTCTAGCTATCCCGCCCCTAACTCCGCCAGTTCGCCCCATTCTCC  
GCCCCATGGCTGACTAATTTTTTTTTATTTATGCAGAGGCCGAGGCCGCCTCGGCCTCTGAGCTATTCCAGA  
AGTAGTGAGGAGGCTTTTTTGGAGGCCTAGGCTTTTGCCTCGAGACGTACCCAATTCGCCCTATAGTGAGT  
CGTATTACGCGCGCTCACTGGCCGTCGTTTTACAACGTCGTGACTGGGAAAACCCTGGCGTTACCCAATT  
AATCGCCTTGCAGCACATCCCCCTTTCGCCAGCTGGCGTAATAGCGAAGAGGCCCGCACCGATCGCCCTT  
CCCAACAGTTGCGCAGCCTGAATGGCGAATGGCGCGACGCGCCCTGTAGCGGCGCATTAAGCGCGGCGG  
GTGTGGTGGTTACGCGCAGCGTGACCGCTACACTTGCCAGCGCCCTAGCGCCCCTCCTTTTCGCTTTCTTC  
CCTTCTTTCTCGCCACGTTTCGCCGGCTTTCCCCGTCAAGCTCTAAATCGGGGGCTCCCTTTAGGGTTCCGA  
TTTAGTGCTTTACGGCACCTCGACCCCAAAAAACTTGATTAGGGTGTAGGTTACGTAAGTGGGCCATCGCC  
CTGATAGACGGTTTTTTCGCCCTTTGACGTTGGAGTCCACGTTCTTTAATAGTGACTCTTGTTCCAAACTG  
GAACAACACTCAACCCTATCTCGGTCTATTCTTTGATTTATAAGGGATTTTGGCGATTTCCGCCCTATTGGT  
TAAAAAATGAGCTGATTTAACAAAAATTTAACGCGAATTTTAAACAAAATATTAACGTTTACAATTTCCCA  
GGTGGCACTTTTTCGGGGAATGTGCGCGGAACCCCTATTTGTTTATTTTTCTAAATACATTCAAATATGTA  
TCCGCTCATGAGACAATAACCCTGATAAATGCTTCAATAATATTGAAAAAGGAAGAGTATGAGTATTCAA  
CATTTCCGTGTCGCCCTTATTCCCTTTTTTTCGGCATTTCGCTTCTGTTTTTGTCTACCCAGAAACGCTG  
GTGAAAGTAAAAGATGCTGAAGATCAGTTGGGTGCACGAGTGGGTTACATCGAACTGGATCTCAACAGC  
GGTAAGATCCTTGAGAGTTTTTCGCCCGAAGAACGTTTTTCCAATGATGAGCACTTTTAAAGTTCTGCTATG  
TGCGCGGTATTATCCCGTATTGACGCCGGGCAAGAGCAACTCGGTCGCCGCATACACTATTCTCAGAAT  
GACTTGGTTGAGTACTACCAGTCACAGAAAAGCATCTTACGGATGGCATGACAGTAAGAGAATTATGCA  
GTGCTGCCATAACCATGAGTGATAACACTGCGGCCAACTTACTTCTGACAACGATCGGAGGACCGAAGGA  
GCTAACCGCTTTTTTGCACAACATGGGGGATCATGTAACCTCGCCTTGATCGTTGGGAACCGGAGCTGAAT  
GAAGCCATACCAAACGACGAGCGTGACACCACGATGCCTGTAGCAATGGCAACAACGTTGCGCAAACTA  
TTAACTGGCGAACTACTTACTCTAGCTTCCCGGCAACAATTAATAGACTGGATGGAGGCGGATAAAGTTG  
CAGGACCACTTCTGCGCTCGGCCCTTCCGGCTGGCTGGTTTATTGCTGATAAATCTGGAGCCGGTGAGCGT

GGGTCTCGCGGTATCATTGCAGCACTGGGGCCAGATGGTAAGCCCTCCCGTATCGTAGTTATCTACACGA  
CGGGGAGTCAGGCAACTATGGATGAACGAAATAGACAGATCGCTGAGATAGGTGCCTCACTGATTAAGC  
ATTGGTAACTGTCAGACCAAGTTTACTCATATATACTTTAGATTGATTTAAAACCTCATTTTTTAATTTAAAA  
GGATCTAGGTGAAGATCCTTTTTGATAATCTCATGACCAAATCCCTTAACGTGAGTTTTTCGTTCCACTGA  
GCGTCAGACCCCGTAGAAAAGATCAAAGGATCTTCTTGAGATCCTTTTTTTCTGCGCGTAATCTGCTGCTT  
GCAAACAAAAAAACCACCGCTACCAGCGGTGGTTTTGTTTGC CGGATCAAGAGCTACCAACTCTTTTTCCG  
AAGGTA ACTGGCTTCAGCAGAGCGCAGATACCAAATACTGTCCTTCTAGTGTAGCCGTAGTTAGGCCACC  
ACTTCAAGAACTCTGTAGCACCGCCTACATACTCGCTCTGCTAATCCTGTTACCAGTGGCTGCTGCCAGT  
GGCGATAAGTCGTGTCTTACCGGGTTGGACTCAAGACGATAGTTACCGGATAAAGGCGCAGCGGTGCGGGCT  
GAACGGGGGGTTCGTGCACACAGCCAGCTTGGAGCGAACGACCTACACCGAACTGAGATACCTACAGC  
GTGAGCTATGAGAAAGCGCCACGCTTCCCGAAGGGAGAAAGGCGGACAGGTATCCGGTAAGCGGCAGGG  
TCGGAACAGGAGAGCGCACGAGGGAGCTTCCAGGGGGAAACGCCTGGTATCTTTATAGTCTGTGCGGGTT  
TCGCCACCTCTGACTTGAGCGTCGATTTTTGTGATGCTCGTCAGGGGGGCGGAGCCTATGGAAAAACGCC  
AGCAACGCGGCCTTTTTACGGTTCCTGGCCTTTTGTGCTGCTGCTCACATGTTCTTTCTGCGTTATCC  
CCTGATTCTGTGGATAACCGTATTACCGCCTTTGAGTGAGCTGATACCGCTCGCCGACCCGAACGACCG  
AGCGCAGCGAGTCAGTGAGCGAGGAAGCGGAAGAGCGCCCAATACGCAAACCGCCTCTCCCCGCGCGTT  
GGCCGATTCATTAATGCAGCTGGCACGACAGGTTTCCCGACTGGAAAGCGGGCAGTGAGCGCAACGCAA  
TTAATGTGAGTTAGCTCACTCATTAGGCACCCCAGGCTTTACACTTTATGCTTCCGGCTCGTATGTTGTGTG  
GAATTGTGAGCGGATAACAATTTACACAGGAAACAGCTATGACCATGATTACGCCAAGCGCGCAATTA  
CCCTCACTAAAGGGAACAAAAGCTGGAGCTGCAAGCTTAATGTAGTCTTATGCAATACTCTTGTAGTCTT  
GCAACATGGTAACGATGAGTTAGCAACATGCCTTACAAGGAGAGAAAAAGCACCGTGCATGCCGATTGG  
TGGAAGTAAGGTGGTACGATCGTGCCTTATTAGGAAGGCAACAGACGGGTCTGACATGGATTGGACGAA  
CCACTGAATTGCCGATTGCAGAGATATTGTATTTAAGTGCCTAGCTCGATACAATAAACGGGTCTCTCTG  
GTTAGACCAGATCTGAGCCTGGGAGCTCTCTGGCTAACTAGGGAACCCACTGCTTAAGCCTCAATAAAGC  
TTGCCTTGAGTGCTTCAAGTAGTGTGTGCCCGTCTGTTGTGTGACTCTGGTAACTAGAGATCCCTCAGACC  
CTTTTAGTCAGTGTGGAAAATCTCTAGCAGTGGCGCCCGAACAGGGACCTGAAAGCGAAAGGGAAACCA  
GAGCTCTCTCGACGCAGGACTCGGCTTGCTGAAGCGCGCACGGCAAGAGGCGAGGGGCGGGCGACTGGTG  
AGTACGCCAAAAATTTGACTAGCGGAGGCTAGAAGGAGAGAGATGGGTGCGAGAGCGTCAGTATTAAG  
CGGGGGAGAATTAGATCGCGATGGGAAAAAATTCGGTTAAGGCCAGGGGGAAAGAAAAAATATAAATTA  
AAACATATAGTATGGGCAAGCAGGGAGCTAGAACGATTTCGCAGTTAATCCTGGCCTGTTAGAAACATCAG  
AAGGCTGTAGACAAATACTGGGACAGCTACAACCATCCCTTCAGACAGGATCAGAAGA ACTTAGATCATT  
ATATAACAGTAGCAACCTCTATTGTGTGCATCAAAGGATAGAGATAAAAGACACCAAGGAAGCTTTA  
GACAAGATAGAGGAAGAGCAAAAACAAAAGTAAGACCACCGCACAGCAAGCGGCCGCTGATCTTCAGACC  
TGGAGGAGGAGATATGAGGGACAATTGGAGAAGTGAATTATATAAATATAAAGTAGTAAAAAATTGAACC  
ATTAGGAGTAGCACCCACCAAGGCAAAGAGAAGAGTGGTGCAGAGAGAAAAAAGAGCAGTGGGAATAG  
GAGCTTTGTTCTTGGGTTCTTGGGAGCAGCAGGAAGCACTATGGGCGCAGCCTCAATGACGCTGACGGT  
ACAGGCCAGACAATTATTGTCTGGTATAGTGCAGCAGCAGAACAATTTGCTGAGGGCTATTGAGGGCGCAA  
CAGCATCTGTTGCAACTCACAGTCTGGGGCATCAAGCAGCTCCAGGCAAGAATCCTGGCTGTGGAAAGAT  
ACCTAAAGGATCAACAGCTCCTGGGGATTTGGGGTTGCTCTGGAAAACCTATTTGCACCACTGCTGTGCCT  
TGGAATGCTAGTTGGAGTAATAAATCTCTGGAACAGATTTGGAATCACACGACCTGGATGGAGTGGGACA  
GAGAAATTAACAATTACACAAGCTTAATACTCCTTAATTGAAGAATCGCAAAAACAGCAAGAAAAGA  
ATGAACAAGAATTATTGGAATTAGATAAATGGGCAAGTTTGTGGAATTGGTTTAAACATAACAAATTGGCT  
GTGGTATATAAAATTTATCATAATGATAGTAGGAGGCTTGGTAGGTTTAAAGAATAGTTTTTGTGCTACTTT  
CTATAGTGAATAGAGTTAGGCAGGGATATTCACCATTATCGTTTCAGACCCACCTCCCAACCCCGAGGGG  
ACCCGACAGGCCCGAAGGAATAGAAGAAGAAGGTGGAGAGAGAGACAGAGACAGATCCATTCGATTAG  
TGAACGGATCTCGACGGTATCGGTTAACTTTTAAAGAAAAGGGGGGATTGGGGGTACAGTGCAGGGG  
AAAGAATAGTAGACATAATAGCAACAGACATACAACTAAAGAATTACAAAAACAATTACAAAAATTC  
AAAATTTTATCGATCACGAGACTAGCCTC





ATTGAAGCTGAGGGAGCCACAGCTCCCCTGACAGAGTTACTCCACTCCAGGAATGAAGGCGTGGCAACAT  
ACGCAGCTGCTGTCCTATTCCGAATGTCTGAGGACAAGCCACAGGATTACAAGAAGCGGCTTTCAGTCTGA  
GCTGACCAGTTCCTCTTCAGGACAGAGCCAATGGCTTGGAAATGAGACTGCAGATCTTGGACTGGACATT  
GGTGCCAGGGAGAAGCCCTTGATATCGCCAGGATGATCCCAGCTACCGTTCTTTTACTCTGGTGGAT  
ACGGCCAGGATGCCTTGGGGATGGACCCTATGATGGAGCATGAGATGGGTGGCCACCACCCTGGTGTGA  
CTATCCAGTTGATGGGCTGCCTGATCTGGGACACGCCAGGACCTCATGGATGGGCTGCCCCAGGTGAT  
AGCAATCAGCTGGCCTGGTTTGATACTGACCTGTAACCCGGGGAATTCCTCGAGAAGCTGGGGCTCGAGA  
TCTAGAGTCGAGAAGCTTGATGATCTGCGCAGCACCATGGCCTGAAATAACCTCTGAAAGAGGAACTTGG  
TTAGGTACCTTCTGAGGCGGAAAGAACCAGCTGTGGAATGTGTGTCAGTTAGGGTGTGGAAAGTCCCCAG  
GCTCCCCAGCAGGCAGAAGTATGCAAAGCATGCATCTCAATTAGTCAGCAACCAGGTGTGGAAAGTCCCC  
AGGCTCCCCAGCAGGCAGAAGTATGCAAAGCATGCATCTCAATTAGTCAGCAACCAGGTGTGGAAAGTCCCC  
ACTCCGCCATCCCCCCTAACTCCGCCAGTTCGCCCATTTCCGCCCATGGCTGACTAATTTTTTTTT  
ATTTATGCAGAGGCGAGCCGCTCGCCTCTGAGCTATTCCAGAAGTAGTGAGGAGGCTTTTTTTGGAG  
GCCTAGGCTTTTGCAAAAAGCTTACCATGACCGAGTACAAGCCCACGGTGCCTCGCCACCCGCGACGA  
CGTCCCCAGGGCCGTACGCACCCTCGCCGCCGCTTCGCCGACTACCCGCCACGCGCCACACCGTTCGAT  
CCGGACCGCCACATCGAGCGGGTCAACGAGCTGCAAGAACTTTCCTCACGCGCGTGGGCTCGACATCG  
GCAAGGTGTGGGTGCGCGACGACGGCGCCGCGGTGGCGGTCTGGACCACGCCGAGAGCGTCAAGCGG  
GGGCGGTGTTTCGCCGAGATCGGCCCGCGCATGGCCGAGTTGAGCGGTTCCCGGCTGGCCGCGCAGCAACA  
GATGGAAGGCCTCCTGGCGCCGACCGGCCAAGGAGCCCGCGTGGTTTCTGGCCACCGTTCGGCGTCTCG  
CCCGACCACCAGGGCAAGGGTCTGGGCAGCGCCGTCGTGCTCCCCGGAGTGGAGGCGCCGAGCGCGCC  
GGGGTGCCCGCCTTCTGGAGACCTCCGCGCCCCGCAACCTCCCCTTCTACGAGCGGCTCGGCTTACCCT  
CACCGCCGACGTCGAGTGCCCGAAGGACCGCGCGACCTGGTGCATGACCCGCAAGCCCGGTGCCTGACG  
CCCGCCCCACGACCCGACGCGCCGACCAGAAAGGAGCGCACGACCCCATGCCAGTCGACAATCAACCTCT  
GGATTACAAAATTTGTAAAGATTGACTGGTATTCTTAATACTATGTTGCTCCTTTTACGCTATGTGGATACG  
CTGCTTTAATGCCTTTGTATCATGCTATTGCTTCCCGTATGGCTTTCATTTTCTCCTCCTTGTATAAATCCTG  
GTTGCTGTCTCTTTATGAGGAGTTGTGGCCCGTTGTGAGGCAACGTGGCGTGGTGTGCACTGTGTTTGGT  
ACGCAACCCCACTGGTTGGGGCATTGCCACCACCTGTCAGCTCCTTCCGGGACTTTCGCTTCCCCCTC  
CCTATTGCCACGGCGGAACATCGCCGCTGCCTTGCCCGCTGCTGGACAGGGGCTCGGCTGTTGGGCA  
CTGACAATTCGCTGGTGTGTCGGGGAAGCTGACGTCCTTTCATGGCTGCTCGCCTGTGTTGCCACCTGG  
ATTCTGCGCGGGACGTCCTTCTGCTACGTCCTTCGGCCCTCAATCCAGCGGACCTTCTTCCCGCGGCT  
GCTGCCGGCTCTGCGGCCTTTCGCGTCTTCGCCTTCGCCCTCAGACGAGTCGGATCTCCCTTGGGCGG  
CCTCCCCGCTGGAATTCGAGCTCGGTACCTTTAAGACCAATGACTTACAAGGCAGCTGTAGATCTTAGCC  
ACTTTTTAAAAGAAAAGGGGGGACTGGAAGGGCTAATTCCTCCAACGAAGACAAGATCTGCTTTTTGC  
TTGTAAGCCTCAATAAAGCTTGCCTTGAGTGCTTCAAGTAGTGTGTGCCCCGTGTGTGTGACTCTGGTAAC  
TAGAGATCCCTCAGACCCCTTTAGTCAAGTGTGAAAATCTCTAGCAGTAGTAGTTTCATGTCATCTTATTAT  
TCAGTATTTATAACTTGCAAAGAAATGAATATCAGAGAGTGAGAGGAACTTGTTTATTGCAGCTTATAAT  
GGTTACAAATAAAGCAATAGCATCACAAATTCACAAATAAAGCATTTTTTTACTGCATTCTAGTTGTGG  
TTTGTCCAAACTCATCAATGTATCTTATCATGTCTGGCTCTAGCTATCCCGCCCCTAACTCCGCCAGTTCC  
GCCATTCTCCGCCCATGGCTGACTAATTTTTTTTTATTTATGCAGAGGGCCGAGGCCGCCTCGGCCTCTGA  
GCTATTCCAGAAGTAGTGAGGAGGCTTTTTTGGAGGCCTAGGCTTTTGCGTGCGAGACGTACCCAATTCGCC  
CTATAGTGAGTCGTATTACGCGCGCTCACTGGCCGTCGTTTTACAACGTCGTGACTGGGAAAACCTGGC  
GTTACCCAATTAATCGCCTTGCAGCACATCCCCCTTTCGCCAGCTGGCGTAATAGCGAAGAGGCCCGCA  
CCGATCGCCCTTCCCAACAGTTGCGCAGCCTGAATGGCGAATGGCGCGACGCGCCCTGTAGCGGCGCATT  
AAGCGCGGCGGGTGTGGTGGTTACGCGCAGCGTGACCGCTACACTTGCCAGCGCCCTAGCGCCCGCTCCT  
TTCGCTTTCTCCCTTCTTCTCGCCACGTTCCCGGCTTCCCGCTCAAGCTCTAAATCGGGGGCTCCCT  
TTAGGGTTCCGATTTAGTGCTTTACGGCACCTCGACCCCAAAAACTTGATTAGGGTGTGGTTACGCTAG  
TGGGCCATCGCCCTGATAGACGGTTTTTTCGCCCTTTCGAGTTGGAGTCCACGTTCTTTAATAGTGGACTCT  
TGTTCCAAACTGGAACAACACTCAACCCTATCTCGGTCTATTCTTTGATTATAAGGGATTTTGCCGATTT  
CGGCCTATTGGTTAAAAAATGAGCTGATTTAACAAAAATTTAACGCGAATTTTAAACAAAATATTAACGTT  
TACAATTTCCAGGTGGCACTTTTCGGGGAAATGTGCGCGGAACCCCTATTTGTTATTTTTCTAAATACA  
TTCAAATATGTATCCGCTCATGAGACAATAACCCTGATAAATGCTTCAATAATATTGAAAAAGGAAGAGT  
ATGAGTATTCACATTTCCGTGTCGCCCTTATCCCTTTTTTGCGGCATTGTCCTTCTGTTTTTGTCCACC  
CAGAAACGCTGGTGAAGTAAAAGATGCTGAAGATCAGTTGGGTGCACGAGTGGGTACATCGAACTGG  
ATCTCAACAGCGGTAAAGATCCTTGAGAGTTTTTCGCCCGAAGAACGTTTTCCAATGATGAGCACTTTTAAA  
GTTCTGCTATGTGGCGCGGTATTATCCCGTATTGACGCCGGGCAAGAGCAACTCGGTGCGCCGACACT  
ATTCTCAGAAAGACTTGGTTGAGTACTCACAGTACAGAAAAGCATCTTACGGATGGCATGACAGTAAG  
AGAATTATGCAGTGTGCCATAACCATGAGTGATAACACTGCGGCCAACTTACTTCTGACAACGATCGGA  
GGACCGAAGGACTAACCGCTTTTTTGCACAACATGGGGGATCATGTAACCTGCCTTGTATCGTTGGGAAC  
CGGAGCTGAATGAAGCCATACCAAACGACGAGCGTGACACCACGATGCCTGTAGCAATGGCAACAACGT  
TGCGCAAACTATTAAGTGGCGAACTACTTACTCTAGCTTCCCGGCAACAATTAATAGACTGGATGGAGGC  
GGATAAAGTTGCAGGACCACTTCTGCGCTCGGCCCTTCCGGCTGGCTGGTTTATTGCTGATAAATCTGGAG

CCGGTGAGCGTGGGTCTCGCGGTATCATTGCAGCACTGGGGCCAGATGGTAAGCCCTCCCGTATCGTAGT  
TATCTACACGACGGGGAGTCAGGCAACTATGGATGAACGAAATAGACAGATCGCTGAGATAGGTGCCTC  
ACTGATTAAGCATTGGTAAGTGTGACACCAAGTTTACTCATATATACTTTAGATTGATTTAAAACCTTCATT  
TTAATTTAAAAGGATCTAGGTGAAGATCCTTTTTGATAATCTCATGACCAAAAATCCCTTAACGTGAGTTT  
TCGTTCCACTGAGCGTCAGACCCCGTAGAAAAGATCAAAGGATCTTCTTGAGATCCTTTTTTTCTGCGCGT  
AATCTGCTGCTTGCAAAACAAAAAACCACCGCTACCAGCGGTGGTTTGTGGCCGATCAAGAGCTACCA  
ACTCTTTTTCCGAAGGTAAGTGGCTTCAGCAGAGCGCAGATACCAAATACTGTCTTCTAGTGTAGCCGTA  
GTTAGGCCACCACTTCAAGAACTCTGTAGCACCAGCTACATAACCTCGCTCTGCTAATCCTGTTACCAGTGG  
CTGCTGCCAGTGGCGATAAGTCGTGTCTTACCGGGTTGGACTCAAGACGATAGTTACCGGATAAGGCGCA  
GCGGTGCGGGCTGAACGGGGGGTTCGTGCACACAGCCAGCTTGGAGCGAACGACCTACACCGAACTGAG  
ATACCTACAGCGTGAAGTATGAGAAAGCGCCACGCTTCCCGAAGGGAGAAAGGCGGACAGGTATCCGGT  
AAGCTGCAGGTCGGAACAGGAGAGCGCACGAGGGAGCTTCCAGGGGAAACGCGCTGGTATCTTTATAG  
TCTGTGCGGGTTTCGCCACCTCTGACTGTAGCTGAGCTGAGCTGATTTTTGTGATGCTCGTCAGGGGGCGGAGCCTAT  
GGAAAACGCCAGCAACGCGGCCTTTTTACGGTTCCTGGCCTTTTGCTGGCCTTTTGCTCACATGTTCTTTC  
CTGCGTTATCCCCTGATTCTGTGGATAACCGTATTACCGCCTTTGAGTGAGCTGATACCGCTCGCCGACG  
CGAACGACCCGAGCGCAGCGAGTCAGTGAGCGAGGAAGCGGAAGAGCGCCCAATACGCAAACCGCCTCTC  
CCCGCGGTTGGCCGATTCAATTAATGCAGCTGGCACGACAGGTTTCCCGACTGGAAAGCGGGCAGTGAGC  
GCAACGCAATTAATGTGAGTTAGCTCACTCATTAGGCACCCAGGCTTTACACTTTATGCTTCCGGCTCGT  
ATGTTGTGTGGAATTGTGAGCGGATAACAATTTACACAGGAAACAGCTATGACCATGATTACGCCAAGC  
GCGCAATTAACCTCACTAAAGGGAACAAAAGCTGGAGCTGCAAGCTTAATGTAGTCTTATGCAATACTC  
TTGTAGTCTTGCAACATGGTAACGATGAGTTAGCAACATGCCTTACAAGGAGAGAAAAAGCACCGTGCAT  
GCCGATTGGTGGAAGTAAGGTGGTACGATCGTGCCTTATTAGGAAGGCAACAGACGGGTCTGACATGGAT  
TGGACGAACCACTGAATTGCCGCATTGCAGAGATATTGTATTTAAGTGCCTAGCTCGATAACAATAACGG  
GTCTCTCTGGTTAGACCAGATCTGAGCCTGGGAGCTCTCTGGCTAACTAGGGAACCCACTGCTTAAGCCTC  
AATAAAGCTTGCTTGAGTGCTTCAAGTAGTGTGTGCCCGTCTGTTGTGTGACTCTGGTAACTAGAGATCC  
CTCAGACCCTTTTAGTCAGTGTGGAAAATCTCTAGCAGTGGCGCCCGAACAGGGACCTGAAAGCGAAAGG  
GAAACCAGAGCTCTCTCGACGCAGGACTCGGCTTGCTGAAGCGCGCACGGCAAGAGGCGAGGGGGCGGCG  
ACTGGTGAGTACGCCAAAAATTTGACTAGCGGAGGCTAGAAGGAGAGAGATGGGTGCGAGAGCGTCAG  
TATTAAGCGGGGGAGAATTAGATCGCGATGGGAAAAAATTCGGTTAAGGCCAGGGGGGAAAGAAAAAATA  
TAAATTAACATATAGTATGGGCAAGCAGGGAGCTAGAACGATTTCGAGTTAATCCTGGCCTGTTAGAA  
ACATCAGAAGGCTGTAGACAAATACTGGGACAGCTACAACCATCCCTTCAGACAGGATCAGAAGAAGT  
AGATCATTATATAATACAGTAGCAACCCTCTATTGTGTGCATCAAAGGATAGAGATAAAAGACACCAAGG  
AAGCTTTAGACAAGATAGAGGAAGAGCAAAACAAAAGTAAGACCACCGCACAGCAAGCGGCCGCTGATC  
TTCAGACCTGGAGGAGGAGATATGAGGGACAATTGGAGAAGTGAATTATATAAATATAAAGTAGTAAAA  
ATTGAACCATTAGGAGTAGCACCCACCAAGGCAAAGAGAAGAGTGGTGCAGAGAGAAAAAAGAGCAGT  
GGGAATAGGAGCTTTGTTCTTGGGTTCTTGGGAGCAGCAGGAAGCACTATGGGCGCAGCCTCAATGACG  
CTGACGGTACAGGCCAGACAATTATTGTCTGGTATAGTGCAGCAGCAGAACAATTTGCTGAGGGCTATTG  
AGGCGCAACAGCATCTGTTGCAACTCACAGTCTGGGGCATCAAGCAGCTCCAGGCAAGAATCCTGGCTGT  
GGAAAGATACCTAAAGGATCAACAGCTCCTGGGGATTGGGGTTGCTCTGGAAAACCTCATTGCAACCACT  
GCTGTGCCCTTGGAATGCTAGTTGGAGTAATAAATCTCTGGAACAGATTTGGAATCACACGACCTGGATGG  
AGTGGGACAGAGAAATTAACAATTACACAAGCTTAATACTCCTTAATTGAAGAATCGCAAAACAGC  
AAGAAAAGAATGAACAAGAATTATTGGAATTAGATAAATGGGCAAGTTTGTGGAATTGGTTTAACATAA  
CAAATTGGCTGTGGTATATAAAATTATTCATAATGATAGTAGGAGGCTTGGTAGGTTTAAGAATAGTTTTT  
GCTGTACTTTCTATAGTGAATAGAGTTAGGCAGGGATATTACCATTATCGTTTCAGACCCACCTCCCAAC  
CCCGAGGGGACCCGACAGGCCCGAAGGAATAGAAGAAGAAGGTGGAGAGAGAGACAGAGACAGATCCA  
TTCGATTAGTGAACGGATCTCGACGGTATCGGTAACTTTTTAAAAGAAAAGGGGGGATTGGGGGTACAG  
TGCAGGGGAAAGAATAGTAGACATAATAGCAACAGACATACAAACCTAAAGAATTACAAAAACAAATTAC  
AAAAATCAAAATTTTATCGATCACGAGACTAGCCTC

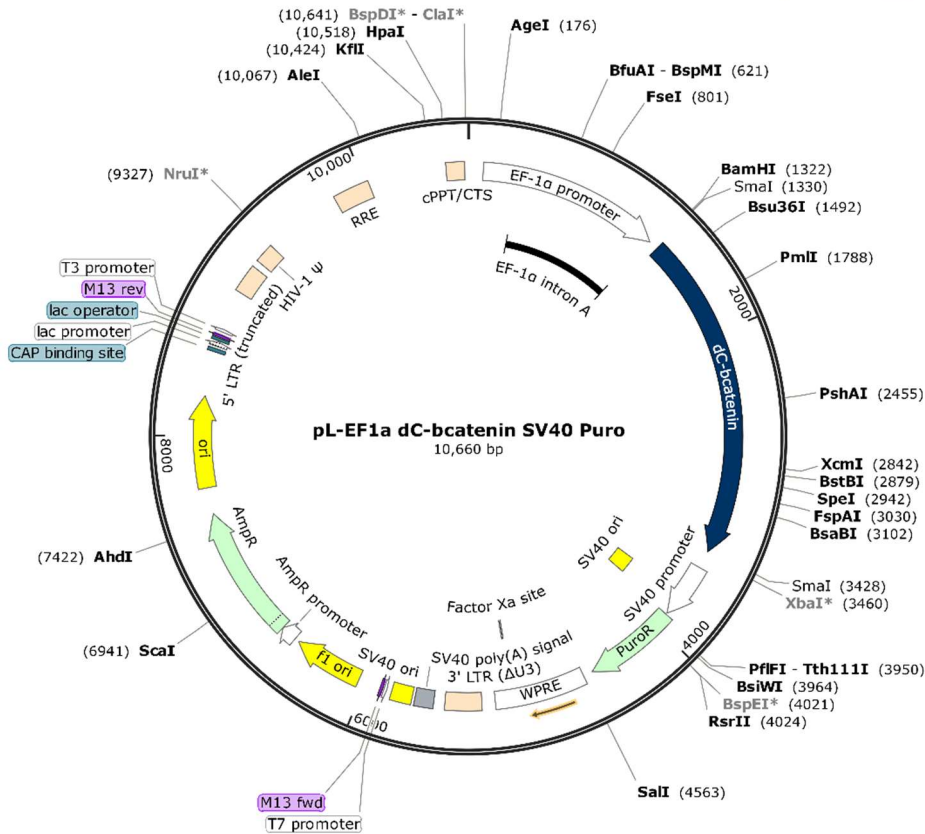

**>pL-EF1a ΔC-βcatenin SV40 Puro**

CTAGCCCCGATAAGCTTTGCAAAGATGGATAAAGTTTTAAACAGAGAGGAATCTTTGCAGCTAATGGACC  
 TTCTAGGTCTTGAAAGGAGTGGGAATTGGCTCCGGTGCCTCAGTGGGCAGAGCGCACATCGCCACAG  
 TCCCCGAGAAGTTGGGGGGAGGGGTCGGCAATTGAACCGGTGCCTAGAGAAGGTGGCGCGGGGTAAACT  
 GGGAAAGTGTATGTCGTGTACTGGCTCCGCCTTTTTCCCGAGGGTGGGGGAGAACCCTATATAAGTGCAGT  
 AGTCGCCGTGAACGTTCTTTTTTCGCAACGGGTTTCCCGCCAGAACACAGGTAAGTGCCTGTGTGGTTCCC  
 GCGGGCCTGGCCTTTTACGGGTTATGGCCCTTTCGCTGCCATTGAATTACTTCCACTGGCTGCAGTACGTGA  
 TTCTTGATCCCAGCTTCCGGTTGGAAGTGGGTGGGAGAGTTCGAGGCCTTGCCTTAAGGAGCCCTTC  
 GCCTCGTGCTTGAGTTGAGGCTGGCCTGGGCGCTGGGGCCCGCGTGCGAATCTGGTGGCACCTTCGC  
 GCCTGTCTCGCTGCTTTTCGATAAGTCTCTAGCCATTTAAAATTTTTGATGACCTGCTGCGACGCTTTTTTTC  
 TGGCAAGATAGTCTTGTAATGCGGGCCAAGATCTGCACACTGGTATTTTCGGTTTTTGGGGCCGCGGGCG  
 GCGACGGGGCCCGTGCCTCCAGCGCACATGTTTCGGCGAGGCGGGGCCTGCGAGCGCGGCCACCGAGAA  
 TCGGACGGGGGTAGTCTCAAGCTGGCCGGCCTGCTCTGGTGCCTGGCCTCGCGCCCGCGTGTATCGCCCC  
 GCCCTGGGCGGCAAGGCTGGCCCGTCCGGCACCAGTTGCGTGAGCGGAAAGATGGCCGCTTCCCGGCCCT  
 GCTGCAGGGAGCTCAAAATGGAGGACGCGGCGCTCGGGAGAGCGGGCGGGTGTGATCACCCACACAAAG  
 GAAAAGGGCCTTTCCGTCCTCAGCCGTCGCTTCATGTGACTCCACGGAGTACCGGGCGCCGTCCAGGCAC  
 CTCGATTAGTTCTCGAGCTTTTGGAGTACGTCGCTTTAGGTTGGGGGAGGGGTTTTATGCGATGGAGTT  
 TCCCCACACTGAGTGGGTGGAGACTGAAGTTAGGCCAGCTTGGCACTTGATGTAATTCTCCTTGGAATTTG  
 CCCTTTTTGAGTTTGGATCTTGTTTATTCTCAAGCCTCAGACAGTGGTTCAAAGTTTTTTTTCTTCCATTT  
 AGGTGTCGTGAGGAATTCTGCAGTCGATCGACGGTACCGCGGGCCCTCCGCGGCCGCGGATCCCCGGGC  
 CACATGGCTACTCAAGCTGACCTGATGGAGTTGGACATGGCCATGGAGCCGGACAGAAAAGCTGCTGTCA  
 GCCACTGGCAGCAGCAGTCTTACTTGGATTCTGGAATCCATTCTGGTGCCACCACCACAGCTCCTTCCCTG  
 AGTGGAAGGGCAACCCTGAGGAAGAAGATGTTGACACCTCCCAAGTCTTTATGAATGGGAGCAAGGC  
 TTTTCCAGTCTTACGCAAGAGCAAGTAGCTGATATTGACGGGCAGTATGCAATGACTAGGGCTCAGA  
 GGGTCCGAGCTGCCATGTTCCCTGAGACGCTAGATGAGGGCATGCAGATCCCATCCACGCAGTTTGACGC  
 TGCTCATCCACTAATGTCCAGCGCTTGGCTGAACCATCACAGATGTTGAAACATGCAGTTGTCAATTTGA  
 TTAATATCAGGATGACGCGGAACCTGCCACACGTGCAATTCCTGAGCTGACAAAACGCTAAACGATGA  
 GGACCAGGTGGTAGTTAATAAAGCTGCTGTTATGGTCCATCAGCTTTCCAAAAGGAAGCTTCCAGACAT  
 GCCATCATGCGACTCCCCCTCAGATGGTGTCTGACATTGTACGCACCATGCAGAATACAAATGATGTAGAGA  
 CAGCTCGTTGTACTGCTGGGACTCTGCACAACCTTTCTACCACCGCGAGGGCTTGTCTGGCCATCTTTAAG  
 TCTGGTGGCATCCGACGCTGGTGAATAATGCTTGGTCCACCAGTGGATTCTGTACTGTCTTACGCCATCAC  
 GACACTGCATAATCTCCTGCTCCATCAGGAAGGAGCTAAAATGGCAGTGCCTAGCTGGTGGACTGCAG  
 AAAATGGTTGCTTTGCTCAACAAAACAAACGTGAAATTTTGGCTATTACAACAGACTGCCTTCAGATCTT

AGCTTATGGCAATCAAGAGAGCAAGCTCATCATTCTGGCCAGTGGTGGACCCCAAGCCTTAGTAAACATA  
ATGAGGACCTACACTTATGAGAAGCTTCTGTGGACCACAAGCAGAGTGCTGAAGGTGCTGTCTGTCTGCT  
CTAGCAACAAGCCGGCCATTGTAGAAGCTGGTGGGATGCAGGCACTGGGGCTTCATCTGACAGACCCAA  
GTCAGCGACTTGTTCAAACTGTCTTTGGACTCTCAGAAACCTTTCAGATGCAGCGACTAAGCAGGAAGG  
GATGGAAGGCCCTCCTTGGGACTCTAGTGCAGCTTCTGGGTTCCGATGATATAAATGTGGTCACTGTGCA  
GCTGGAATTCTCTCTAACCTCACTTGCAATAATTACAAAAACAAGATGATGGTGTGCCAAGTGGGTGGCA  
TAGAGGCTCTTGTACGCACCGTCCTTCGTGCTGGTGACAGGGAAGACATCACTGAGCCTGCCATCTGTGCT  
CTTCGTCACTGACCAGCCGGCATCAGGAAGCCGAGATGGCCCAGAATGCCGTTCCGCTTCATTATGGAC  
TGCCTGTTGTGGTTAAACTCCTGCACCCACCATCCCCTGGCCTCTGATAAAGGCAACTGTTGGATTGATT  
CGAAACCTTGCCCTTTGCCAGCAAATCATGCGCCTTTGCGGGAACAGGGTGCTATTCCACGACTAGTTCA  
GCTGCTTGTACGAGCACATCAGGACACCCAAACGGCGCACCTCCATGGGTGGAACGCAGCAGCAGTTTGTG  
GAGGGCGTGCATGGAGGAGATAGTAGAAGGGTGTACTGGAGCTCTCCACATCCTTGCTCGGGACGTTT  
ACAACCGGATTGTAATCCGAGGACTCAATAACCATTCCATTGTTTGTGCAGTTGCTTTATTCTCCATTGAA  
AATATCCAAAGAGTAGCTGCAGGGGTCTCTGTGAACTTGTCTCAGGACAAGGAGGCTGCAGAGGCCATTG  
AAGCTGAGGGAGCCACAGCTCCCCTGACAGAGTTACTCCACTCCAGGAATGAAGGCGTGGCAACATACG  
CAGCTGCTGTCTATTCCGAATGTCTGAGGACAAGCCACAGGATTACAAGAAGCGGCTTTCAGTCGAGCT  
GACCAGTTCCTCTTCAGGACAGAGCCAATGGCTTGGAAATGAGACTGCAGATTAACCCGGGGAATTCCTC  
GAGAAGCTGGGGCTCGAGATCTAGAGTCGAGAAGCTTGATGATCTGCGCAGCACCATGGCCTGAAATAA  
CCTCTGAAAGAGGAACTTGTTAGGTACCTTCTGAGGCGGAAAGAACCAGCTGTGGAATGTGTGTCAGTT  
AGGGTGTGGAAGTCCCAGGCTCCCAGCAGGCAGAAGTATGCAAAGCATGCATCTCAATTAGTCAGC  
AACCAGGTGTGGAAGTCCCAGGCTCCCAGCAGGCAGAAGTATGCAAAGCATGCATCTCAATTAGTCA  
GCAACCATAGTCCCGCCCCTAACTCCGCCATCCCGCCCCTAACTCCGCCAGTTCGCGCCATTCTCCGCC  
CCATGGCTGACTAATTTTTTTTTATTTATGCAGAGGCGGAGGCCGCTCGGCCTCTGAGCTATTCCAGAAGT  
AGTGAGGAGGCTTTTTTGGAGGCCTAGGCTTTTGCAAAAAGCTTACCATGACCAGGTACAAGCCCACGGT  
GCGCCTCGCCACCCGCGACGACGTCCCAGGGCCGTACGCACCCTCGCCGCGGCTTCGCGACTACCCC  
GCCACGCGCCACACCGTCGATCCGGACCGCCACATCGAGCGGGTCACCGAGCTGCAAGAACTCTTCCTCA  
CGCGCTCGGGCTCGACATCGGCAAGGTGTGGGTGCGGGACGACGGCGCCGCGGTGGCGGTCTGGACCA  
CGCCGGAGAGCGTCAAGCGGGGGCGGTGTTCCGCCGAGATCGGCCCGCGCATGGCCGAGTTGAGCGGT  
CCCGGCTGGCCGCGCAGCAACAGATGGAAGGCCTCCTGGCGCCGACCCGGCCCAAGGAGCCCGCGTGGT  
TCCTGGCCACCGTCGGCGTCTCGCCGACCACCAGGGCAAGGGTCTGGGCAGCGCCGTCGTGCTCCCCG  
AGTGAGGCGGCGGAGCGCGCCGGGTGCCCGCCTTCTGGAGACCTCCGCGCCCCGCAACCTCCCCTTC  
TACGAGCGGCTCGGCTTACCGTCACCGCCGACGTCGAGTGCCCGAAGGACCGCGCGACCTGGTGCATGA  
CCCGCAAGCCCGGTGCCTGACGCCCCGCCACGACCCGACGCGCCCGACCGAAAGGAGCGCACGACCCC  
ATGCCAGTCGACAATAACCTCTGGATTACAAAATTTGTGAAAGATTGACTGGTATTCTTAACTATGTTGC  
TCCTTTACGCTATGTGATAACCTGTTGCTGTCTCTTTATGAGGAGTTGTGGCCGTTGTCAGGCAACGTGG  
TTTCTCCTCCTGTATAAATCCTGTTGCTGTCTCTTTATGAGGAGTTGTGGCCGTTGTCAGGCAACGTGG  
CGTGGTGTGCACTGTGTTTGTGACGCAACCCCACTGGTTGGGGCATTGCCACCACCTGTGACGTCCTTT  
CCGGGACTTTCGCTTTCCCCCTCCCTATTGCCACGGCGGAACTCATCGCCGCTGCCTTGCCCGCTGCTGG  
ACAGGGGCTCGGCTGTTGGGCACTGACAATTCGTGGTGTGTCGGGGAAGCTGACGTCTTTCCATGGC  
TGCTCGCTGTGTTGCCACCTGGATTCTGCGCGGGACGTCCTTCTGCTACGTCCCTTCGGCCCTCAATCCA  
GCGGACCTTCTTCCCGCGGCTGCTGCCGGCTCTGCGGCCTTTCGCGCTTTCGCCTTCGCCCTCAGAC  
GAGTCGGATCTCCCTTTGGGCGCCTCCCCGCCTGGAATTCGAGCTCGGTACCTTTAAGACCAATGACTTA  
CAAGGCAGCTGTAGATCTTAGCCACTTTTTAAAAGAAAAGGGGGGACTGGAAGGGCTAATTCCTCCCAA  
CGAAGACAAGATCTGCTTTTTGCTTGTACTGGGTCTCTCTGGTTAGACCAGATCTGAGCCTGGGAGCTCTC  
TGGCTAACTAGGGAACCCACTGCTTAAGCCTCAATAAAGCTTGCCCTGAGTGCTTCAAGTAGTGTGTGCC  
GTCTGTTGTGACTCTGGTAACTAGAGATCCCTCAGACCCTTTTAGTCAGTGTGGAATACTCTAGCAGT  
AGTAGTTCATGTATCTTATTATTCAGTATTTATAACTTGCAAAGAAATGAATATCAGAGAGTGAGAGGA  
ACTTGTATTATGCAGCTTATAATGGTTACAAATAAAGCAATAGCATCACAAATTTACAAATAAAGCATT  
TTTTACTGCATTCTAGTTGTGGTTTGTCCAAACTCATCAATGTATCTTATCATGTCTGGCTCTAGCTATCC  
CGCCCTAACTCCGCCAGTTCCGCCATTCTCCGCCCATGGCTGACTAATTTTTTTTTATTATGCAGAGG  
CCGAGGCCGCTCGGCCTCTGAGCTATTCCAGAAGTAGTGAGGAGGCTTTTTTGGAGGCCTAGGCTTTTGC  
GTCGAGACGTACCCAATTCGCCCTATAGTGAGTCGTATTACGCGCGCTCACTGGCCGTCGTTTTACAACGT  
CGTACTGGGAAAACCCTGGCGTTACCCAATTAATCGCCTTGACGACATCCCCCTTCGCCAGCTGGCG  
TAATAGCGAAGAGGCCCGCACCGATCGCCCTTCCCAACAGTTGCGCAGCCTGAATGGCGAATGGCGCGAC  
GCGCCCTGACGCGCGCATTAAAGCGCGCGGGTGTGGTGGTTACGCGCAGCGTGACCGCTACACTTGCCA  
GCGCCCTAGCGCCGCTCCTTTCGCTTTCTTCCCTTCTTCTCGCCACGTTCCGCGGCTTTCCCGTCAAG  
CTCTAAATCGGGGGCTCCCTTTAGGGTTCCGATTTAGTGCTTTACGGCACCTCGACCCCAAAAACCTGAT  
TAGGGTGTGGTACGTAGTGGCCATCGCCCTGATAGACGTTTTTTCGCCCTTTGACGTTGGAGTCCAC  
GTTCTTTAATAGTGGACTTGTGTTCCAAACTGGAACAACACTCAACCTATCTCGGTCTATTCTTTGATTT  
ATAAGGATTTTGGCATTTCGGCCTATTGGTTAAAAAATGAGCTGATTTAACAATAAATTAACGCGAAT  
TTAACAATAATTAACGTTTACAATTTCCAGGTGGCACTTTTCGGGGAATGTGCGCGGAACCCCTATT  
TGTTATTTTTCTAAATACATTCAAATATGTATCCGCTCATGAGACAATAACCCTGATAAATGCTTCAATA

ATATTGAAAAAGGAAGAGTATGAGTATTCAACATTTCCGTGTCGCCCTTATTCCCTTTTTTGCGGCATT  
GCCTTCTGTTTTTGCTCACCCAGAAACGCTGGTGAAGTAAAAGATGCTGAAGATCAGTTGGGTGCACG  
AGTGGGTACATCGAACTGGATCTCAACAGCGGTAAGATCCTTGAGAGTTTTCCGCCCGAAGAACGTTTT  
CCAATGATGAGCACTTTAAAGTTCTGCTATGTGGCGCGGTATTATCCCGTATTGACGCCGGGCAAGAGC  
AACTCGGTGCGCCATACACTATTCTCAGAATGACTTGGTTGAGTACTCACCAGTACAGAAAAAGCATCT  
TACGGATGGCATGACAGTAAGAGAATTATGCAGTGCTGCCATAACCATGAGTGATAACACTGCGGCCAAC  
TACTTCTGACAACGATCGGAGGACCGAAGGAGCTAACCGCTTTTTTGACAACATGGGGGATCATGTAA  
CTCGCTTGATCGTTGGGAACCGGAGCTGAATGAAGCCATACCAAACGACGAGCGTGACACCACGATGCC  
TGTAAGCAATGGCAACAACGTTGCGCAAACCTATTAAGTGGCGAACTACTTACTCTAGCTTCCCGGCAACA  
TTAATAGACTGGATGGAGGCGGATAAAGTTGCAGGACCACTTCTGCGCTCGGCCCTCCGGCTGGCTGGT  
TTATTGCTGATAAATCTGGAGCCGGTGAGCGTGGGTCTCGCGGTATCATTGCAGCACTGGGGCCAGATGG  
TAAGCCCTCCCGTATCGTAGTTATCTACACGACGGGAGTCAGGCAACTATGGATGAACGAAATAGACAG  
ATCGCTGAGATAGTGCCTCACTGATTAAGCATTGGTAACTGTCAGACCAAGTTTACTCATATATACTTTA  
GATTGATTTAAAACCTCATTTTTTAATTTAAAAGGATCTAGGTGAAGATCCTTTTTGATAATCTCATGACCA  
AAATCCCTAACGTGAGTTTTCTGTTCCACTGAGCGTCAGACCCCGTAGAAAAGATCAAAGGATCTTCTTG  
AGATCCTTTTTTCTGCGCTAATCTGCTGCTTGCAAACAAAAAAACCACCGCTACCAGCGGTGGTTTGT  
TGCCGGATCAAGAGCTACCAACTCTTTTTCCGAAGGTAAGTGGCTTCAGCAGAGCGCAGATACCAAATAC  
TGTCCTTCTAGTGTAGCCGTAGTTAGGCCACCACTTCAAGAACTCTGTAGCACCGCCTACATACCTCGCTC  
TGCTAATCCTGTTACCAGTGGCTGCTGCCAGTGGCGATAAGTCGTGTCTTACCGGGTTGGACTCAAGACG  
ATAGTTACCGGATAAAGGCGCAGCGGTCGGGCTGAACGGGGGGTTCGTGCACACAGCCCAGCTTGGAGCG  
AACGACCTACACCGAACTGAGATACCTACAGCGTGAGCTATGAGAAAGCGCCACGCTTCCCGAAGGGAG  
AAAGGCGGACAGGTATCCGTAAGCGGCAGGGTCGGAACAGGAGAGCGCACGAGGGAGCTTCCAGGGG  
GAAACGCCTGGTATCTTTATAGTCTGTGCGGTTTTCCACCTCTGACTTGAGCGTCGATTTTTGTGATGCT  
CGTCAGGGGGGCGGAGCCTATGGAAAACGCCAGCAACCGGCCTTTTTACGGTTCCTGGCCTTTTGCTG  
GCCTTTTGCTCACATGTTCTTTCCTGCGTTATCCCCTGATTCTGTGGATAACCGTATTACCGCCTTTGAGTG  
AGCTGATACCGCTCGCCGACCCGAACGACCGAGCGCAGCGAGTCAGTGAGCGAGGAAGCGGAAGAGCG  
CCAATACGCAAACCGCCTCTCCCGCGCGTGGCCGATTCAATTAATGCAGCTGGCACGACAGTTTTCC  
GACTGGAAAGCGGGCAGTGAGCGCAACGCAATTAATGTGAGTTAGCTCACTCATTAGGCACCCAGGCTT  
TACACTTTATGCTTCCGGCTCGTATGTTGTGTGGAATTGTGAGCGGATAACAATTTACACAGGAAACAGC  
TATGACCATGATTACGCCAAGCGCGCAATTAACCCTACTAAAGGGAACAAAAGCTGGAGCTGCAAGCTT  
AATGTAGTCTTATGCAATACTCTTGTAGTCTTGCAACATGGTAACGATGAGTTAGCAACATGCCTTACAAG  
GAGAGAAAAAGCACCGTGCATGCCGATTGGTGGAAAGTAAGGTGGTACGATCGTGCCTTATTAGGAAGGC  
AACAGACGGGTCTGACATGGATTGGACGAACCACTGAATTGCCGATTGCAGAGATATTGTATTTAAGTG  
CCTAGCTCGATAACAATAAACGGTCTCTCTGTTAGACCAAGATCTGAGCCTGGGAGCTCTCTGGCTAAT  
AGGGAACCCACTGCTTAAGCCTCAATAAAGCTTGCCTTGAGTGTGCAAGTGTGAGTGTGTCGCTGTTGT  
GTGACTCTGGTAACTAGAGATCCCTCAGACCCCTTTAGTCACTGTTGGAATACTCTAGCAGTGGCCCG  
AACAGGGACCTGAAAGCGAAAGGAAACAGAGCTCTCTGACGACGAGGACTCGGCTTGTGAAAGCGCGC  
ACGGCAAGAGGCGAGGGGCGGCGACTGGTGAGTACGCCAAAAATTTGACTAGCGGAGGCTAGAAGGAG  
AGAGATGGGTGCGAGAGCGTACGATTAAGCGGGGAGAAATTAGATCGCGATGGGAAAAAATTCGGTTA  
AGGCCAGGGGAAAGAAAAAATAAAATTAACATATAAGTATGGGCAAGCAGGGAGCTAGAACGATTC  
GCAGTTAATCCTGGCCTGTTAGAAACATCAGAAGGCTGTAGACAAATACTGGGACAGCTACAACCATCCC  
TTCAGACAGGATCAGAAGAACTTAGATCATTATATAATACAGTAGCAACCCTCTATTGTGTGCATCAAAG  
GATAGAGATAAAAGACACCAAGGAAGCTTTAGACAAGATAGAGGAAGAGCAAAAACAAAAGTAAGACCA  
CCGCACAGCAAGCGGCCGCTGATCTTACAGCCTGGAGGAGGAGATATGAGGGACAATTGGAGAAGTGAA  
TTATATAAATAAAAGTAGTAAAAATTGAACCATTAGGAGTAGCACCCACCAAGGCAAAGAGAAGAGTG  
GTGCAGAGAGAAAAAGAGCAGTGGGAATAGGAGCTTTGTTCTTGGGTCTTGGGAGCAGCAGGAAGC  
ACTATGGGCGCAGCCTCAATGACGCTGACGGTACAGGCCAGACAATTATTGTCTGGTATAGTGCAGCAGC  
AGAACAATTTGCTGAGGGCTATTGAGGCGCAACAGCATCTGTTGCAACTCACAGTCTGGGGCATCAAGCA  
GCTCCAGGCAAGAATCCTGGCTGTGGAAAGATACCTAAAGGATCAACAGCTCCTGGGGATTTGGGGTTGC  
TCTGGAAAACCTCATTGCAACCACTGCTGTGCCTTGGAAATGCTAGTTGGAGTAATAAATCTCTGGAACAGAT  
TTGGAATCACACGACCTGGATGGAGTGGGACAGAGAAATTAACAATTACACAAGCTTAATACACTCCTTA  
ATTGAAGAATCGCAAAACCAGCAAGAAAAGAAATGAACAAGAATTATTGGAATTAGATAAATGGGCAAGT  
TTGTGGAATTGGTTTAAACATAACAAATTGGCTGTGGTATATAAAATTTTATAATGATAGTAGGAGGCTT  
GGTAGGTTTAAAGAAATAGTTTTTGTGCTGACTTTCTATAGTGAATAGAGTTAGGCAGGGATATTCACCATTAT  
CGTTTCAGACCCACCTCCCAACCCCGAGGGGACCCGACAGGCCCGAAGGAATAGAAGAAGAAGGTGGAG  
AGAGAGACAGAGACAGATCCATTCGATTAGTGAACGGATCTCGACGGTATCGGTTAACTTTTTAAAAGAAA  
AGGGGGGATTGGGGGTACAGTGCAGGGGAAAGAATAGTAGACATAATAGCAACAGACATACAAACTA  
AAGAATTACAAAAACAAATTACAAAAATTCAAATTTTATCGATCACGAGACTAGCCTC

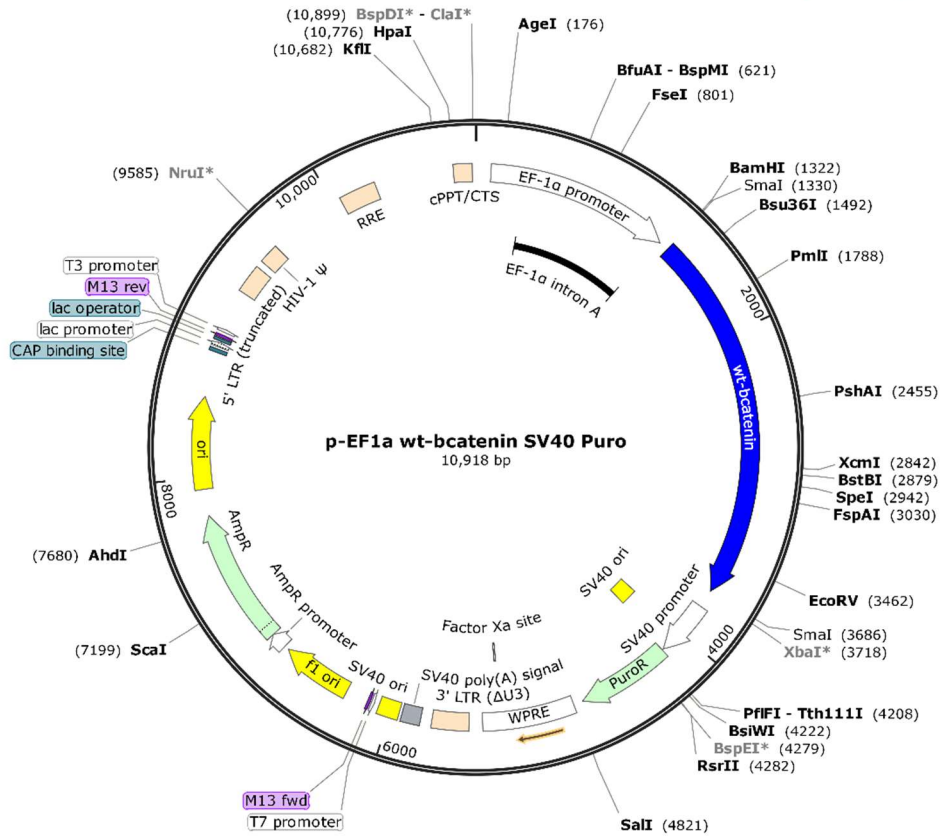

**>pL-EF1a wt-βcatenin SV40 Puro**

CTAGCCCCGATAAGCTTTGCAAAGATGGATAAAGTTTTAAACAGAGAGGAATCTTTGCAGCTAATGGACC  
 TTCTAGGTCTTGAAAGGAGTGGGAATTGGCTCCGGTGCCCGTCAGTGGGCAGAGCGCACATCGCCACAG  
 TCCCCGAGAAGTTGGGGGGAGGGGTTCGGCAATTGAACCGGTGCCTAGAGAAGGTGGCGCGGGGTAAACT  
 GGGAAAGTGATGTCGTGTACTGGCTCCGCCTTTTTCCCGAGGGTGGGGGAGAACCCTATATAAGTGCAGT  
 AGTCGCCGTGAACGTTCTTTTTCGCAACGGGTTTGCCGCCAGAACACAGGTAAGTGCCGTGTGTGGTTCCC  
 GCGGGCCTGGCCTCTTACGGGTTATGGCCCTTGCCTGCTTGAATTACTTCCACTGGCTGCAGTACGTGA  
 TTCTTGATCCCGAGCTTCGGGTTGGAAGTGGGTGGGAGAGTTCGAGGCCTTGCCTTAAGGAGCCCCTTC  
 GCCTCGTGCTTGAGTTGAGGCCTGGCCTGGGCGCTGGGGCCGCGCGTGCGAATCTGGTGGCACCTTTCCG  
 CCTGCTCGTCTGCTTTCGATAAGTCTCTAGCCATTTAAAAATTTTTGATGACCTGCTGCGACGCTTTTTTC  
 TGGCAAGATAGTCTTGTAATGCGGGCCAAGATCTGCACACTGGTATTTTCGGTTTTTTGGGGCCGCGGGCG  
 GCGACGGGGCCCGTGCCTCCAGCGCACATGTTTCGGCGAGGCGGGGCTGCGAGCGCGGCCACCGAGAA  
 TCGGACGGGGGTAGTCTCAAGCTGGCCGGCCTGCTCTGGTGCCTGGCCTCGCGCCCGCGTGTATCGCCCC  
 GCCCTGGGCGGCAAGGCTGGCCCCGTCGGCACCAGTTGCGTGAGCGGAAAGATGGCCGCTTCCCGGCCCT  
 GCTGCAGGGAGCTCAAAATGGAGGACGCGGCGCTCGGGAGAGCGGGCGGGTGAGTACCCACACAAAG  
 GAAAAGGGCCTTTCCGTCCTCAGCCGTCGCTTCATGTGACTCCACGGAGTACCGGGCGCCGTCAGGCAC  
 CTCGATTAGTTCTCGAGCTTTTGGAGTACGTCGCTTTAGGTTGGGGGAGGGGTTTTATGCGATGGAGTT  
 TCCCCACACTGAGTGGGTGGAGACTGAAGTTAGGCCAGCTTGGCACTTGATGTAATTCTCCTTGGAATTTG  
 CCTTTTTGAGTTTGGATCTTGTTTCATTCTCAAGCCTCAGACAGTGGTTCAAAGTTTTTTTTCTTCCATTT  
 AGGTGTCGTGAGGAATTCTGCAGTCGATCGACGGTACCGCGGGCCCTCCGCGGCCGCGGATCCCCCGGGC  
 CACATGGTACTCAAGCTGACCTGATGGAGTTGGACATGGCCATGGAGCCGGACAGAAAAGCTGCTGTCA  
 GCCACTGGCAGCAGCAGTCTTACTTGGATTCTGGAATCCATTCTGGTGCCACCACCACAGCTCCTTCCCTG  
 AGTGCCAAGGGCAACCCTGAGGAAGAAGATGTTGACACCTCCCAAGTCTTTATGAATGGGAGCAAGGC  
 TTTTCCAGTCTTACGCAAGAGCAAGTAGCTGATATTGACGGGCAGTATGCAATGACTAGGGCTCAGA  
 GGGTCCGAGCTGCCATGTTCCCTGAGACGCTAGATGAGGGCATGCAGATCCCATCCACGCAGTTTGACGC  
 TGCTCATCCCCTAATGTCCAGCGCTTGGCTGAACCATCACAGATGTTGAAACATGCAGTTGTCAATTTGA  
 TTAATATCAGGATGACGCGGAACCTGCCACACGTGCAATTCCTGAGCTGACAAAACGCTAAACGATGA  
 GGACCAGGTGGTAGTTAATAAAGCTGCTGTTATGGTCCATCAGCTTTCCAAAAGGAAGCTTCCAGACAT  
 GCCATCATGCGCTCCCCTCAGATGGTGTCTGCCATTGTACGCACCATGCAGAATACAAATGATGTAGAGA  
 CAGCTCGTTGACTGCTGGGACTCTGCACAACCTTTCTCACCACCGCGAGGGCTTGTGGCCATCTTTAAG  
 TCTGGTGGCATCCCAGCGCTGGTGAAAATGCTTGGGTACCAGTGGATTCTGTACTGTTCTACGCCATCAC  
 GACTGCATAATCTCTGCTCCATCAGGAAGGAGCTAAAATGGCAGTGCGCCTAGCTGGTGGACTGCAG  
 AAAATGGTTGCTTTGCTCAACAAAACAAACGTGAAATTTGGCTATTACAACAGACTGCCTCAGATCTT

AGCTTATGGCAATCAAGAGAGCAAGCTCATCATTCTGGCCAGTGGTGGACCCCAAGCCTTAGTAAACATA  
ATGAGGACCTACACTTATGAGAAGCTTCTGTGGACCACAAGCAGAGTGCTGAAGGTGCTGTCTGTCTGCT  
CTAGCAACAAGCCGGCCATTGTAGAAGCTGGTGGGATGCAGGCACTGGGGCTTCATCTGACAGACCCAA  
GTCAGCGACTTGTTCAAACCTGTCTTTGGACTCTCAGAAACCTTTCAGATGCAGCGACTAAGCAGGAAGG  
GATGGAAGGCCCTCCTTGGGACTCTAGTGCAGCTTCTGGGTTCCGATGATATAAATGTGGTCACCTGTGCA  
GCTGGAATTCTCTCTAACCTCACTTGCAATAATTACAAAAACAAGATGATGGTGTGCCAAGTGGGTGGCA  
TAGAGGCTCTTGTACGCACCGTCCTTCGTGCTGGTGACAGGGAAGACATCACTGAGCCTGCCATCTGTGCT  
CTTCGTCACTGACCAGCCGGCATCAGGAAGCCGAGATGGCCCAGAATGCCGTTCCGCTTCATTATGGAC  
TGCCTGTTGTGGTTAAACTCCTGCACCCACCATCCCCTGGCCTCTGATAAAGGCAACTGTTGGATTGATT  
CGAAACCTTGCCCTTTGCCAGCAAATCATGCGCCTTTGCCGGAACAGGGTGCTATTCCACGACTAGTTCA  
GCTGCTTGTACGAGCAGATCAGGACACCCAAACGGCGCACCTCCATGGGTGGAACGCAGCAGCAGTTTGTG  
GAGGGCGTGCATGGAGGAGATAGTAGAAGGGTGTACTGGAGCTCCACATCCTTGCTCGGACGCTTC  
ACAACCGGATTGTAATCCGAGGACTCAATAACCATTCATTGTTTGTGCAGTTGCTTTATTCTCCATTGAA  
AATATCCAAAGAGTAGCTGCAGGGGTCTCTGTGAACTTGCTCAGGACAAGGAGGCTGCAGAGGCCATTG  
AAGCTGAGGGAGCCACAGCTCCCCTGACAGAGTTACTCCACTCCAGGAATGAAGGCGTGGCAACATACG  
CAGCTGCTGTCCTATTCCGAATGTCTGAGGACAAGCCACAGGATTACAAGAAGCGGCTTTCAGTCGAGCT  
GACCAGTTCCTCTTCAGGACAGAGCCAATGGCTTGGAAATGAGACTGCAGATCTTGGACTGGACATTGGT  
GCCAGGGAGAAGCCCTTGGATATCGCCAGGATGATCCCAGCTACCGTCTTTTTCACTCTGGTGGATACG  
GCCAGGATGCCTTGGGGATGGACCCTATGATGGAGCATGAGATGGGTGGCCACCACCCTGGTGTGACTA  
TCCAGTTGATGGGCTGCCTGATCTGGGACACGCCAGGACCTCATGGATGGGCTGCCCCCAGGTGATAGC  
AATCAGCTGGCCTGTTTTGATACTGACCTGTAACCCGGGGAATTCCTCGAGAAGCTGGGGCTCGAGATCT  
AGAGTCGAGAAGCTTGATGATCTGCGCAGCACCATGGCCTGAAATAACCTCTGAAAGAGGAACTTGTTA  
GGTACCTTCTGAGGCGAAAGAACCAGCTGTGGAATGTGTGTCAGTTAGGGTGTGGAAAGTCCCCAGGCT  
CCCCAGCAGGCAGAAGTATGCAAAGCATGCATCTCAATTAGTCAGCAACCAGGTGTGGAAAGTCCCCAG  
GCTCCCCAGCAGGCAGAAGTATGCAAAGCATGCATCTCAATTAGTCAGCAACCATAAGTCCCGCCCTAAC  
TCCGCCCATCCCGCCCTAACTCCGCCAGTTCGCCCATCTCCGCCCATGGCTGACTAATTTTTTTTAT  
TTATGCAGAGGCCGAGGCCGCTCGGCCTCTGAGCTATTCCAGAAGTAGTGAGGAGGCTTTTTTGGAGGC  
CTAGGCTTTTTGCAAAAAGCTTACCATGACCGAGTACAAGCCACGGTGCCTCGCCACCCGCGACGACG  
TCCCCAGGGCCGTACGCACCCCTCGCCGCCGCGTTCCGCCACTACCCCGCCACGCGCCACACCGTTCGATCC  
GGACCGCCACATCGAGCGGGTCAACGAGCTGCAAGAACTCTTCTCACGCGGTCGGGCTCGACATCGGC  
AAGGTGTGGGTCGCGGACGACGGCGCCGCGGTGGCGGTCTGGACCAACGCGGAGAGCGTGAAGCGGGG  
GCGGTGTTCCCGAGATCGGCCCGCATGGCCGAGTTGAGCGGTTCCCGGCTGGCCGCGCAGCAACAGA  
TGAAAGGCCTCCTGGCGCCGACCCGGCCAAAGGAGCCCGCGTGGTTCTGGCCACCGTCGGCGTCTCGCC  
CGACCACCAGGGCAAGGGTCTGGGCAGCGCCGTCGTCTCCCGGAGTGGAGGCGGCGCCGAGCGCGCCG  
GGTCCCGCCTTCTGGAGACTCCCGCCCGAACCTCCCCTTCTACGAGCGGCTCGGCTTACCGTCA  
CCGCCAGCTCGAGTGCCCGAAGGACCGCGACCTGGTGTGATACCCCGAAGCCCGGTGCCTACGCGCC  
GCCCCACGACCCGAGCGCCCGACCGAAAGGAGCGCACGACCCCATGCCAGTCGACAATCAACCTCTGG  
ATTACAAAATTTGTGAAAGATTGACTGGTATTCTTAACTATGTTGCTCCTTTTACGCTATGTGGATACGCT  
GCTTTAATGCCTTTGTATCATGCTATTGCTTCCCGTATGGCTTTCATTTTCTCCTCCTTGTATAAATCCTGGT  
TGCTGTCTCTTATGAGGAGTTGTGGCCCGTTGTCAGGCAACGTGGCGTGGTGTGCACTGTGTTTGTGAC  
GCAACCCCACTGGTTGGGGCATTGCCACCACCTGTCAGCTCCTTCCGGGACTTTCGCTTTCCCCCTCCCT  
ATTGCCACGGCGGAACTCATCGCCGCTGCCTTGCCCGCTGCTGGACAGGGGCTCGGCTGTTGGGCACTG  
ACAATTCCGTGGTGTGTGCGGGGAAGCTGACGTCCTTTCATGGCTGCTCGCCTGTGTTGCCACCTGGATT  
CTGCGCGGGACGTCCTTCTGCTACGTCCTTTCGGCCCTCAATCCAGCGGACCTTCTTCCCGCGGCCTGCT  
GCCGGCTCTGCGGCCTTTCGCGTCTTCGCCTTCGCCCTCAGACGAGTCGGATCTCCCTTTGGGCCGCT  
CCCCGCTGGAATTCGAGCTCGGTACCTTTAAGACCAATGACTTACAAGGCAGCTGTAGATCTTAGCCAC  
TTTTTAAAAGAAAAGGGGGGACTGGAAGGGCTAATCACTCCAACGAAGACAAGATCTGCTTTTTGCTT  
GTACTGGGTCTCTCTGGTTAGACCAGATCTGAGCCTGGGAGCTCTCTGGCTAACTAGGGAACCCACTGCTT  
AAGCCTCAATAAAGCTTGCTTGAGTGCTCAAGTAGTGTGTGCCCGTCTGTTGTGTGACTCTGGTAACTA  
GAGATCCCTCAGACCCTTTTAGTCAGTGTGGAATACTCTAGCAGTAGTAGTTCATGTCATCTTATTATTC  
AGTATTTATAAATTGCAAAGAAATGAATATCAGAGAGTGAGAGGAACTTGTTTATTGCAGCTTATAATGG  
TTACAAATAAAGCAATAGCATCAAAATTTACAAATAAAGCATTTTTTTCACTGCATTCTAGTTGTGGTT  
TGTTCAAACCTCATCAATGTATCTTATCATGTCTGGCTCTAGCTATCCCGCCCTAACTCCGCCAGTTCGGC  
CCATTCTCCGCCCATGGCTGACTAATTTTTTTTATTTATGCAAGGGCCGAGGCCGCTCGGCCTCTGAGC  
TATTCCAGAAGTAGTGAGGAGGCTTTTTTGGAGGCCTAGGCTTTTGCCTCGAGACGTACCCAATTCGCCCT  
ATAGTGAGTCGATTACGCGCGCTCACTGGCCGTCGTTTTACAACGTCGTGACTGGGAAAACCTGGCGTT  
ACCAACTTAATCGCCTTGCAGCACATCCCCCTTTCGCCAGCTGGCGTAATAGCGAAGAGGCCCGCACCG  
ATCGCCCTTCCCAACAGTTGCGCAGCCTGAATGGCGAATGGCGCAGCGCCCTGTAGCGGCGCATTAAG  
CGCGGCGGTGTGGTGTGTTACGCGCAGCGTGAACCTGACACTTGCACGCGCCCTAGCGCCGCTCCTTTC  
GCTTCTTCCCTTCTTCTCGCCACGTTCCGCCGCTTTCGCCGTCAGGCTCTAAATCGGGGGCTCCCTTTC  
GGGTTCCGATTTAGTGCTTTACGGCACCTCGACCCCAAAAAAATTGATTAGGGTGATGGTTCACGTAGTG  
GGCCATCGCCCTGATAGACGGTTTTTTCGCCCTTTCAGCTTGGAGTCCACGTTCTTTAATAGTGGACTCTTG



TTCCAAACTGGAACAACACTCAACCCTATCTCGGTCTATTCTTTTGATTATAAAGGATTTTGCCGATTTTCG  
GCCTATTGGTTAAAAAATGAGCTGATTTAACAAAAATTTAACGCGAATTTTAACAAAATATTAACGTTTA  
CAATTTCCAGGTGGCACTTTTCGGGGAAATGTGCGCGGAACCCCTATTTGTTATTTTTCTAAATACATT  
CAAATATGTATCCGCTCATGAGACAATAACCCTGATAAATGCTTCAATAATATTGAAAAAGGAAGAGTAT  
GAGTATTCAACATTTCCGTGTGCCCCTTATCCCTTTTTGCGGCATTTTGCCCTTCTGTTTTGCTCACCCA  
GAAACGCTGGTGAAGTAAAAGATGCTGAAGATCAGTTGGGTGCACGAGTGGGTACATCGAACTGGAT  
CTCAACAGCGGTAAGATCCTTGAGAGTTTTCGCCCCGAAGAACGTTTTCCAATGATGAGCACTTTTAAAGT  
TCTGCTATGTGGCGCGGTATTATCCCGTATTGACGCCGGGCAAGAGCAACTCGGTGCGCCGATACACTATT  
CTCAGAATGACTTGGTTGAGTACTACCAGTACAGAAAAGCATCTTACGGATGGCATGACAGTAAGAGA  
ATTATGCAGTGTGCCATAACCATGAGTGATAACACTGCGGCCAACTTACTTCTGACAACGATCGGAGGA  
CCGAAGGAGCTAACCGCTTTTTGCACAACATGGGGGATCATGTAACCTCGCCTTGATCGTTGGGAACCGG  
AGCTGAATGAAGCCATACCAAACGACGAGCGTGACACCAGATGCCTGTAGCAATGGCAACAACCGTTGC  
GCAAACATTAAGCTGGCGAACTACTTACTTAGCTTCCCGGCAACAATTAATAGACTGGATGGAGGCGGA  
TAAAGTTGCAGGACCACTTCTGCGCTCGGCCCTTCCGGCTGGCTGGTTTTATTGCTGATAAATCTGGAGCCG  
GTGAGCGTGGGTCTCGCGGTATCATTGCAGCACTGGGGCCAGATGGTAAGCCCTCCCGTATCGTAGTTAT  
CTACACGACGGGAGTCAGGCAACTATGGATGAACGAAATAGACAGATCGCTGAGATAGGTGCCTCACT  
GATTAAGCATTGGTAACTGTCAGACCAAGTTTACTCATATATACTTTAGATTGATTTAAACTTCATTTTT  
AATTTAAAAGGATCTAGGTGAAGATCCTTTTTGATAATCTCATGACCAAAATCCCTTAACGTGAGTTTTCG  
TTCCACTGAGCGTCAGACCCCGTAGAAAAGATCAAAGGATCTTCTTGAGATCCTTTTTTTCTGCGCGTAAT  
CTGCTGCTTGCAAACAAAAAAACCACCGCTACCAGCGGTGGTTTTGTTGCCGATCAAGAGCTACCAACT  
CTTTTTCCGAAGGTAAGTGGCTTACGACAGAGCGCAGATACCAAATACTGTCCTTCTAGTGTAGCCGTAGTT  
AGGCCACCACTTCAAGAACTCTGTAGCACCGCCTACATACCTCGCTCTGCTAATCCTGTTACCAGTGGCTG  
CTGCCAGTGGCGATAAGTCGTGTCTTACCGGGTTGACTCAAGACGATAGTTACCGGATAAGGCGCAGCG  
GTCGGGCTGAACGGGGGGTTCGTGCACACAGCCCAGCTTGGAGCGAACGACCTACACCGAACTGAGATA  
CCTACAGCGTGAGCTATGAGAAAGCGCCACGCTTCCCGAAGGGAGAAAGGCGGACAGGTATCCGGTAAG  
CGGCAGGGTCGGAACAGGAGAGCGCACGAGGGAGCTTCCAGGGGAAACGCCTGGTATCTTTATAGTCC  
TGTCGGGTTTTCGCCACCTCTGACTTGAGCGTCGATTTTTGTGATGCTCGTCAGGGGGGGCGGAGCCTATGGA  
AAAACGCCAGCAACGCGGCCTTTTTACGGTTCTGGCCTTTTGCTGGCCTTTTGCTCACATGTTCTTTCCTG  
CGTTATCCCTGATTCTGTGGATAACCGTATTACCGCCTTTGAGTGAGCTGATACCGCTCGCCGACGCCGA  
ACGACCGAGCGCAGCGAGTCAAGTGAAGCGGAAAGCGGAAGAGCGCCCAATACGCAAAACCGCCTCTCCC  
GCGCGTTGGCCGATTCATTAATGCAGCTGGCACGACAGGTTTCCCGACTGGAAGCGGGCAGTGAGCGCA  
ACGCAATTAATGTGAGTTAGCTCACTCATTAGGCACCCAGGCTTTACACTTTATGCTTCCGGCTCGTATG  
TTGTGTGGAATTGTGAGCGGATAACAATTTACACAGGAAACAGCTATGACCATGATTACGCCAAGCGCG  
CAATTAACCTCACTAAAGGGAACAAAAGCTGGAGTCAAGCTTAATGTAGTCTTATGCAATACTCTTG  
TAGTCTTGCAACATGGTAACGATGAGTTAGCAACATGCCTTACAAGGAGAGAAAAAGCACCCTGATGCC  
GATTGGTGAAGTAAGTGGTACGATCGTGCCTTATTAGGAAGGCAACAGACGGGTCTGACATGGATTGG  
ACGAACCACTGAATTGCCGCAATTGCAGAGATATTGATTTAAGTGCCTAGCTCGATACAATAACGGGTC  
TCTCTGTTAGACCAGATCTGAGCCTGGGAGCTCTCTGGCTAACTAGGGAACCCACTGCTTAAAGCCTCAAT  
AAAGCTTGCCTTGAGTGCTTCAAGTAGTGTGTGCCCGTCTGTTGTGTGACTCTGGTAACTAGAGATCCCTC  
AGACCTTTTTAGTCAAGTGTGAAAATCTCTAGCAGTGGCGCCCGAACAGGGACCTGAAAGCGAAAAGGGA  
AACCAGAGCTCTCTCGACGCAGGACTCGGCTTGTGAAGCGCGCACGGCAAGAGGGCAGGGGCGGCGAC  
TGGTGAGTACGCCAAAAATTTGACTAGCGGAGGCTAGAAGGAGAGAGATGGGTGCGAGAGCGTCAGTA  
TTAAGCGGGGGAGAATTAGATCGCGATGGGAAAAAATTCGGTTAAGGCCAGGGGGAAAGAAAAAATATA  
AATTAACATATAGTATGGGCAAGCAGGGAGCTAGAACGATTTCGAGTTAATCCTGGCCTGTTAGAAC  
ATCAGAAGGCTGTAGACAAATACTGGGACAGCTACAACCATCCCTTCAGACAGGATCAGAAGAATAG  
ATCATTATATAATACAGTAGCAACCCTCTATTGTGTGCATCAAAGGATAGAGATAAAAGACACCAAGGAA  
GCTTTAGACAAGATAGAGGAAGAGCAAAAACAAAAGTAAGACCACCGCACAGCAAGCGGCCGCTGATCTT  
CAGACCTGGAGGAGGAGATATGAGGGACAATTGGAGAAGTGAATTATATAAATATAAAGTAGTAAAAT  
TGAACCATTAGGAGTAGCACCCACCAAGGCAAAGAGAAGAGTGGTGCAGAGAGAAAAAAGAGCAGTGG  
GAATAGGAGCTTTGTTCCCTTGGGTTCTTGGGAGCAGCAGGAAGCACTATGGGCGCAGCCTCAATGACGCT  
GACGGTACAGGCCAGACAATTATTGCTGGTATAGTGCAGCAGCAGAACAAATTTGCTGAGGGCTATTGAG  
GCGCAACAGCATCTGTTGCAACTCACAGTCTGGGGCATCAAGCAGCTCCAGGCAAGAATCCTGGCTGTGG  
AAAGATACCTAAAGGATCAACAGCTCCTGGGGATTTGGGGTTGCTCTGGAAACTCATTTGCACCACTGC  
TGTGCCTTGGAAATGCTAGTTGGAGTAATAAATCTCTGGAACAGATTTGGAATCACACGACCTGGATGGAG  
TGGGACAGAGAAATTAACAATTACACAAGCTTAATACACTCCTTAATTGAAGAATCGCAAAAACAGCAA  
GAAAAGAATGAACAAGAATTATTGGAATTAGATAAATGGGCAAGTTTGTGGAATTGGTTTAAACATAACA  
AATTGGCTGTGGTATATAAAATATTTCATAATGATAGTAGGAGGCTTGGTAGGTTTAAAGAATAGTTTTGC  
TGACTTTCTATAGTGAATAGAGTTAGGCAGGATATACCATTATCGTTTTAGACCCACCTCCCAACCC  
CGAGGGACCCGACAGGCCCGAAGGAATAGAAGAAGAAGGTGGAGAGAGACAGACAGACAGATCCATT  
CGATTAGTGAACGGATCTCGACGGTATCGGTTAACTTTTTAAAGAAAAGGGGGATTGGGGGTACAGT  
GCAGGGGAAAGAATAGTAGACATAATAGCAACAGACATACAACTAAAGAATTACAAAAACAAATTACA  
AAAATTCAAAATTTTATCGATCACGAGACTAGCCTC

### Generation of *Ctnnb1* KO cells

CRISPR/Cas9 was used to induce small in-dels, microdeletions or complete deletion of the *Ctnnb1* locus using single sgRNA or pairwise combinations. Briefly for each experiment  $5 \times 10^6$  mESCs (E14Tg2a from ATCC) per well were seeded onto gelatin-coated mw6 plates. 24 hours after seeding, 2 ml of fresh mESCs medium were provided at least 30 minutes before transfection. Transfection mix consisted of 5  $\mu$ g of all-in-one vectors expressing Cas9 and previously subcloned sgRNA (px459-spCas9-Puro), 100  $\mu$ l Optimem (Thermo-Fisher) and 20  $\mu$ l Polyfectamine reagent (Qiagen). For co-transfection of two sgRNAs, 2.5  $\mu$ g of each vector were used. Transfection mix was incubated 15 minutes at room temperature and then directly added to seeded mESCs. Fresh mESC medium was added to a final volume of 2,7 ml and 24 hours after, medium was replaced. 48 hours after transfection puromycin selection (5  $\mu$ g/ml) was applied for additional 48 hours. Cells were then analysed at population level to assess the knock-out efficiency. For the establishment of  $\beta$ -catenin KO cell lines, transfected pools were replated at clonal density and single cell clones were manually picked and screened for homozygous *Ctnnb1* deletion. For PCR assay of *Ctnnb1*, two or three oligonucleotides were used depending on the deletion strategy. Knock-out and screening strategies together with oligos for genotyping edited cells are summarised in **Table S6**.

### Cell cycle and proliferation analysis

For cell cycle analysis, cells were seeded in equal number ( $1 \times 10^6$  cells) on gelatin coated 10 cm dishes. 3 days after plating cells were trypsinised and collected with complete medium by centrifugation at 300xg for 5 minutes. Cell pellet was washed with PBS twice and centrifuged again for 5 minutes at 300xg. The pellet was then resuspended in cold 70% Ethanol while vortexing and incubated overnight at 4C. The next day cells were stained with propidium iodide after RNaseI treatment using the Propidium Iodide Flow Cytometry Kit (Abcam ab139418) following manufacturer's instructions. DNA content was measured on a BD Fortessa cytometer. Finally, FCS files were processed in FlowJo using the built-in cell-cycle analysis plug-in.

For growth curve analysis  $7 \times 10^3$  mESCs per well were plated in triplicates in 96-well plates. For cell counts by FACS each day, for the following 96 hours, cells were detached, diluted in DAPI containing medium to stain dead cells and transferred into mw96 U-bottom plates (Falcon) and counted using FACS-canto. Exponential growth curves and population doubling time were calculated as previously described (De Jaime-Soguero et al., 2017).

### Lentivirus production

For mESCs transduction, lentiviral particles were produced following the RNA interference Consortium (TRC) instructions for lentiviral particle production and infection in 6-well plates (<http://www.broadinstitute.org/rnai/public/>). Briefly,  $5 \times 10^5$  HEK293T cells/well were seeded in 6-well plates. The day after plating, the cells were co-transfected with 1  $\mu$ g of lentiviral vector, 750  $\mu$ g pCMV-dR8.9, and 250  $\mu$ g pCMV-VSV-G, using Polyfect reagent (Qiagen). The day after transfection, the HEK293T culture medium was substituted with the ESC culture medium. Then  $5 \times 10^5$  ESCs/well were plated onto gelatin-coated 6-well plates the day before transduction. The lentiviral particles containing medium was harvested from HEK293T cells at 48, 72 and 96 hrs after transfection, filtered, and added to the ESC plates. The day after transduction, these ESCs were washed twice in PBS and hygromycin selection or puromycin selection were applied.

### Supplemental references

Aulicino, F., Theka, I., Ombrato, L., Lluís, F., and Cosma, M.P. (2014). Temporal perturbation of the Wnt signaling pathway in the control of cell reprogramming is modulated by TCF1. *Stem Cell Reports* 2, 707-720.

De Jaime-Soguero, A., Aulicino, F., Ertaylan, G., Griego, A., Cerrato, A., Tallam, A., Del Sol, A., Cosma, M.P., and Lluís, F. (2017). Wnt/Tcf1 pathway restricts embryonic stem cell cycle through activation of the *Ink4/Arf* locus. *PLoS Genet* 13, e1006682.

Fuerer, C., and Nusse, R. (2010). Lentiviral Vectors to Probe and Manipulate the Wnt Signaling Pathway. *PLOS ONE* 5, e9370.

Lyashenko, N., Winter, M., Migliorini, D., Biechele, T., Moon, R.T., and Hartmann, C. (2011). Differential requirement for the dual functions of beta-catenin in embryonic stem cell self-renewal and germ layer formation. *Nature cell biology* 13, 753-761.

Ran, F.A., Hsu, P.D., Wright, J., Agarwala, V., Scott, D.A., and Zhang, F. (2013). Genome engineering using the CRISPR-Cas9 system. *Nature protocols* *8*, 2281-2308.

Wray, J., Kalkan, T., Gomez-Lopez, S., Eckardt, D., Cook, A., Kemler, R., and Smith, A. (2011). Inhibition of glycogen synthase kinase-3 alleviates Tcf3 repression of the pluripotency network and increases embryonic stem cell resistance to differentiation. *Nature cell biology* *13*, 838-845.
